# Supplementary material for: APRF1 Interactome Reveals HSP90 as a New Player in the Complex That Epigenetically Regulates Flowering Time in Arabidopsis thaliana
Source: MDPI journal article supplement (doi:10.3390/ijms25021313), 2024-01-21
Supplement: s1 [file s1]

**Supplementary Table S2:** List of primers used in this study.

| <b>Primer name</b> | <b>Sequence</b>                                                    |
|--------------------|--------------------------------------------------------------------|
| WUS-F              | TGCAAGCTCAGGTACTGAATG                                              |
| WUS-R              | ACGTCGATGTTCCAGATAAGC                                              |
| STM-F              | CATAACGAAATCGTTGCAGGA                                              |
| STM-R              | ATCGACTTCTTCCTCGGATGA                                              |
| CLV1-F             | GCTTGCTAAGTTCTTAGTTGATGG                                           |
| CLV1-R             | GCATCCGATGGCTGAGTTAT                                               |
| GAPDH-F            | TGTCAACGAGCACGAATACAAG                                             |
| GAPDH-R            | TCACAAACTTGTCGCTCAATGC                                             |
| APRF1-Xba-SpyNE    | ATATCTAGATGTCGTTGACGGAGCTAGAC                                      |
| APRF1-Xho-SpyNE    | ATACTCGAGCTGTTGTTGATCGGTAGGAGGA                                    |
| APRF1-FLAG-F       | TAATCTAGATGGTGGAATTTACAGAGAGAG<br>TATGAGCTCTAATCCTTGTAGTCCTTGTCATC |
| APRF1-FLAG-R       | GTCATCCTTGTAGTCTTTCCGAATGGCATAA<br>GCTGGC                          |
