# Supplementary material for: APRF1 Interactome Reveals HSP90 as a New Player in the Complex That Epigenetically Regulates Flowering Time in Arabidopsis thaliana
Source: Int J Mol Sci. 2024 Jan 21;25(2):1313. doi: 10.3390/ijms25021313 (PMC10816710; doi:10.3390/ijms25021313)
Supplement: Supplementary file 1 [file ijms-25-01313-s001.zip › Table S1.xlsx]

## Sheet: Sheet1
Table S1: Full list of the entire functional enrichment analysis (Flame)
Enrichment Results
		Source	Term_ID	Function	P-value	-log10Pvalue	Term Size	Query size	Intersection Size	Enrichment Score %	Positive Hits	Term_ID_noLinks
25	⊕	GO:CC	GO:0005737	cytoplasm	9.67e-89	88.01	10520	453	422	4.01	AT1G01200.1, AT1G02560.1, AT1G03475.1, AT1G04170.1, AT1G04480.1, AT1G05180.1, AT1G06400.1, AT1G06430.1, AT1G06680.1, AT1G07370.1, AT1G07890.1, AT1G08450.1, AT1G08520.1, AT1G08730.1, AT1G09100.1, AT1G09130.1, AT1G09310.1, AT1G09340.1, AT1G09795.1, AT1G10200.1, AT1G10290.1, AT1G10730.1, AT1G11650.1, AT1G11720.1, AT1G11840.1, AT1G11910.1, AT1G12230.1, AT1G15470.1, AT1G15710.1, AT1G16350.1, AT1G16460…	GO:0005737
118	⊕	GO:CC	GO:0005829	cytosol	3.27e-68	67.49	2754	453	212	7.7	AT1G04480.1, AT1G06400.1, AT1G07370.1, AT1G07890.1, AT1G09100.1, AT1G09310.1, AT1G09340.1, AT1G10290.1, AT1G11650.1, AT1G11840.1, AT1G16350.1, AT1G16460.1, AT1G17720.1, AT1G20200.1, AT1G20630.1, AT1G22780.1, AT1G23410.1, AT1G25490.1, AT1G26570.1, AT1G26910.2, AT1G27310.1, AT1G27400.1, AT1G30230.1, AT1G35420.1, AT1G35720.1, AT1G36160.1, AT1G36180.1, AT1G45000.1, AT1G47250.1, AT1G48630.1, AT1G48830…	GO:0005829
42	⊕	GO:CC	GO:0009536	plastid	1.47e-59	58.83	2878	453	205	7.12	AT1G02560.1, AT1G03475.1, AT1G06430.1, AT1G06680.1, AT1G07890.1, AT1G08520.1, AT1G09130.1, AT1G09340.1, AT1G09795.1, AT1G11720.1, AT1G11840.1, AT1G12230.1, AT1G15710.1, AT1G16720.1, AT1G18500.1, AT1G20630.1, AT1G21440.1, AT1G22410.1, AT1G22940.1, AT1G23740.1, AT1G24280.1, AT1G26910.2, AT1G29900.1, AT1G32200.1, AT1G32220.1, AT1G32440.1, AT1G32500.1, AT1G35420.1, AT1G35720.1, AT1G36280.1, AT1G48350…	GO:0009536
72	⊕	GO:CC	GO:0009570	chloroplast stroma	1.92e-58	57.72	770	453	111	14.42	AT1G02560.1, AT1G03475.1, AT1G06680.1, AT1G07890.1, AT1G08520.1, AT1G09130.1, AT1G09340.1, AT1G09795.1, AT1G12230.1, AT1G16720.1, AT1G18500.1, AT1G21440.1, AT1G22940.1, AT1G23740.1, AT1G24280.1, AT1G29900.1, AT1G32200.1, AT1G32220.1, AT1G32440.1, AT1G32500.1, AT1G35420.1, AT1G35720.1, AT1G36280.1, AT1G48350.1, AT1G49970.1, AT1G51660.1, AT1G55480.1, AT1G64190.1, AT1G65260.1, AT1G66670.1, AT1G70580…	GO:0009570
75	⊕	GO:CC	GO:0009532	plastid stroma	4.03e-58	57.39	777	453	111	14.29	AT1G02560.1, AT1G03475.1, AT1G06680.1, AT1G07890.1, AT1G08520.1, AT1G09130.1, AT1G09340.1, AT1G09795.1, AT1G12230.1, AT1G16720.1, AT1G18500.1, AT1G21440.1, AT1G22940.1, AT1G23740.1, AT1G24280.1, AT1G29900.1, AT1G32200.1, AT1G32220.1, AT1G32440.1, AT1G32500.1, AT1G35420.1, AT1G35720.1, AT1G36280.1, AT1G48350.1, AT1G49970.1, AT1G51660.1, AT1G55480.1, AT1G64190.1, AT1G65260.1, AT1G66670.1, AT1G70580…	GO:0009532
45	⊕	GO:CC	GO:0009507	chloroplast	5.99e-55	54.22	2370	453	180	7.59	AT1G02560.1, AT1G03475.1, AT1G06430.1, AT1G06680.1, AT1G07890.1, AT1G08520.1, AT1G09130.1, AT1G09340.1, AT1G09795.1, AT1G11720.1, AT1G11840.1, AT1G12230.1, AT1G15710.1, AT1G16720.1, AT1G18500.1, AT1G20630.1, AT1G21440.1, AT1G22410.1, AT1G22940.1, AT1G23740.1, AT1G24280.1, AT1G26910.2, AT1G29900.1, AT1G32200.1, AT1G32220.1, AT1G32440.1, AT1G32500.1, AT1G35420.1, AT1G35720.1, AT1G36280.1, AT1G48350…	GO:0009507
23	⊕	GO:CC	GO:0005622	intracellular anatomical structure	8.78e-48	47.06	14688	453	437	2.98	AT1G01200.1, AT1G02560.1, AT1G03475.1, AT1G04170.1, AT1G04480.1, AT1G05180.1, AT1G06400.1, AT1G06430.1, AT1G06680.1, AT1G07370.1, AT1G07890.1, AT1G08450.1, AT1G08520.1, AT1G08730.1, AT1G09100.1, AT1G09130.1, AT1G09310.1, AT1G09340.1, AT1G09795.1, AT1G10200.1, AT1G10290.1, AT1G10730.1, AT1G11650.1, AT1G11720.1, AT1G11840.1, AT1G11910.1, AT1G12230.1, AT1G15470.1, AT1G15710.1, AT1G16350.1, AT1G16460…	GO:0005622
180	⊕	GO:BP	GO:0044281	small molecule metabolic process	1.33e-44	43.88	1802	426	136	7.55	AT1G07250.1, AT1G09340.1, AT1G09795.1, AT1G11840.1, AT1G12230.1, AT1G15710.1, AT1G16350.1, AT1G18500.1, AT1G22410.1, AT1G22940.1, AT1G24280.1, AT1G26570.1, AT1G29900.1, AT1G32220.1, AT1G32440.1, AT1G36160.1, AT1G36180.1, AT1G36280.1, AT1G44542.1, AT1G48470.1, AT1G52400.1, AT1G55810.1, AT1G59900.1, AT1G60550.1, AT1G62940.1, AT1G63660.1, AT1G64190.1, AT1G70580.1, AT1G70820.1, AT1G72330.1, AT1G72810…	GO:0044281
182	⊕	GO:BP	GO:0019752	carboxylic acid metabolic process	6.03e-35	34.22	1102	426	96	8.71	AT1G07250.1, AT1G09795.1, AT1G11840.1, AT1G15710.1, AT1G18500.1, AT1G22410.1, AT1G26570.1, AT1G29900.1, AT1G32440.1, AT1G36160.1, AT1G36180.1, AT1G44542.1, AT1G48470.1, AT1G52400.1, AT1G59900.1, AT1G62940.1, AT1G63660.1, AT1G64190.1, AT1G70580.1, AT1G72330.1, AT1G72810.1, AT1G72970.1, AT1G74040.2, AT1G74260.1, AT1G74910.3, AT1G76550.1, AT1G77670.1, AT2G04842.1, AT2G13560.1, AT2G20860.1, AT2G21170…	GO:0019752
179	⊕	GO:BP	GO:0043436	oxoacid metabolic process	1.4e-32	31.86	1211	426	97	8.01	AT1G07250.1, AT1G09795.1, AT1G11840.1, AT1G15710.1, AT1G18500.1, AT1G22410.1, AT1G26570.1, AT1G29900.1, AT1G32440.1, AT1G36160.1, AT1G36180.1, AT1G44542.1, AT1G48470.1, AT1G52400.1, AT1G59900.1, AT1G62940.1, AT1G63660.1, AT1G64190.1, AT1G70580.1, AT1G72330.1, AT1G72810.1, AT1G72970.1, AT1G74040.2, AT1G74260.1, AT1G74910.3, AT1G76550.1, AT1G77670.1, AT2G04842.1, AT2G13560.1, AT2G20860.1, AT2G21170…	GO:0043436
181	⊕	GO:BP	GO:0006082	organic acid metabolic process	1.4e-32	31.86	1212	426	97	8	AT1G07250.1, AT1G09795.1, AT1G11840.1, AT1G15710.1, AT1G18500.1, AT1G22410.1, AT1G26570.1, AT1G29900.1, AT1G32440.1, AT1G36160.1, AT1G36180.1, AT1G44542.1, AT1G48470.1, AT1G52400.1, AT1G59900.1, AT1G62940.1, AT1G63660.1, AT1G64190.1, AT1G70580.1, AT1G72330.1, AT1G72810.1, AT1G72970.1, AT1G74040.2, AT1G74260.1, AT1G74910.3, AT1G76550.1, AT1G77670.1, AT2G04842.1, AT2G13560.1, AT2G20860.1, AT2G21170…	GO:0006082
36	⊕	GO:MF	GO:0036094	small molecule binding	7.81e-31	30.11	3378	441	166	4.91	AT1G01200.1, AT1G04170.1, AT1G05180.1, AT1G06400.1, AT1G06430.1, AT1G06680.1, AT1G08520.1, AT1G08730.1, AT1G09100.1, AT1G10290.1, AT1G15710.1, AT1G16350.1, AT1G18270.1, AT1G22940.1, AT1G24280.1, AT1G25490.1, AT1G26570.1, AT1G29900.1, AT1G32440.1, AT1G35720.1, AT1G36160.1, AT1G36180.1, AT1G45000.1, AT1G48470.1, AT1G51660.1, AT1G53780.1, AT1G55810.1, AT1G62940.1, AT1G63660.1, AT1G64190.1, AT1G70580…	GO:0036094
21	⊕	GO:MF	GO:0003824	catalytic activity	5.69e-29	28.25	9406	441	299	3.18	AT1G01200.1, AT1G02560.1, AT1G03475.1, AT1G04170.1, AT1G05180.1, AT1G06400.1, AT1G06410.1, AT1G06430.1, AT1G06640.1, AT1G07250.1, AT1G07890.1, AT1G08520.1, AT1G09100.1, AT1G09130.1, AT1G09795.1, AT1G10290.1, AT1G11720.1, AT1G11840.1, AT1G11910.1, AT1G12230.1, AT1G15710.1, AT1G16350.1, AT1G16460.1, AT1G18270.1, AT1G18500.1, AT1G20630.1, AT1G21440.1, AT1G22360.1, AT1G22410.1, AT1G22940.1, AT1G23740…	GO:0003824
92	⊕	GO:BP	GO:1901566	organonitrogen compound biosynthetic process	9.18e-27	26.04	2424	426	129	5.32	AT1G03475.1, AT1G04170.1, AT1G04480.1, AT1G08520.1, AT1G09340.1, AT1G09795.1, AT1G15710.1, AT1G16350.1, AT1G16720.1, AT1G18500.1, AT1G22410.1, AT1G22780.1, AT1G22940.1, AT1G23410.1, AT1G26570.1, AT1G26910.2, AT1G27400.1, AT1G29900.1, AT1G30230.1, AT1G36160.1, AT1G36180.1, AT1G36280.1, AT1G48350.1, AT1G48410.1, AT1G48470.1, AT1G48630.1, AT1G48830.1, AT1G55810.1, AT1G59900.1, AT1G62940.1, AT1G63660…	GO:1901566
33	⊕	GO:CC	GO:0043229	intracellular organelle	1.49e-26	25.83	13209	453	388	2.94	AT1G01200.1, AT1G02560.1, AT1G03475.1, AT1G04480.1, AT1G05180.1, AT1G06400.1, AT1G06430.1, AT1G06680.1, AT1G07370.1, AT1G07890.1, AT1G08450.1, AT1G08520.1, AT1G08730.1, AT1G09100.1, AT1G09130.1, AT1G09310.1, AT1G09340.1, AT1G09795.1, AT1G10200.1, AT1G10290.1, AT1G10730.1, AT1G11650.1, AT1G11720.1, AT1G11840.1, AT1G11910.1, AT1G12230.1, AT1G15710.1, AT1G16350.1, AT1G16460.1, AT1G16720.1, AT1G17720…	GO:0043229
24	⊕	GO:CC	GO:0043226	organelle	6.22e-26	25.21	13281	453	388	2.92	AT1G01200.1, AT1G02560.1, AT1G03475.1, AT1G04480.1, AT1G05180.1, AT1G06400.1, AT1G06430.1, AT1G06680.1, AT1G07370.1, AT1G07890.1, AT1G08450.1, AT1G08520.1, AT1G08730.1, AT1G09100.1, AT1G09130.1, AT1G09310.1, AT1G09340.1, AT1G09795.1, AT1G10200.1, AT1G10290.1, AT1G10730.1, AT1G11650.1, AT1G11720.1, AT1G11840.1, AT1G11910.1, AT1G12230.1, AT1G15710.1, AT1G16350.1, AT1G16460.1, AT1G16720.1, AT1G17720…	GO:0043226
32	⊕	GO:CC	GO:0043231	intracellular membrane-bounded organelle	2.37e-25	24.62	12705	453	377	2.97	AT1G01200.1, AT1G02560.1, AT1G03475.1, AT1G04480.1, AT1G05180.1, AT1G06400.1, AT1G06430.1, AT1G06680.1, AT1G07370.1, AT1G07890.1, AT1G08450.1, AT1G08520.1, AT1G09100.1, AT1G09130.1, AT1G09310.1, AT1G09340.1, AT1G09795.1, AT1G10290.1, AT1G10730.1, AT1G11650.1, AT1G11720.1, AT1G11840.1, AT1G11910.1, AT1G12230.1, AT1G15710.1, AT1G16350.1, AT1G16460.1, AT1G16720.1, AT1G17720.1, AT1G18270.1, AT1G18450…	GO:0043231
1	⊕	GO:MF	GO:1901265	nucleoside phosphate binding	3.88e-25	24.41	3146	441	148	4.7	AT1G01200.1, AT1G04170.1, AT1G05180.1, AT1G06400.1, AT1G06430.1, AT1G08520.1, AT1G08730.1, AT1G09100.1, AT1G10290.1, AT1G15710.1, AT1G16350.1, AT1G18270.1, AT1G22940.1, AT1G24280.1, AT1G26570.1, AT1G29900.1, AT1G32440.1, AT1G35720.1, AT1G36160.1, AT1G36180.1, AT1G45000.1, AT1G48470.1, AT1G51660.1, AT1G53780.1, AT1G55810.1, AT1G62940.1, AT1G63660.1, AT1G64190.1, AT1G72730.1, AT1G72970.1, AT1G73110…	GO:1901265
10	⊕	GO:CC	GO:0043227	membrane-bounded organelle	3.86e-25	24.41	12790	453	378	2.96	AT1G01200.1, AT1G02560.1, AT1G03475.1, AT1G04480.1, AT1G05180.1, AT1G06400.1, AT1G06430.1, AT1G06680.1, AT1G07370.1, AT1G07890.1, AT1G08450.1, AT1G08520.1, AT1G08730.1, AT1G09100.1, AT1G09130.1, AT1G09310.1, AT1G09340.1, AT1G09795.1, AT1G10290.1, AT1G10730.1, AT1G11650.1, AT1G11720.1, AT1G11840.1, AT1G11910.1, AT1G12230.1, AT1G15710.1, AT1G16350.1, AT1G16460.1, AT1G16720.1, AT1G17720.1, AT1G18270…	GO:0043227
17	⊕	GO:MF	GO:0000166	nucleotide binding	3.88e-25	24.41	3146	441	148	4.7	AT1G01200.1, AT1G04170.1, AT1G05180.1, AT1G06400.1, AT1G06430.1, AT1G08520.1, AT1G08730.1, AT1G09100.1, AT1G10290.1, AT1G15710.1, AT1G16350.1, AT1G18270.1, AT1G22940.1, AT1G24280.1, AT1G26570.1, AT1G29900.1, AT1G32440.1, AT1G35720.1, AT1G36160.1, AT1G36180.1, AT1G45000.1, AT1G48470.1, AT1G51660.1, AT1G53780.1, AT1G55810.1, AT1G62940.1, AT1G63660.1, AT1G64190.1, AT1G72730.1, AT1G72970.1, AT1G73110…	GO:0000166
60	⊕	GO:BP	GO:1901564	organonitrogen compound metabolic process	3.23e-24	23.49	6250	426	220	3.52	AT1G02560.1, AT1G03475.1, AT1G04170.1, AT1G04480.1, AT1G05180.1, AT1G06430.1, AT1G08450.1, AT1G08520.1, AT1G09100.1, AT1G09130.1, AT1G09340.1, AT1G09795.1, AT1G11910.1, AT1G12230.1, AT1G15710.1, AT1G16350.1, AT1G16720.1, AT1G17720.1, AT1G18450.1, AT1G18500.1, AT1G20200.1, AT1G22410.1, AT1G22780.1, AT1G22940.1, AT1G23410.1, AT1G24280.1, AT1G25490.1, AT1G26570.1, AT1G26910.2, AT1G27400.1, AT1G29150…	GO:1901564
26	⊕	GO:MF	GO:0043168	anion binding	1.26e-23	22.9	3296	441	149	4.52	AT1G01200.1, AT1G04170.1, AT1G06400.1, AT1G06430.1, AT1G06680.1, AT1G08520.1, AT1G08730.1, AT1G09100.1, AT1G10290.1, AT1G15710.1, AT1G18270.1, AT1G22940.1, AT1G25490.1, AT1G29900.1, AT1G32440.1, AT1G35720.1, AT1G36160.1, AT1G36180.1, AT1G45000.1, AT1G48470.1, AT1G51660.1, AT1G53780.1, AT1G55810.1, AT1G62940.1, AT1G63660.1, AT1G70580.1, AT1G72330.1, AT1G72730.1, AT1G72810.1, AT1G72970.1, AT1G73110…	GO:0043168
298	⊕	GO:BP	GO:0055086	nucleobase-containing small molecule metabolic process	1.8e-22	21.74	381	426	47	12.34	AT1G12230.1, AT1G16350.1, AT1G24280.1, AT1G26570.1, AT1G29900.1, AT1G36160.1, AT1G36180.1, AT1G36280.1, AT1G55810.1, AT1G59900.1, AT1G62940.1, AT1G63660.1, AT1G64190.1, AT1G74260.1, AT1G79470.1, AT2G19680.1, AT2G23420.1, AT2G38040.1, AT2G39770.1, AT2G47650.2, AT3G01390.1, AT3G08900.1, AT3G09820.1, AT3G13930.1, AT3G14790.1, AT3G16950.1, AT3G17810.1, AT3G20790.1, AT3G25860.1, AT3G29360.1, AT3G52300…	GO:0055086
292	⊕	GO:BP	GO:0019637	organophosphate metabolic process	9.68e-21	20.01	609	426	56	9.2	AT1G12230.1, AT1G16350.1, AT1G22940.1, AT1G24280.1, AT1G29900.1, AT1G32200.1, AT1G36160.1, AT1G36180.1, AT1G36280.1, AT1G55810.1, AT1G59900.1, AT1G62940.1, AT1G63660.1, AT1G64190.1, AT1G74260.1, AT1G79470.1, AT2G01690.1, AT2G19680.1, AT2G21170.1, AT2G22480.1, AT2G23420.1, AT2G29630.1, AT2G38040.1, AT2G38230.1, AT3G01390.1, AT3G02780.1, AT3G09820.1, AT3G13930.1, AT3G16950.1, AT3G20790.1, AT3G25860…	GO:0019637
5	⊕	GO:MF	GO:0017076	purine nucleotide binding	1.23e-20	19.91	2937	441	133	4.53	AT1G01200.1, AT1G04170.1, AT1G06400.1, AT1G06430.1, AT1G08520.1, AT1G08730.1, AT1G09100.1, AT1G10290.1, AT1G15710.1, AT1G18270.1, AT1G22940.1, AT1G24280.1, AT1G26570.1, AT1G29900.1, AT1G32440.1, AT1G35720.1, AT1G36160.1, AT1G36180.1, AT1G45000.1, AT1G48470.1, AT1G51660.1, AT1G53780.1, AT1G55810.1, AT1G62940.1, AT1G63660.1, AT1G64190.1, AT1G72730.1, AT1G73110.1, AT1G74260.1, AT1G75780.1, AT1G76550…	GO:0017076
44	⊕	GO:CC	GO:0009526	plastid envelope	3.39e-20	19.47	997	453	75	7.52	AT1G02560.1, AT1G06430.1, AT1G06680.1, AT1G09130.1, AT1G09340.1, AT1G11840.1, AT1G12230.1, AT1G16720.1, AT1G20630.1, AT1G23740.1, AT1G26910.2, AT1G48350.1, AT1G49970.1, AT1G52410.1, AT1G55480.1, AT1G64520.1, AT1G65260.1, AT1G66670.1, AT1G67700.1, AT1G73110.1, AT1G74040.2, AT1G76080.1, AT1G80380.1, AT2G17390.1, AT2G20260.1, AT2G21170.1, AT2G22360.1, AT2G25080.1, AT2G35490.1, AT2G36250.1, AT2G38040…	GO:0009526
256	⊕	GO:BP	GO:0006520	amino acid metabolic process	4.98e-20	19.3	457	426	48	10.5	AT1G09795.1, AT1G15710.1, AT1G18500.1, AT1G22410.1, AT1G29900.1, AT1G44542.1, AT1G48470.1, AT1G63660.1, AT1G70580.1, AT1G72330.1, AT1G72810.1, AT1G74040.2, AT1G74260.1, AT1G77670.1, AT2G04842.1, AT2G20860.1, AT2G27820.1, AT2G31170.1, AT2G38230.1, AT2G44040.1, AT3G02760.1, AT3G10050.1, AT3G17810.1, AT3G55610.1, AT3G57560.1, AT3G58140.1, AT3G58990.1, AT3G59970.3, AT3G61440.1, AT4G08870.1, AT4G08900…	GO:0006520
274	⊕	GO:BP	GO:1901135	carbohydrate derivative metabolic process	1.19e-19	18.93	740	426	60	8.11	AT1G11720.1, AT1G12230.1, AT1G16350.1, AT1G24280.1, AT1G26570.1, AT1G29900.1, AT1G36160.1, AT1G36180.1, AT1G36280.1, AT1G55810.1, AT1G59900.1, AT1G62940.1, AT1G63660.1, AT1G64190.1, AT1G74260.1, AT1G79470.1, AT2G19680.1, AT2G21170.1, AT2G22480.1, AT2G38040.1, AT2G39770.1, AT2G39930.1, AT2G47650.2, AT3G01390.1, AT3G08900.1, AT3G09820.1, AT3G13930.1, AT3G14790.1, AT3G16950.1, AT3G25860.1, AT3G29360…	GO:1901135
287	⊕	GO:BP	GO:0009117	nucleotide metabolic process	1.94e-19	18.71	282	426	38	13.48	AT1G12230.1, AT1G16350.1, AT1G24280.1, AT1G29900.1, AT1G36160.1, AT1G36180.1, AT1G36280.1, AT1G55810.1, AT1G59900.1, AT1G62940.1, AT1G63660.1, AT1G64190.1, AT1G74260.1, AT1G79470.1, AT2G19680.1, AT2G23420.1, AT2G38040.1, AT3G01390.1, AT3G09820.1, AT3G13930.1, AT3G16950.1, AT3G20790.1, AT3G25860.1, AT3G52300.1, AT3G53900.1, AT4G11820.1, AT4G12440.1, AT4G26510.1, AT4G26910.1, AT4G32180.1, AT5G13110…	GO:0009117
57	⊕	GO:CC	GO:0009941	chloroplast envelope	2.32e-19	18.63	701	453	61	8.7	AT1G02560.1, AT1G06430.1, AT1G06680.1, AT1G09130.1, AT1G09340.1, AT1G11840.1, AT1G12230.1, AT1G16720.1, AT1G20630.1, AT1G23740.1, AT1G26910.2, AT1G48350.1, AT1G49970.1, AT1G55480.1, AT1G64520.1, AT1G65260.1, AT1G66670.1, AT1G67700.1, AT1G74040.2, AT1G76080.1, AT1G80380.1, AT2G17390.1, AT2G20260.1, AT2G21170.1, AT2G22360.1, AT2G25080.1, AT2G38040.1, AT2G46820.1, AT2G47940.1, AT3G11630.1, AT3G13930…	GO:0009941
160	⊕	GO:BP	GO:0006091	generation of precursor metabolites and energy	7.33e-19	18.13	490	426	48	9.8	AT1G06680.1, AT1G12230.1, AT1G16720.1, AT1G24280.1, AT1G32440.1, AT1G55480.1, AT1G59900.1, AT1G64190.1, AT1G76550.1, AT2G18450.1, AT2G21170.1, AT2G22480.1, AT2G44350.1, AT2G46820.1, AT2G47940.1, AT3G04120.1, AT3G09810.1, AT3G13930.1, AT3G14940.1, AT3G20790.1, AT3G25860.1, AT3G52990.1, AT3G54050.1, AT3G55410.1, AT4G04020.1, AT4G21280.1, AT4G26270.1, AT4G26910.1, AT4G27520.1, AT4G29220.1, AT4G32840…	GO:0006091
301	⊕	GO:BP	GO:0006753	nucleoside phosphate metabolic process	8.25e-19	18.08	295	426	38	12.88	AT1G12230.1, AT1G16350.1, AT1G24280.1, AT1G29900.1, AT1G36160.1, AT1G36180.1, AT1G36280.1, AT1G55810.1, AT1G59900.1, AT1G62940.1, AT1G63660.1, AT1G64190.1, AT1G74260.1, AT1G79470.1, AT2G19680.1, AT2G23420.1, AT2G38040.1, AT3G01390.1, AT3G09820.1, AT3G13930.1, AT3G16950.1, AT3G20790.1, AT3G25860.1, AT3G52300.1, AT3G53900.1, AT4G11820.1, AT4G12440.1, AT4G26510.1, AT4G26910.1, AT4G32180.1, AT5G13110…	GO:0006753
294	⊕	GO:BP	GO:0006163	purine nucleotide metabolic process	3.54e-18	17.45	222	426	33	14.86	AT1G12230.1, AT1G16350.1, AT1G24280.1, AT1G36160.1, AT1G36180.1, AT1G36280.1, AT1G59900.1, AT1G62940.1, AT1G63660.1, AT1G64190.1, AT1G74260.1, AT1G79470.1, AT2G19680.1, AT2G23420.1, AT2G38040.1, AT3G01390.1, AT3G09820.1, AT3G13930.1, AT3G16950.1, AT3G20790.1, AT3G25860.1, AT3G52300.1, AT4G11820.1, AT4G12440.1, AT4G26910.1, AT4G32180.1, AT5G13110.1, AT5G24420.1, AT5G35790.1, AT5G36880.1, AT5G41670…	GO:0006163
290	⊕	GO:BP	GO:0072521	purine-containing compound metabolic process	5.73e-17	16.24	243	426	33	13.58	AT1G12230.1, AT1G16350.1, AT1G24280.1, AT1G36160.1, AT1G36180.1, AT1G36280.1, AT1G59900.1, AT1G62940.1, AT1G63660.1, AT1G64190.1, AT1G74260.1, AT1G79470.1, AT2G19680.1, AT2G23420.1, AT2G38040.1, AT3G01390.1, AT3G09820.1, AT3G13930.1, AT3G16950.1, AT3G20790.1, AT3G25860.1, AT3G52300.1, AT4G11820.1, AT4G12440.1, AT4G26910.1, AT4G32180.1, AT5G13110.1, AT5G24420.1, AT5G35790.1, AT5G36880.1, AT5G41670…	GO:0072521
54	⊕	GO:BP	GO:0008152	metabolic process	2.63e-16	15.58	13558	426	337	2.49	AT1G02560.1, AT1G03475.1, AT1G04170.1, AT1G04480.1, AT1G05180.1, AT1G06410.1, AT1G06430.1, AT1G06680.1, AT1G07250.1, AT1G07370.1, AT1G07890.1, AT1G08450.1, AT1G08520.1, AT1G09100.1, AT1G09130.1, AT1G09340.1, AT1G09795.1, AT1G11650.1, AT1G11720.1, AT1G11840.1, AT1G11910.1, AT1G12230.1, AT1G15470.1, AT1G15710.1, AT1G16350.1, AT1G16720.1, AT1G17720.1, AT1G18270.1, AT1G18450.1, AT1G18500.1, AT1G20200…	GO:0008152
53	⊕	GO:CC	GO:0009579	thylakoid	2.77e-16	15.56	602	453	52	8.64	AT1G02560.1, AT1G06430.1, AT1G06680.1, AT1G08520.1, AT1G09130.1, AT1G16720.1, AT1G23740.1, AT1G32220.1, AT1G35720.1, AT1G49970.1, AT1G52410.1, AT1G55480.1, AT1G65260.1, AT1G66670.1, AT1G67700.1, AT1G73110.1, AT2G20260.1, AT2G21170.1, AT2G22170.1, AT2G22360.1, AT2G25080.1, AT2G30860.1, AT2G35490.1, AT2G36250.1, AT2G44920.2, AT2G45770.1, AT2G46820.1, AT2G47940.1, AT3G11630.1, AT3G15520.1, AT3G25860…	GO:0009579
3	⊕	GO:MF	GO:0097367	carbohydrate derivative binding	1.38e-15	14.86	2863	441	120	4.19	AT1G01200.1, AT1G04170.1, AT1G06400.1, AT1G06430.1, AT1G08520.1, AT1G08730.1, AT1G09100.1, AT1G10290.1, AT1G18270.1, AT1G22940.1, AT1G29900.1, AT1G32440.1, AT1G35720.1, AT1G36160.1, AT1G36180.1, AT1G45000.1, AT1G48470.1, AT1G51660.1, AT1G53780.1, AT1G55810.1, AT1G62940.1, AT1G63660.1, AT1G72730.1, AT1G73110.1, AT1G74260.1, AT1G75780.1, AT1G76550.1, AT1G76730.1, AT1G79920.1, AT1G79930.1, AT1G80380…	GO:0097367
15	⊕	GO:BP	GO:0009987	cellular process	1.41e-15	14.85	15691	426	368	2.35	AT1G01200.1, AT1G03475.1, AT1G04170.1, AT1G04480.1, AT1G05180.1, AT1G06400.1, AT1G06410.1, AT1G06680.1, AT1G07250.1, AT1G07370.1, AT1G07890.1, AT1G08450.1, AT1G08520.1, AT1G08730.1, AT1G09100.1, AT1G09340.1, AT1G09795.1, AT1G10200.1, AT1G10290.1, AT1G10730.1, AT1G11650.1, AT1G11720.1, AT1G11840.1, AT1G12230.1, AT1G15470.1, AT1G15710.1, AT1G16350.1, AT1G16720.1, AT1G17720.1, AT1G18270.1, AT1G18450…	GO:0009987
315	⊕	GO:BP	GO:0009260	ribonucleotide biosynthetic process	1.47e-15	14.83	141	426	25	17.73	AT1G16350.1, AT1G29900.1, AT1G36160.1, AT1G36180.1, AT1G36280.1, AT1G55810.1, AT1G59900.1, AT1G62940.1, AT1G63660.1, AT1G74260.1, AT1G79470.1, AT2G19680.1, AT2G38040.1, AT3G01390.1, AT3G09820.1, AT3G13930.1, AT3G16950.1, AT3G25860.1, AT3G52300.1, AT3G53900.1, AT4G12440.1, AT4G26510.1, AT4G32180.1, AT5G36880.1, AT5G40870.1	GO:0009260
332	⊕	GO:BP	GO:0009259	ribonucleotide metabolic process	1.47e-15	14.83	186	426	28	15.05	AT1G16350.1, AT1G29900.1, AT1G36160.1, AT1G36180.1, AT1G36280.1, AT1G55810.1, AT1G59900.1, AT1G62940.1, AT1G63660.1, AT1G74260.1, AT1G79470.1, AT2G19680.1, AT2G38040.1, AT3G01390.1, AT3G09820.1, AT3G13930.1, AT3G16950.1, AT3G25860.1, AT3G52300.1, AT3G53900.1, AT4G11820.1, AT4G12440.1, AT4G26510.1, AT4G26910.1, AT4G32180.1, AT5G36880.1, AT5G40870.1, AT5G55070.1	GO:0009259
41	⊕	GO:CC	GO:0032991	protein-containing complex	2.02e-15	14.7	3458	453	145	4.19	AT1G02560.1, AT1G04170.1, AT1G04480.1, AT1G06680.1, AT1G07370.1, AT1G08520.1, AT1G08730.1, AT1G09100.1, AT1G09130.1, AT1G09340.1, AT1G10730.1, AT1G15470.1, AT1G16720.1, AT1G17720.1, AT1G18450.1, AT1G20200.1, AT1G22780.1, AT1G23410.1, AT1G25490.1, AT1G26910.2, AT1G27310.1, AT1G27400.1, AT1G29150.1, AT1G29900.1, AT1G30230.1, AT1G45000.1, AT1G47250.1, AT1G48350.1, AT1G48410.1, AT1G48630.1, AT1G48830…	GO:0032991
157	⊕	GO:MF	GO:0030554	adenyl nucleotide binding	2.43e-15	14.61	2666	441	114	4.28	AT1G06430.1, AT1G08520.1, AT1G08730.1, AT1G09100.1, AT1G15710.1, AT1G18270.1, AT1G22940.1, AT1G24280.1, AT1G26570.1, AT1G29900.1, AT1G32440.1, AT1G35720.1, AT1G36160.1, AT1G36180.1, AT1G45000.1, AT1G48470.1, AT1G51660.1, AT1G53780.1, AT1G55810.1, AT1G62940.1, AT1G63660.1, AT1G64190.1, AT1G72730.1, AT1G73110.1, AT1G74260.1, AT1G76550.1, AT1G76730.1, AT1G79920.1, AT1G79930.1, AT1G80380.1, AT2G04842…	GO:0030554
39	⊕	GO:MF	GO:0032553	ribonucleotide binding	2.6e-15	14.58	2821	441	118	4.18	AT1G01200.1, AT1G04170.1, AT1G06400.1, AT1G06430.1, AT1G08520.1, AT1G08730.1, AT1G09100.1, AT1G10290.1, AT1G18270.1, AT1G22940.1, AT1G29900.1, AT1G32440.1, AT1G35720.1, AT1G36160.1, AT1G36180.1, AT1G45000.1, AT1G48470.1, AT1G51660.1, AT1G53780.1, AT1G55810.1, AT1G62940.1, AT1G63660.1, AT1G72730.1, AT1G73110.1, AT1G74260.1, AT1G75780.1, AT1G76550.1, AT1G76730.1, AT1G79920.1, AT1G79930.1, AT1G80380…	GO:0032553
95	⊕	GO:BP	GO:0044237	cellular metabolic process	3.02e-15	14.52	10978	426	290	2.64	AT1G03475.1, AT1G04170.1, AT1G04480.1, AT1G05180.1, AT1G06680.1, AT1G07250.1, AT1G07370.1, AT1G07890.1, AT1G08450.1, AT1G08520.1, AT1G09100.1, AT1G09340.1, AT1G09795.1, AT1G11650.1, AT1G11720.1, AT1G11840.1, AT1G12230.1, AT1G15470.1, AT1G15710.1, AT1G16350.1, AT1G16720.1, AT1G17720.1, AT1G18270.1, AT1G18450.1, AT1G18500.1, AT1G20630.1, AT1G22410.1, AT1G22780.1, AT1G22940.1, AT1G23410.1, AT1G24280…	GO:0044237
328	⊕	GO:BP	GO:0046390	ribose phosphate biosynthetic process	3.02e-15	14.52	146	426	25	17.12	AT1G16350.1, AT1G29900.1, AT1G36160.1, AT1G36180.1, AT1G36280.1, AT1G55810.1, AT1G59900.1, AT1G62940.1, AT1G63660.1, AT1G74260.1, AT1G79470.1, AT2G19680.1, AT2G38040.1, AT3G01390.1, AT3G09820.1, AT3G13930.1, AT3G16950.1, AT3G25860.1, AT3G52300.1, AT3G53900.1, AT4G12440.1, AT4G26510.1, AT4G32180.1, AT5G36880.1, AT5G40870.1	GO:0046390
417	⊕	GO:BP	GO:0006090	pyruvate metabolic process	3.02e-15	14.52	93	426	21	22.58	AT1G32440.1, AT1G59900.1, AT1G76550.1, AT2G13560.1, AT2G21170.1, AT2G22480.1, AT3G04120.1, AT3G13930.1, AT3G16950.1, AT3G25860.1, AT3G52990.1, AT4G26270.1, AT4G29220.1, AT4G32840.1, AT4G38970.2, AT5G52920.1, AT5G56350.1, AT5G60600.2, AT5G61580.1, AT5G62790.1, AT5G63680.1	GO:0006090
47	⊕	GO:CC	GO:0031967	organelle envelope	3.14e-15	14.5	1511	453	85	5.63	AT1G02560.1, AT1G06430.1, AT1G06680.1, AT1G09130.1, AT1G09340.1, AT1G11840.1, AT1G12230.1, AT1G16720.1, AT1G20630.1, AT1G23740.1, AT1G26910.2, AT1G27310.1, AT1G48350.1, AT1G49970.1, AT1G52410.1, AT1G55480.1, AT1G64520.1, AT1G65260.1, AT1G66670.1, AT1G67700.1, AT1G73110.1, AT1G74040.2, AT1G76080.1, AT1G80380.1, AT2G17390.1, AT2G18450.1, AT2G19680.1, AT2G20260.1, AT2G21170.1, AT2G22360.1, AT2G25080…	GO:0031967
68	⊕	GO:CC	GO:0031975	envelope	3.14e-15	14.5	1511	453	85	5.63	AT1G02560.1, AT1G06430.1, AT1G06680.1, AT1G09130.1, AT1G09340.1, AT1G11840.1, AT1G12230.1, AT1G16720.1, AT1G20630.1, AT1G23740.1, AT1G26910.2, AT1G27310.1, AT1G48350.1, AT1G49970.1, AT1G52410.1, AT1G55480.1, AT1G64520.1, AT1G65260.1, AT1G66670.1, AT1G67700.1, AT1G73110.1, AT1G74040.2, AT1G76080.1, AT1G80380.1, AT2G17390.1, AT2G18450.1, AT2G19680.1, AT2G20260.1, AT2G21170.1, AT2G22360.1, AT2G25080…	GO:0031975
16	⊕	GO:MF	GO:0035639	purine ribonucleoside triphosphate binding	3.38e-15	14.47	2686	441	114	4.24	AT1G01200.1, AT1G04170.1, AT1G06400.1, AT1G06430.1, AT1G08520.1, AT1G08730.1, AT1G09100.1, AT1G10290.1, AT1G18270.1, AT1G22940.1, AT1G29900.1, AT1G32440.1, AT1G35720.1, AT1G36160.1, AT1G36180.1, AT1G45000.1, AT1G48470.1, AT1G51660.1, AT1G53780.1, AT1G55810.1, AT1G62940.1, AT1G63660.1, AT1G72730.1, AT1G73110.1, AT1G74260.1, AT1G75780.1, AT1G76550.1, AT1G76730.1, AT1G79920.1, AT1G79930.1, AT1G80380…	GO:0035639
65	⊕	GO:BP	GO:1901575	organic substance catabolic process	4.25e-15	14.37	1744	426	86	4.93	AT1G02560.1, AT1G06430.1, AT1G07890.1, AT1G08450.1, AT1G09100.1, AT1G09130.1, AT1G09340.1, AT1G11840.1, AT1G20200.1, AT1G20630.1, AT1G23410.1, AT1G29150.1, AT1G29660.1, AT1G32440.1, AT1G44542.1, AT1G45000.1, AT1G47250.1, AT1G49970.1, AT1G50670.1, AT1G51710.1, AT1G53780.1, AT1G59900.1, AT1G64190.1, AT1G64520.1, AT1G65650.1, AT1G66670.1, AT1G69940.1, AT1G70580.1, AT1G72330.1, AT1G75950.1, AT1G75990…	GO:1901575
320	⊕	GO:BP	GO:0019693	ribose phosphate metabolic process	4.25e-15	14.37	195	426	28	14.36	AT1G16350.1, AT1G29900.1, AT1G36160.1, AT1G36180.1, AT1G36280.1, AT1G55810.1, AT1G59900.1, AT1G62940.1, AT1G63660.1, AT1G74260.1, AT1G79470.1, AT2G19680.1, AT2G38040.1, AT3G01390.1, AT3G09820.1, AT3G13930.1, AT3G16950.1, AT3G25860.1, AT3G52300.1, AT3G53900.1, AT4G11820.1, AT4G12440.1, AT4G26510.1, AT4G26910.1, AT4G32180.1, AT5G36880.1, AT5G40870.1, AT5G55070.1	GO:0019693
254	⊕	GO:BP	GO:0044283	small molecule biosynthetic process	4.38e-15	14.36	745	426	53	7.11	AT1G09795.1, AT1G15710.1, AT1G18500.1, AT1G22410.1, AT1G22940.1, AT1G26570.1, AT1G29900.1, AT1G32220.1, AT1G36160.1, AT1G36180.1, AT1G48470.1, AT1G60550.1, AT1G72810.1, AT1G74040.2, AT1G74910.3, AT2G20860.1, AT2G21170.1, AT2G27820.1, AT2G29630.1, AT2G33150.1, AT2G38040.1, AT2G38230.1, AT2G39770.1, AT2G44040.1, AT3G04120.1, AT3G09820.1, AT3G10050.1, AT3G17810.1, AT3G29360.1, AT3G44300.1, AT3G54050…	GO:0044283
2	⊕	GO:MF	GO:0043167	ion binding	5.14e-15	14.29	6652	441	208	3.13	AT1G01200.1, AT1G04170.1, AT1G06400.1, AT1G06430.1, AT1G06640.1, AT1G06680.1, AT1G07890.1, AT1G08450.1, AT1G08520.1, AT1G08730.1, AT1G09100.1, AT1G09795.1, AT1G10200.1, AT1G10290.1, AT1G11840.1, AT1G12230.1, AT1G15710.1, AT1G16350.1, AT1G18270.1, AT1G18500.1, AT1G20630.1, AT1G22940.1, AT1G23410.1, AT1G23740.1, AT1G25490.1, AT1G29900.1, AT1G32440.1, AT1G35720.1, AT1G36160.1, AT1G36180.1, AT1G45000…	GO:0043167
296	⊕	KEGG	map01200	Carbon metabolism	9.91e-15	14	271	265	51	18.82	AT1G12230.1, AT1G20630.1, AT1G24280.1, AT1G32440.1, AT1G59900.1, AT1G64190.1, AT1G70580.1, AT1G72330.1, AT1G80380.1, AT2G13560.1, AT2G18450.1, AT2G21170.1, AT2G22480.1, AT2G38040.1, AT2G41530.1, AT2G44350.1, AT3G04120.1, AT3G09810.1, AT3G10050.1, AT3G13930.1, AT3G14940.1, AT3G15290.1, AT3G16950.1, AT3G25860.1, AT3G52990.1, AT3G54050.1, AT3G55410.1, AT3G59970.3, AT3G61440.1, AT4G16155.1, AT4G26270…	map01200
55	⊕	GO:CC	GO:0043232	intracellular non-membrane-bounded organelle	1.09e-14	13.96	2796	453	124	4.43	AT1G02560.1, AT1G04480.1, AT1G06430.1, AT1G06680.1, AT1G07370.1, AT1G08520.1, AT1G08730.1, AT1G09130.1, AT1G09340.1, AT1G10200.1, AT1G10290.1, AT1G16720.1, AT1G18450.1, AT1G20630.1, AT1G22780.1, AT1G23410.1, AT1G23740.1, AT1G26910.2, AT1G27400.1, AT1G32220.1, AT1G35720.1, AT1G45000.1, AT1G48350.1, AT1G48630.1, AT1G48830.1, AT1G49600.1, AT1G49970.1, AT1G52410.1, AT1G55480.1, AT1G65260.1, AT1G65650…	GO:0043232
67	⊕	GO:CC	GO:0043228	non-membrane-bounded organelle	1.09e-14	13.96	2796	453	124	4.43	AT1G02560.1, AT1G04480.1, AT1G06430.1, AT1G06680.1, AT1G07370.1, AT1G08520.1, AT1G08730.1, AT1G09130.1, AT1G09340.1, AT1G10200.1, AT1G10290.1, AT1G16720.1, AT1G18450.1, AT1G20630.1, AT1G22780.1, AT1G23410.1, AT1G23740.1, AT1G26910.2, AT1G27400.1, AT1G32220.1, AT1G35720.1, AT1G45000.1, AT1G48350.1, AT1G48630.1, AT1G48830.1, AT1G49600.1, AT1G49970.1, AT1G52410.1, AT1G55480.1, AT1G65260.1, AT1G65650…	GO:0043228
29	⊕	GO:MF	GO:0032555	purine ribonucleotide binding	1.74e-14	13.76	2794	441	115	4.12	AT1G01200.1, AT1G04170.1, AT1G06400.1, AT1G06430.1, AT1G08520.1, AT1G08730.1, AT1G09100.1, AT1G10290.1, AT1G18270.1, AT1G22940.1, AT1G29900.1, AT1G32440.1, AT1G35720.1, AT1G36160.1, AT1G36180.1, AT1G45000.1, AT1G48470.1, AT1G51660.1, AT1G53780.1, AT1G55810.1, AT1G62940.1, AT1G63660.1, AT1G72730.1, AT1G73110.1, AT1G74260.1, AT1G75780.1, AT1G76550.1, AT1G76730.1, AT1G79920.1, AT1G79930.1, AT1G80380…	GO:0032555
129	⊕	GO:MF	GO:0016874	ligase activity	1.74e-14	13.76	296	441	33	11.15	AT1G05180.1, AT1G08520.1, AT1G29900.1, AT1G36160.1, AT1G36180.1, AT1G48470.1, AT1G62940.1, AT1G63660.1, AT1G74260.1, AT2G04842.1, AT2G19680.1, AT2G23420.1, AT2G31170.1, AT2G38040.1, AT3G01390.1, AT3G02760.1, AT3G04480.1, AT3G52300.1, AT3G58140.1, AT4G13780.1, AT4G18480.1, AT4G33760.1, AT4G34030.1, AT5G05980.1, AT5G08300.1, AT5G13630.1, AT5G16715.1, AT5G23250.2, AT5G25590.1, AT5G27380.1, AT5G36880…	GO:0016874
336	⊕	GO:BP	GO:0090407	organophosphate biosynthetic process	6.21e-14	13.21	418	426	38	9.09	AT1G16350.1, AT1G22940.1, AT1G29900.1, AT1G32200.1, AT1G36160.1, AT1G36180.1, AT1G36280.1, AT1G55810.1, AT1G59900.1, AT1G62940.1, AT1G63660.1, AT1G74260.1, AT1G79470.1, AT2G01690.1, AT2G19680.1, AT2G21170.1, AT2G23420.1, AT2G29630.1, AT2G38040.1, AT2G38230.1, AT3G01390.1, AT3G02780.1, AT3G09820.1, AT3G13930.1, AT3G16950.1, AT3G25860.1, AT3G52300.1, AT3G53900.1, AT4G11820.1, AT4G12440.1, AT4G26510…	GO:0090407
331	⊕	GO:BP	GO:0009165	nucleotide biosynthetic process	7.35e-14	13.13	184	426	26	14.13	AT1G16350.1, AT1G29900.1, AT1G36160.1, AT1G36180.1, AT1G36280.1, AT1G55810.1, AT1G59900.1, AT1G62940.1, AT1G63660.1, AT1G74260.1, AT1G79470.1, AT2G19680.1, AT2G23420.1, AT2G38040.1, AT3G01390.1, AT3G09820.1, AT3G13930.1, AT3G16950.1, AT3G25860.1, AT3G52300.1, AT3G53900.1, AT4G12440.1, AT4G26510.1, AT4G32180.1, AT5G36880.1, AT5G40870.1	GO:0009165
70	⊕	GO:BP	GO:0009056	catabolic process	8.08e-14	13.09	1872	426	87	4.65	AT1G02560.1, AT1G06430.1, AT1G07890.1, AT1G08450.1, AT1G09100.1, AT1G09130.1, AT1G09340.1, AT1G11840.1, AT1G20200.1, AT1G20630.1, AT1G23410.1, AT1G29150.1, AT1G29660.1, AT1G32440.1, AT1G44542.1, AT1G45000.1, AT1G47250.1, AT1G49970.1, AT1G50670.1, AT1G51710.1, AT1G53780.1, AT1G59900.1, AT1G64190.1, AT1G64520.1, AT1G65650.1, AT1G66670.1, AT1G69940.1, AT1G70580.1, AT1G72330.1, AT1G75950.1, AT1G75990…	GO:0009056
318	⊕	GO:BP	GO:1901293	nucleoside phosphate biosynthetic process	1.02e-13	12.99	187	426	26	13.9	AT1G16350.1, AT1G29900.1, AT1G36160.1, AT1G36180.1, AT1G36280.1, AT1G55810.1, AT1G59900.1, AT1G62940.1, AT1G63660.1, AT1G74260.1, AT1G79470.1, AT2G19680.1, AT2G23420.1, AT2G38040.1, AT3G01390.1, AT3G09820.1, AT3G13930.1, AT3G16950.1, AT3G25860.1, AT3G52300.1, AT3G53900.1, AT4G12440.1, AT4G26510.1, AT4G32180.1, AT5G36880.1, AT5G40870.1	GO:1901293
235	⊕	GO:BP	GO:0016052	carbohydrate catabolic process	1.37e-13	12.86	301	426	32	10.63	AT1G09340.1, AT1G32440.1, AT1G59900.1, AT1G64190.1, AT1G69940.1, AT1G76550.1, AT1G78060.1, AT2G21170.1, AT2G22480.1, AT2G39930.1, AT2G40840.1, AT2G43050.1, AT3G01510.1, AT3G04120.1, AT3G10740.1, AT3G10940.1, AT3G13930.1, AT3G25860.1, AT3G52990.1, AT3G59010.1, AT4G26270.1, AT4G29220.1, AT4G32840.1, AT4G38970.2, AT5G41670.1, AT5G52920.1, AT5G53370.1, AT5G56350.1, AT5G61580.1, AT5G61680.1, AT5G63680…	GO:0016052
310	⊕	GO:BP	GO:1901605	alpha-amino acid metabolic process	2.01e-13	12.7	326	426	33	10.12	AT1G15710.1, AT1G18500.1, AT1G29900.1, AT1G44542.1, AT1G48470.1, AT1G63660.1, AT1G70580.1, AT1G72330.1, AT1G72810.1, AT1G74040.2, AT1G74260.1, AT1G77670.1, AT2G20860.1, AT2G27820.1, AT2G44040.1, AT3G10050.1, AT3G55610.1, AT3G57560.1, AT3G58990.1, AT3G59970.3, AT3G61440.1, AT4G08870.1, AT4G08900.1, AT4G19710.2, AT4G26910.1, AT4G30530.1, AT4G34030.1, AT5G13280.1, AT5G14060.1, AT5G16290.1, AT5G23010…	GO:1901605
322	⊕	GO:MF	GO:0016616	oxidoreductase activity, acting on the CH-OH group of donors, NAD or NADP as acceptor	2.2e-13	12.66	175	441	25	14.29	AT1G16350.1, AT1G24280.1, AT1G26570.1, AT1G60680.1, AT1G64190.1, AT1G79470.1, AT2G13560.1, AT2G24190.1, AT3G09810.1, AT3G15290.1, AT3G29360.1, AT4G19710.2, AT4G34230.1, AT4G35420.1, AT4G37990.1, AT5G03290.1, AT5G09660.3, AT5G13110.1, AT5G35790.1, AT5G39320.1, AT5G41670.1, AT5G51970.1, AT5G58330.1, AT5G58490.1, AT5G62790.1	GO:0016616
416	⊕	GO:BP	GO:0006096	glycolytic process	9.3e-13	12.03	72	426	17	23.61	AT1G32440.1, AT1G59900.1, AT1G76550.1, AT2G21170.1, AT2G22480.1, AT3G04120.1, AT3G13930.1, AT3G25860.1, AT3G52990.1, AT4G26270.1, AT4G29220.1, AT4G32840.1, AT4G38970.2, AT5G52920.1, AT5G56350.1, AT5G61580.1, AT5G63680.1	GO:0006096
40	⊕	GO:MF	GO:0097159	organic cyclic compound binding	1.7e-12	11.77	8676	441	242	2.79	AT1G01200.1, AT1G04170.1, AT1G04480.1, AT1G05180.1, AT1G06400.1, AT1G06430.1, AT1G06680.1, AT1G07370.1, AT1G07890.1, AT1G08520.1, AT1G08730.1, AT1G09100.1, AT1G09340.1, AT1G10200.1, AT1G10290.1, AT1G11650.1, AT1G15470.1, AT1G15710.1, AT1G16350.1, AT1G16720.1, AT1G18270.1, AT1G20630.1, AT1G22780.1, AT1G22940.1, AT1G23410.1, AT1G24280.1, AT1G25490.1, AT1G26570.1, AT1G27400.1, AT1G29030.1, AT1G29900…	GO:0097159
334	⊕	GO:MF	GO:0016614	oxidoreductase activity, acting on CH-OH group of donors	1.69e-12	11.77	209	441	26	12.44	AT1G16350.1, AT1G24280.1, AT1G26570.1, AT1G60680.1, AT1G64190.1, AT1G72970.1, AT1G79470.1, AT2G13560.1, AT2G24190.1, AT3G09810.1, AT3G15290.1, AT3G29360.1, AT4G19710.2, AT4G34230.1, AT4G35420.1, AT4G37990.1, AT5G03290.1, AT5G09660.3, AT5G13110.1, AT5G35790.1, AT5G39320.1, AT5G41670.1, AT5G51970.1, AT5G58330.1, AT5G58490.1, AT5G62790.1	GO:0016614
316	⊕	GO:BP	GO:0009150	purine ribonucleotide metabolic process	1.91e-12	11.72	160	426	23	14.37	AT1G16350.1, AT1G36160.1, AT1G36180.1, AT1G36280.1, AT1G59900.1, AT1G62940.1, AT1G63660.1, AT1G74260.1, AT1G79470.1, AT2G19680.1, AT2G38040.1, AT3G01390.1, AT3G09820.1, AT3G13930.1, AT3G16950.1, AT3G25860.1, AT3G52300.1, AT4G11820.1, AT4G12440.1, AT4G26910.1, AT4G32180.1, AT5G36880.1, AT5G55070.1	GO:0009150
300	⊕	GO:BP	GO:0006793	phosphorus metabolic process	2.03e-12	11.69	2167	426	92	4.25	AT1G12230.1, AT1G16350.1, AT1G17720.1, AT1G18270.1, AT1G22940.1, AT1G24280.1, AT1G25490.1, AT1G26570.1, AT1G29900.1, AT1G32200.1, AT1G32440.1, AT1G36160.1, AT1G36180.1, AT1G36280.1, AT1G48630.1, AT1G51660.1, AT1G55810.1, AT1G59900.1, AT1G62940.1, AT1G63660.1, AT1G64190.1, AT1G74260.1, AT1G76550.1, AT1G79470.1, AT1G80380.1, AT2G01690.1, AT2G19680.1, AT2G21170.1, AT2G22480.1, AT2G23420.1, AT2G29630…	GO:0006793
343	⊕	GO:BP	GO:0009152	purine ribonucleotide biosynthetic process	2.5e-12	11.6	116	426	20	17.24	AT1G16350.1, AT1G36160.1, AT1G36180.1, AT1G36280.1, AT1G59900.1, AT1G62940.1, AT1G63660.1, AT1G74260.1, AT1G79470.1, AT2G19680.1, AT2G38040.1, AT3G01390.1, AT3G09820.1, AT3G13930.1, AT3G16950.1, AT3G25860.1, AT3G52300.1, AT4G12440.1, AT4G32180.1, AT5G36880.1	GO:0009152
31	⊕	GO:MF	GO:0005488	binding	3.55e-12	11.45	15282	441	360	2.36	AT1G01200.1, AT1G02560.1, AT1G03475.1, AT1G04170.1, AT1G04480.1, AT1G05180.1, AT1G06400.1, AT1G06430.1, AT1G06640.1, AT1G06680.1, AT1G07370.1, AT1G07890.1, AT1G08450.1, AT1G08520.1, AT1G08730.1, AT1G09100.1, AT1G09130.1, AT1G09340.1, AT1G09795.1, AT1G10200.1, AT1G10290.1, AT1G11650.1, AT1G11720.1, AT1G11840.1, AT1G12230.1, AT1G15470.1, AT1G15710.1, AT1G16350.1, AT1G16720.1, AT1G17720.1, AT1G18270…	GO:0005488
319	⊕	GO:BP	GO:0006164	purine nucleotide biosynthetic process	4.02e-12	11.4	134	426	21	15.67	AT1G16350.1, AT1G36160.1, AT1G36180.1, AT1G36280.1, AT1G59900.1, AT1G62940.1, AT1G63660.1, AT1G74260.1, AT1G79470.1, AT2G19680.1, AT2G23420.1, AT2G38040.1, AT3G01390.1, AT3G09820.1, AT3G13930.1, AT3G16950.1, AT3G25860.1, AT3G52300.1, AT4G12440.1, AT4G32180.1, AT5G36880.1	GO:0006164
73	⊕	GO:BP	GO:0071704	organic substance metabolic process	4.29e-12	11.37	12778	426	312	2.44	AT1G02560.1, AT1G03475.1, AT1G04170.1, AT1G04480.1, AT1G05180.1, AT1G06410.1, AT1G06430.1, AT1G07250.1, AT1G07370.1, AT1G07890.1, AT1G08450.1, AT1G08520.1, AT1G09100.1, AT1G09130.1, AT1G09340.1, AT1G09795.1, AT1G11650.1, AT1G11720.1, AT1G11840.1, AT1G11910.1, AT1G12230.1, AT1G15470.1, AT1G15710.1, AT1G16350.1, AT1G16720.1, AT1G17720.1, AT1G18270.1, AT1G18450.1, AT1G18500.1, AT1G20200.1, AT1G20630…	GO:0071704
339	⊕	GO:BP	GO:0072522	purine-containing compound biosynthetic process	6.94e-12	11.16	138	426	21	15.22	AT1G16350.1, AT1G36160.1, AT1G36180.1, AT1G36280.1, AT1G59900.1, AT1G62940.1, AT1G63660.1, AT1G74260.1, AT1G79470.1, AT2G19680.1, AT2G23420.1, AT2G38040.1, AT3G01390.1, AT3G09820.1, AT3G13930.1, AT3G16950.1, AT3G25860.1, AT3G52300.1, AT4G12440.1, AT4G32180.1, AT5G36880.1	GO:0072522
373	⊕	GO:BP	GO:0006790	sulfur compound metabolic process	1.01e-11	11	332	426	31	9.34	AT1G22940.1, AT1G32500.1, AT1G36160.1, AT1G36180.1, AT1G59900.1, AT1G62940.1, AT1G72810.1, AT2G20860.1, AT2G29630.1, AT2G38040.1, AT3G13930.1, AT3G16950.1, AT3G24430.1, AT3G25860.1, AT3G58990.1, AT3G59970.3, AT3G61440.1, AT4G04770.1, AT4G11820.1, AT4G13940.3, AT4G19710.2, AT4G26910.1, AT4G30530.1, AT5G23010.1, AT5G36880.1, AT5G44070.1, AT5G49810.1, AT5G50960.1, AT5G55070.1, AT5G61220.1, AT5G65720…	GO:0006790
80	⊕	GO:MF	GO:0016491	oxidoreductase activity	1.12e-11	10.95	1566	441	74	4.73	AT1G03475.1, AT1G06640.1, AT1G07890.1, AT1G11840.1, AT1G15710.1, AT1G16350.1, AT1G18270.1, AT1G20630.1, AT1G23740.1, AT1G23800.1, AT1G24280.1, AT1G26570.1, AT1G35720.1, AT1G59900.1, AT1G60680.1, AT1G64190.1, AT1G72970.1, AT1G76080.1, AT1G79470.1, AT2G13560.1, AT2G18450.1, AT2G24190.1, AT2G25080.1, AT2G29300.1, AT2G29310.1, AT2G30860.1, AT2G31570.1, AT2G44040.1, AT3G04120.1, AT3G09810.1, AT3G11630…	GO:0016491
141	⊕	GO:BP	GO:0005975	carbohydrate metabolic process	3.09e-11	10.51	1123	426	59	5.25	AT1G06410.1, AT1G09340.1, AT1G11720.1, AT1G12230.1, AT1G18270.1, AT1G24280.1, AT1G30230.1, AT1G32440.1, AT1G51420.1, AT1G52400.1, AT1G59900.1, AT1G64190.1, AT1G69940.1, AT1G70820.1, AT1G74910.3, AT1G76550.1, AT1G78060.1, AT2G21170.1, AT2G22125.1, AT2G22480.1, AT2G39770.1, AT2G39930.1, AT2G40840.1, AT2G43050.1, AT2G44350.1, AT2G47650.2, AT3G01510.1, AT3G04120.1, AT3G04880.1, AT3G10740.1, AT3G10940…	GO:0005975
258	⊕	GO:BP	GO:0008652	amino acid biosynthetic process	3.41e-11	10.47	222	426	25	11.26	AT1G09795.1, AT1G15710.1, AT1G18500.1, AT1G22410.1, AT1G29900.1, AT1G48470.1, AT1G72810.1, AT1G74040.2, AT2G27820.1, AT2G44040.1, AT3G10050.1, AT3G17810.1, AT3G55610.1, AT3G57560.1, AT3G58990.1, AT3G59970.3, AT3G61440.1, AT4G19710.2, AT4G33510.1, AT4G39980.1, AT5G13280.1, AT5G14060.1, AT5G16290.1, AT5G23010.1, AT5G46180.1	GO:0008652
124	⊕	GO:MF	GO:0005198	structural molecule activity	3.57e-11	10.45	590	441	41	6.95	AT1G04480.1, AT1G18450.1, AT1G22780.1, AT1G23410.1, AT1G26910.2, AT1G27400.1, AT1G29150.1, AT1G48350.1, AT1G48630.1, AT1G48830.1, AT1G52360.1, AT1G75780.1, AT2G21390.1, AT2G36160.1, AT3G09630.1, AT3G11130.1, AT3G13120.1, AT3G18780.1, AT3G24830.1, AT3G25920.1, AT3G46040.1, AT3G49910.1, AT3G52300.1, AT3G56340.1, AT4G01310.1, AT4G11150.1, AT4G14960.1, AT4G20890.1, AT4G31700.2, AT4G34670.1, AT5G09510…	GO:0005198
177	⊕	GO:BP	GO:0032787	monocarboxylic acid metabolic process	3.69e-11	10.43	545	426	39	7.16	AT1G07250.1, AT1G11840.1, AT1G32440.1, AT1G36160.1, AT1G36180.1, AT1G52400.1, AT1G59900.1, AT1G62940.1, AT1G64190.1, AT1G72970.1, AT1G76550.1, AT2G13560.1, AT2G20860.1, AT2G21170.1, AT2G22480.1, AT2G33150.1, AT2G38040.1, AT3G04120.1, AT3G13930.1, AT3G15290.1, AT3G16950.1, AT3G25860.1, AT3G44300.1, AT3G52990.1, AT4G24510.1, AT4G26270.1, AT4G29220.1, AT4G32840.1, AT4G38970.2, AT5G09660.3, AT5G36880…	GO:0032787
252	⊕	GO:BP	GO:0046394	carboxylic acid biosynthetic process	4.58e-11	10.34	576	426	40	6.94	AT1G09795.1, AT1G15710.1, AT1G18500.1, AT1G22410.1, AT1G26570.1, AT1G29900.1, AT1G36160.1, AT1G36180.1, AT1G48470.1, AT1G72810.1, AT1G74040.2, AT1G74910.3, AT2G20860.1, AT2G27820.1, AT2G33150.1, AT2G38040.1, AT2G39770.1, AT2G44040.1, AT3G10050.1, AT3G17810.1, AT3G29360.1, AT3G44300.1, AT3G55610.1, AT3G57560.1, AT3G58990.1, AT3G59970.3, AT3G61440.1, AT4G19710.2, AT4G24510.1, AT4G33510.1, AT4G39980…	GO:0046394
253	⊕	GO:BP	GO:0016053	organic acid biosynthetic process	4.58e-11	10.34	576	426	40	6.94	AT1G09795.1, AT1G15710.1, AT1G18500.1, AT1G22410.1, AT1G26570.1, AT1G29900.1, AT1G36160.1, AT1G36180.1, AT1G48470.1, AT1G72810.1, AT1G74040.2, AT1G74910.3, AT2G20860.1, AT2G27820.1, AT2G33150.1, AT2G38040.1, AT2G39770.1, AT2G44040.1, AT3G10050.1, AT3G17810.1, AT3G29360.1, AT3G44300.1, AT3G55610.1, AT3G57560.1, AT3G58990.1, AT3G59970.3, AT3G61440.1, AT4G19710.2, AT4G24510.1, AT4G33510.1, AT4G39980…	GO:0016053
275	⊕	GO:BP	GO:1901137	carbohydrate derivative biosynthetic process	6.19e-11	10.21	478	426	36	7.53	AT1G11720.1, AT1G16350.1, AT1G26570.1, AT1G29900.1, AT1G36160.1, AT1G36180.1, AT1G36280.1, AT1G55810.1, AT1G59900.1, AT1G62940.1, AT1G63660.1, AT1G74260.1, AT1G79470.1, AT2G19680.1, AT2G21170.1, AT2G38040.1, AT2G39770.1, AT2G39930.1, AT2G47650.2, AT3G01390.1, AT3G09820.1, AT3G13930.1, AT3G14790.1, AT3G16950.1, AT3G25860.1, AT3G29360.1, AT3G52300.1, AT3G53900.1, AT3G58990.1, AT4G12440.1, AT4G26510…	GO:1901137
64	⊕	GO:CC	GO:1902494	catalytic complex	9.18e-11	10.04	1380	453	71	5.14	AT1G02560.1, AT1G06680.1, AT1G08520.1, AT1G09100.1, AT1G09130.1, AT1G09340.1, AT1G17720.1, AT1G18450.1, AT1G20200.1, AT1G25490.1, AT1G29150.1, AT1G29900.1, AT1G45000.1, AT1G47250.1, AT1G49970.1, AT1G51690.1, AT1G53780.1, AT1G64520.1, AT1G65650.1, AT1G66670.1, AT1G75950.1, AT1G75990.1, AT2G01690.1, AT2G18450.1, AT2G19680.1, AT2G20140.1, AT2G22125.1, AT2G27730.1, AT2G38040.1, AT2G39930.1, AT2G46290…	GO:1902494
11	⊕	GO:MF	GO:1901363	heterocyclic compound binding	1.05e-10	9.98	8634	441	235	2.72	AT1G01200.1, AT1G04170.1, AT1G04480.1, AT1G05180.1, AT1G06400.1, AT1G06430.1, AT1G06680.1, AT1G07370.1, AT1G07890.1, AT1G08520.1, AT1G08730.1, AT1G09100.1, AT1G09340.1, AT1G10200.1, AT1G10290.1, AT1G11650.1, AT1G15470.1, AT1G15710.1, AT1G16350.1, AT1G16720.1, AT1G18270.1, AT1G20630.1, AT1G22780.1, AT1G22940.1, AT1G23410.1, AT1G24280.1, AT1G26570.1, AT1G27400.1, AT1G29030.1, AT1G29900.1, AT1G30230…	GO:1901363
232	⊕	GO:CC	GO:0005739	mitochondrion	1.08e-10	9.97	1860	453	86	4.62	AT1G09130.1, AT1G16460.1, AT1G20630.1, AT1G23800.1, AT1G32220.1, AT1G35720.1, AT1G59900.1, AT1G67700.1, AT1G67930.1, AT1G70580.1, AT1G72330.1, AT1G72730.1, AT1G73110.1, AT1G74260.1, AT1G75950.1, AT1G75990.1, AT1G76080.1, AT1G76180.1, AT1G76550.1, AT1G76730.1, AT1G78060.1, AT1G79470.1, AT1G79930.1, AT1G80380.1, AT2G01690.1, AT2G04520.1, AT2G04842.1, AT2G13560.1, AT2G17390.1, AT2G17790.1, AT2G18450…	GO:0005739
151	⊕	GO:MF	GO:0005524	ATP binding	1.24e-10	9.91	2415	441	95	3.93	AT1G06430.1, AT1G08520.1, AT1G08730.1, AT1G09100.1, AT1G18270.1, AT1G22940.1, AT1G29900.1, AT1G32440.1, AT1G35720.1, AT1G36160.1, AT1G36180.1, AT1G45000.1, AT1G48470.1, AT1G51660.1, AT1G53780.1, AT1G55810.1, AT1G62940.1, AT1G63660.1, AT1G72730.1, AT1G73110.1, AT1G74260.1, AT1G76550.1, AT1G76730.1, AT1G79920.1, AT1G79930.1, AT1G80380.1, AT2G04842.1, AT2G13560.1, AT2G20140.1, AT2G22360.1, AT2G22480…	GO:0005524
34	⊕	GO:CC	GO:0110165	cellular anatomical entity	2.36e-10	9.63	19606	453	450	2.3	AT1G01200.1, AT1G02560.1, AT1G03475.1, AT1G04170.1, AT1G04480.1, AT1G05180.1, AT1G06400.1, AT1G06430.1, AT1G06680.1, AT1G07370.1, AT1G07890.1, AT1G08450.1, AT1G08520.1, AT1G08730.1, AT1G09100.1, AT1G09130.1, AT1G09310.1, AT1G09340.1, AT1G09795.1, AT1G10200.1, AT1G10290.1, AT1G10730.1, AT1G11650.1, AT1G11720.1, AT1G11840.1, AT1G11910.1, AT1G12230.1, AT1G15470.1, AT1G15710.1, AT1G16350.1, AT1G16460…	GO:0110165
74	⊕	GO:CC	GO:0009534	chloroplast thylakoid	2.36e-10	9.63	522	453	39	7.47	AT1G02560.1, AT1G06430.1, AT1G06680.1, AT1G08520.1, AT1G16720.1, AT1G49970.1, AT1G52410.1, AT1G55480.1, AT1G65260.1, AT1G66670.1, AT1G67700.1, AT1G73110.1, AT2G20260.1, AT2G22360.1, AT2G25080.1, AT2G35490.1, AT2G36250.1, AT2G44920.2, AT2G45770.1, AT2G46820.1, AT2G47940.1, AT3G15520.1, AT3G25860.1, AT3G46780.1, AT3G52150.1, AT3G52300.1, AT3G55330.1, AT3G57560.1, AT3G63160.1, AT4G04020.1, AT4G14210…	GO:0009534
62	⊕	GO:CC	GO:0031976	plastid thylakoid	2.46e-10	9.61	524	453	39	7.44	AT1G02560.1, AT1G06430.1, AT1G06680.1, AT1G08520.1, AT1G16720.1, AT1G49970.1, AT1G52410.1, AT1G55480.1, AT1G65260.1, AT1G66670.1, AT1G67700.1, AT1G73110.1, AT2G20260.1, AT2G22360.1, AT2G25080.1, AT2G35490.1, AT2G36250.1, AT2G44920.2, AT2G45770.1, AT2G46820.1, AT2G47940.1, AT3G15520.1, AT3G25860.1, AT3G46780.1, AT3G52150.1, AT3G52300.1, AT3G55330.1, AT3G57560.1, AT3G63160.1, AT4G04020.1, AT4G14210…	GO:0031976
219	⊕	GO:CC	GO:0022624	proteasome accessory complex	3.07e-10	9.51	31	453	11	35.48	AT1G09100.1, AT1G20200.1, AT1G29150.1, AT1G45000.1, AT1G64520.1, AT1G75990.1, AT2G20140.1, AT3G11270.1, AT5G09900.1, AT5G23540.1, AT5G64760.1	GO:0022624
221	⊕	GO:CC	GO:0005838	proteasome regulatory particle	3.07e-10	9.51	31	453	11	35.48	AT1G09100.1, AT1G20200.1, AT1G29150.1, AT1G45000.1, AT1G64520.1, AT1G75990.1, AT2G20140.1, AT3G11270.1, AT5G09900.1, AT5G23540.1, AT5G64760.1	GO:0005838
285	⊕	GO:BP	GO:0006796	phosphate-containing compound metabolic process	4.22e-10	9.37	2124	426	85	4	AT1G12230.1, AT1G16350.1, AT1G17720.1, AT1G18270.1, AT1G22940.1, AT1G24280.1, AT1G25490.1, AT1G29900.1, AT1G32200.1, AT1G32440.1, AT1G36160.1, AT1G36180.1, AT1G36280.1, AT1G48630.1, AT1G51660.1, AT1G55810.1, AT1G59900.1, AT1G62940.1, AT1G63660.1, AT1G64190.1, AT1G74260.1, AT1G76550.1, AT1G79470.1, AT1G80380.1, AT2G01690.1, AT2G19680.1, AT2G21170.1, AT2G22480.1, AT2G23420.1, AT2G29630.1, AT2G30940…	GO:0006796
152	⊕	GO:MF	GO:0032559	adenyl ribonucleotide binding	5.88e-10	9.23	2523	441	96	3.8	AT1G06430.1, AT1G08520.1, AT1G08730.1, AT1G09100.1, AT1G18270.1, AT1G22940.1, AT1G29900.1, AT1G32440.1, AT1G35720.1, AT1G36160.1, AT1G36180.1, AT1G45000.1, AT1G48470.1, AT1G51660.1, AT1G53780.1, AT1G55810.1, AT1G62940.1, AT1G63660.1, AT1G72730.1, AT1G73110.1, AT1G74260.1, AT1G76550.1, AT1G76730.1, AT1G79920.1, AT1G79930.1, AT1G80380.1, AT2G04842.1, AT2G13560.1, AT2G20140.1, AT2G22360.1, AT2G22480…	GO:0032559
325	⊕	GO:BP	GO:0009156	ribonucleoside monophosphate biosynthetic process	1.02e-09	8.99	45	426	12	26.67	AT1G16350.1, AT1G29900.1, AT1G36280.1, AT1G55810.1, AT1G63660.1, AT1G74260.1, AT1G79470.1, AT3G09820.1, AT3G53900.1, AT4G12440.1, AT4G26510.1, AT5G40870.1	GO:0009156
255	⊕	KEGG	map01230	Biosynthesis of amino acids	1.22e-09	8.91	242	265	40	16.53	AT1G09795.1, AT1G12230.1, AT1G15710.1, AT1G18500.1, AT1G22410.1, AT1G32440.1, AT1G48470.1, AT1G70580.1, AT1G72330.1, AT1G72810.1, AT1G74040.2, AT2G21170.1, AT2G22480.1, AT2G27820.1, AT2G44040.1, AT2G44350.1, AT3G04120.1, AT3G09810.1, AT3G10050.1, AT3G52990.1, AT3G55610.1, AT3G57560.1, AT3G61440.1, AT4G08870.1, AT4G08900.1, AT4G19710.2, AT4G26270.1, AT4G29220.1, AT4G32840.1, AT4G33510.1, AT4G38970…	map01230
110	⊕	GO:BP	GO:0043603	amide metabolic process	1.28e-09	8.89	1689	426	72	4.26	AT1G04170.1, AT1G04480.1, AT1G09340.1, AT1G16720.1, AT1G22780.1, AT1G23410.1, AT1G26910.2, AT1G27400.1, AT1G30230.1, AT1G36160.1, AT1G36180.1, AT1G48350.1, AT1G48410.1, AT1G48630.1, AT1G48830.1, AT1G59900.1, AT1G62940.1, AT1G72730.1, AT2G04520.1, AT2G04842.1, AT2G27040.1, AT2G31170.1, AT2G36160.1, AT2G38040.1, AT2G45810.1, AT2G46290.1, AT3G02760.1, AT3G09630.1, AT3G12915.1, AT3G13120.1, AT3G13930…	GO:0043603
190	⊕	GO:CC	GO:0070161	anchoring junction	1.96e-09	8.71	916	453	52	5.68	AT1G07890.1, AT1G09340.1, AT1G10290.1, AT1G11910.1, AT1G20200.1, AT1G22780.1, AT1G23410.1, AT1G27400.1, AT1G29150.1, AT1G35720.1, AT1G45000.1, AT1G47250.1, AT1G48470.1, AT1G51710.1, AT1G52400.1, AT1G78060.1, AT2G22125.1, AT2G30860.1, AT2G36160.1, AT2G43800.1, AT2G44060.1, AT2G46290.1, AT3G08900.1, AT3G09630.1, AT3G09820.1, AT3G11130.1, AT3G14790.1, AT3G20820.1, AT3G24830.1, AT3G55610.1, AT4G11820…	GO:0070161
200	⊕	GO:CC	GO:0009506	plasmodesma	1.96e-09	8.71	916	453	52	5.68	AT1G07890.1, AT1G09340.1, AT1G10290.1, AT1G11910.1, AT1G20200.1, AT1G22780.1, AT1G23410.1, AT1G27400.1, AT1G29150.1, AT1G35720.1, AT1G45000.1, AT1G47250.1, AT1G48470.1, AT1G51710.1, AT1G52400.1, AT1G78060.1, AT2G22125.1, AT2G30860.1, AT2G36160.1, AT2G43800.1, AT2G44060.1, AT2G46290.1, AT3G08900.1, AT3G09630.1, AT3G09820.1, AT3G11130.1, AT3G14790.1, AT3G20820.1, AT3G24830.1, AT3G55610.1, AT4G11820…	GO:0009506
202	⊕	GO:CC	GO:0030054	cell junction	1.96e-09	8.71	916	453	52	5.68	AT1G07890.1, AT1G09340.1, AT1G10290.1, AT1G11910.1, AT1G20200.1, AT1G22780.1, AT1G23410.1, AT1G27400.1, AT1G29150.1, AT1G35720.1, AT1G45000.1, AT1G47250.1, AT1G48470.1, AT1G51710.1, AT1G52400.1, AT1G78060.1, AT2G22125.1, AT2G30860.1, AT2G36160.1, AT2G43800.1, AT2G44060.1, AT2G46290.1, AT3G08900.1, AT3G09630.1, AT3G09820.1, AT3G11130.1, AT3G14790.1, AT3G20820.1, AT3G24830.1, AT3G55610.1, AT4G11820…	GO:0030054
205	⊕	GO:CC	GO:0005911	cell-cell junction	1.96e-09	8.71	916	453	52	5.68	AT1G07890.1, AT1G09340.1, AT1G10290.1, AT1G11910.1, AT1G20200.1, AT1G22780.1, AT1G23410.1, AT1G27400.1, AT1G29150.1, AT1G35720.1, AT1G45000.1, AT1G47250.1, AT1G48470.1, AT1G51710.1, AT1G52400.1, AT1G78060.1, AT2G22125.1, AT2G30860.1, AT2G36160.1, AT2G43800.1, AT2G44060.1, AT2G46290.1, AT3G08900.1, AT3G09630.1, AT3G09820.1, AT3G11130.1, AT3G14790.1, AT3G20820.1, AT3G24830.1, AT3G55610.1, AT4G11820…	GO:0005911
76	⊕	KEGG	map01100	Metabolic pathways	1.98e-09	8.7	2335	265	173	7.41	AT1G03475.1, AT1G06410.1, AT1G06680.1, AT1G07890.1, AT1G08520.1, AT1G09795.1, AT1G11720.1, AT1G11840.1, AT1G12230.1, AT1G15710.1, AT1G16350.1, AT1G16460.1, AT1G18500.1, AT1G20630.1, AT1G22410.1, AT1G22940.1, AT1G23800.1, AT1G24280.1, AT1G26570.1, AT1G29900.1, AT1G32200.1, AT1G32440.1, AT1G36160.1, AT1G36180.1, AT1G36280.1, AT1G48470.1, AT1G55810.1, AT1G59900.1, AT1G60550.1, AT1G62940.1, AT1G63660…	map01100
199	⊕	GO:CC	GO:0055044	symplast	1.98e-09	8.7	917	453	52	5.67	AT1G07890.1, AT1G09340.1, AT1G10290.1, AT1G11910.1, AT1G20200.1, AT1G22780.1, AT1G23410.1, AT1G27400.1, AT1G29150.1, AT1G35720.1, AT1G45000.1, AT1G47250.1, AT1G48470.1, AT1G51710.1, AT1G52400.1, AT1G78060.1, AT2G22125.1, AT2G30860.1, AT2G36160.1, AT2G43800.1, AT2G44060.1, AT2G46290.1, AT3G08900.1, AT3G09630.1, AT3G09820.1, AT3G11130.1, AT3G14790.1, AT3G20820.1, AT3G24830.1, AT3G55610.1, AT4G11820…	GO:0055044
558	⊕	GO:BP	GO:0006099	tricarboxylic acid cycle	2.52e-09	8.6	60	426	13	21.67	AT2G18450.1, AT2G44350.1, AT3G09810.1, AT3G14940.1, AT3G55410.1, AT4G26910.1, AT5G03290.1, AT5G08300.1, AT5G09660.3, AT5G23250.2, AT5G55070.1, AT5G58330.1, AT5G66760.1	GO:0006099
321	⊕	GO:BP	GO:0009161	ribonucleoside monophosphate metabolic process	2.89e-09	8.54	49	426	12	24.49	AT1G16350.1, AT1G29900.1, AT1G36280.1, AT1G55810.1, AT1G63660.1, AT1G74260.1, AT1G79470.1, AT3G09820.1, AT3G53900.1, AT4G12440.1, AT4G26510.1, AT5G40870.1	GO:0009161
111	⊕	GO:BP	GO:0043604	amide biosynthetic process	3.02e-09	8.52	1579	426	68	4.31	AT1G04170.1, AT1G04480.1, AT1G09340.1, AT1G16720.1, AT1G22780.1, AT1G23410.1, AT1G26910.2, AT1G27400.1, AT1G30230.1, AT1G36160.1, AT1G36180.1, AT1G48350.1, AT1G48410.1, AT1G48630.1, AT1G48830.1, AT1G59900.1, AT1G62940.1, AT1G72730.1, AT2G04520.1, AT2G04842.1, AT2G27040.1, AT2G31170.1, AT2G36160.1, AT2G38040.1, AT2G45810.1, AT2G46290.1, AT3G02760.1, AT3G09630.1, AT3G12915.1, AT3G13120.1, AT3G13930…	GO:0043604
327	⊕	GO:BP	GO:0009124	nucleoside monophosphate biosynthetic process	5.68e-09	8.25	52	426	12	23.08	AT1G16350.1, AT1G29900.1, AT1G36280.1, AT1G55810.1, AT1G63660.1, AT1G74260.1, AT1G79470.1, AT3G09820.1, AT3G53900.1, AT4G12440.1, AT4G26510.1, AT5G40870.1	GO:0009124
423	⊕	GO:BP	GO:0006637	acyl-CoA metabolic process	5.68e-09	8.25	52	426	12	23.08	AT1G36160.1, AT1G36180.1, AT1G59900.1, AT1G62940.1, AT2G38040.1, AT3G13930.1, AT3G16950.1, AT3G25860.1, AT4G11820.1, AT4G26910.1, AT5G36880.1, AT5G55070.1	GO:0006637
424	⊕	GO:BP	GO:0035383	thioester metabolic process	5.68e-09	8.25	52	426	12	23.08	AT1G36160.1, AT1G36180.1, AT1G59900.1, AT1G62940.1, AT2G38040.1, AT3G13930.1, AT3G16950.1, AT3G25860.1, AT4G11820.1, AT4G26910.1, AT5G36880.1, AT5G55070.1	GO:0035383
222	⊕	GO:CC	GO:0000502	proteasome complex	8.09e-09	8.09	76	453	14	18.42	AT1G09100.1, AT1G20200.1, AT1G29150.1, AT1G45000.1, AT1G47250.1, AT1G53780.1, AT1G64520.1, AT1G75990.1, AT2G20140.1, AT3G11270.1, AT3G22630.1, AT5G09900.1, AT5G23540.1, AT5G64760.1	GO:0000502
128	⊕	GO:CC	GO:0005840	ribosome	1.05e-08	7.98	525	453	36	6.86	AT1G04480.1, AT1G09340.1, AT1G20630.1, AT1G22780.1, AT1G23410.1, AT1G26910.2, AT1G27400.1, AT1G48350.1, AT1G48630.1, AT1G48830.1, AT2G36160.1, AT3G09630.1, AT3G12915.1, AT3G13120.1, AT3G24830.1, AT3G25860.1, AT3G25920.1, AT3G46040.1, AT3G49910.1, AT3G52150.1, AT3G52300.1, AT3G56340.1, AT4G01310.1, AT4G11150.1, AT4G31700.2, AT4G34670.1, AT5G09510.1, AT5G13510.1, AT5G14320.1, AT5G16130.1, AT5G30510…	GO:0005840
379	⊕	GO:BP	GO:0044272	sulfur compound biosynthetic process	1.35e-08	7.87	168	426	19	11.31	AT1G22940.1, AT1G36160.1, AT1G36180.1, AT1G59900.1, AT1G62940.1, AT1G72810.1, AT2G20860.1, AT2G29630.1, AT2G38040.1, AT3G13930.1, AT3G16950.1, AT3G25860.1, AT3G58990.1, AT3G59970.3, AT3G61440.1, AT4G19710.2, AT4G30530.1, AT5G23010.1, AT5G36880.1	GO:0044272
429	⊕	GO:BP	GO:0035384	thioester biosynthetic process	1.35e-08	7.87	25	426	9	36	AT1G36160.1, AT1G36180.1, AT1G59900.1, AT1G62940.1, AT2G38040.1, AT3G13930.1, AT3G16950.1, AT3G25860.1, AT5G36880.1	GO:0035384
435	⊕	GO:BP	GO:0071616	acyl-CoA biosynthetic process	1.35e-08	7.87	25	426	9	36	AT1G36160.1, AT1G36180.1, AT1G59900.1, AT1G62940.1, AT2G38040.1, AT3G13930.1, AT3G16950.1, AT3G25860.1, AT5G36880.1	GO:0071616
422	⊕	GO:BP	GO:0034032	purine nucleoside bisphosphate metabolic process	1.6e-08	7.8	70	426	13	18.57	AT1G36160.1, AT1G36180.1, AT1G59900.1, AT1G62940.1, AT2G38040.1, AT3G13930.1, AT3G16950.1, AT3G25860.1, AT4G11820.1, AT4G26910.1, AT4G32180.1, AT5G36880.1, AT5G55070.1	GO:0034032
430	⊕	GO:BP	GO:0033875	ribonucleoside bisphosphate metabolic process	1.6e-08	7.8	70	426	13	18.57	AT1G36160.1, AT1G36180.1, AT1G59900.1, AT1G62940.1, AT2G38040.1, AT3G13930.1, AT3G16950.1, AT3G25860.1, AT4G11820.1, AT4G26910.1, AT4G32180.1, AT5G36880.1, AT5G55070.1	GO:0033875
436	⊕	GO:BP	GO:0033865	nucleoside bisphosphate metabolic process	1.6e-08	7.8	70	426	13	18.57	AT1G36160.1, AT1G36180.1, AT1G59900.1, AT1G62940.1, AT2G38040.1, AT3G13930.1, AT3G16950.1, AT3G25860.1, AT4G11820.1, AT4G26910.1, AT4G32180.1, AT5G36880.1, AT5G55070.1	GO:0033865
302	⊕	GO:BP	GO:1901607	alpha-amino acid biosynthetic process	2.09e-08	7.68	193	426	20	10.36	AT1G15710.1, AT1G18500.1, AT1G29900.1, AT1G48470.1, AT1G72810.1, AT1G74040.2, AT2G27820.1, AT2G44040.1, AT3G10050.1, AT3G55610.1, AT3G57560.1, AT3G58990.1, AT3G59970.3, AT3G61440.1, AT4G19710.2, AT5G13280.1, AT5G14060.1, AT5G16290.1, AT5G23010.1, AT5G46180.1	GO:1901607
228	⊕	GO:CC	GO:1905369	endopeptidase complex	2.17e-08	7.66	82	453	14	17.07	AT1G09100.1, AT1G20200.1, AT1G29150.1, AT1G45000.1, AT1G47250.1, AT1G53780.1, AT1G64520.1, AT1G75990.1, AT2G20140.1, AT3G11270.1, AT3G22630.1, AT5G09900.1, AT5G23540.1, AT5G64760.1	GO:1905369
119	⊕	GO:MF	GO:0003735	structural constituent of ribosome	2.56e-08	7.59	425	441	30	7.06	AT1G04480.1, AT1G22780.1, AT1G23410.1, AT1G26910.2, AT1G27400.1, AT1G48350.1, AT1G48630.1, AT1G48830.1, AT2G36160.1, AT3G09630.1, AT3G13120.1, AT3G24830.1, AT3G25920.1, AT3G46040.1, AT3G49910.1, AT3G52300.1, AT3G56340.1, AT4G01310.1, AT4G11150.1, AT4G31700.2, AT4G34670.1, AT5G09510.1, AT5G13510.1, AT5G14320.1, AT5G16130.1, AT5G30510.1, AT5G41520.1, ATCG00380.1, ATCG00770.1, ATCG00790.1	GO:0003735
98	⊕	GO:BP	GO:0009058	biosynthetic process	3.12e-08	7.51	7871	426	207	2.63	AT1G03475.1, AT1G04170.1, AT1G04480.1, AT1G06410.1, AT1G07370.1, AT1G07890.1, AT1G08450.1, AT1G08520.1, AT1G09100.1, AT1G09340.1, AT1G09795.1, AT1G11650.1, AT1G11720.1, AT1G15470.1, AT1G15710.1, AT1G16350.1, AT1G16720.1, AT1G18450.1, AT1G18500.1, AT1G22410.1, AT1G22780.1, AT1G22940.1, AT1G23410.1, AT1G26570.1, AT1G26910.2, AT1G27400.1, AT1G29900.1, AT1G30230.1, AT1G32200.1, AT1G32220.1, AT1G36160…	GO:0009058
364	⊕	GO:CC	GO:0008541	proteasome regulatory particle, lid subcomplex	3.1e-08	7.51	13	453	7	53.85	AT1G20200.1, AT1G29150.1, AT1G64520.1, AT1G75990.1, AT5G09900.1, AT5G23540.1, AT5G64760.1	GO:0008541
51	⊕	GO:MF	GO:0140657	ATP-dependent activity	3.17e-08	7.5	802	441	43	5.36	AT1G02560.1, AT1G05180.1, AT1G06430.1, AT1G08730.1, AT1G09100.1, AT1G09130.1, AT1G45000.1, AT1G49970.1, AT1G53780.1, AT1G62940.1, AT1G66670.1, AT1G72730.1, AT1G73110.1, AT1G79920.1, AT1G79930.1, AT2G20140.1, AT2G34560.1, AT2G42520.1, AT2G45810.1, AT3G01390.1, AT3G08560.1, AT3G10270.1, AT3G10690.1, AT3G24430.1, AT3G42050.1, AT3G53110.1, AT3G61240.1, AT4G04770.1, AT4G11150.1, AT4G18480.1, AT4G19210…	GO:0140657
83	⊕	KEGG	map01110	Biosynthesis of secondary metabolites	3.31e-08	7.48	1276	265	110	8.62	AT1G03475.1, AT1G06410.1, AT1G08520.1, AT1G09795.1, AT1G11720.1, AT1G12230.1, AT1G15710.1, AT1G16350.1, AT1G18500.1, AT1G20630.1, AT1G22360.1, AT1G22410.1, AT1G23800.1, AT1G24280.1, AT1G32440.1, AT1G36160.1, AT1G36180.1, AT1G36280.1, AT1G51420.1, AT1G52400.1, AT1G59900.1, AT1G60550.1, AT1G62940.1, AT1G64190.1, AT1G70580.1, AT1G72810.1, AT1G74040.2, AT1G74260.1, AT1G74910.3, AT1G76550.1, AT1G79470…	map01110
46	⊕	GO:BP	GO:0044238	primary metabolic process	3.94e-08	7.4	11857	426	282	2.38	AT1G02560.1, AT1G04170.1, AT1G04480.1, AT1G05180.1, AT1G06410.1, AT1G06430.1, AT1G07250.1, AT1G07370.1, AT1G08450.1, AT1G09100.1, AT1G09130.1, AT1G09340.1, AT1G09795.1, AT1G11650.1, AT1G11720.1, AT1G11910.1, AT1G12230.1, AT1G15470.1, AT1G15710.1, AT1G16350.1, AT1G16720.1, AT1G17720.1, AT1G18270.1, AT1G18450.1, AT1G18500.1, AT1G20200.1, AT1G22410.1, AT1G22780.1, AT1G23410.1, AT1G24280.1, AT1G25490…	GO:0044238
280	⊕	KEGG	map00620	Pyruvate metabolism	4.11e-08	7.39	96	265	22	22.92	AT1G11840.1, AT1G18500.1, AT1G23800.1, AT1G32440.1, AT1G36160.1, AT1G36180.1, AT1G59900.1, AT1G74040.2, AT2G13560.1, AT2G38040.1, AT3G13930.1, AT3G14940.1, AT3G16950.1, AT3G25860.1, AT3G52990.1, AT4G16155.1, AT5G09660.3, AT5G36880.1, AT5G52920.1, AT5G56350.1, AT5G58330.1, AT5G63680.1	map00620
123	⊕	GO:CC	GO:0022626	cytosolic ribosome	4.85e-08	7.31	314	453	26	8.28	AT1G04480.1, AT1G20630.1, AT1G22780.1, AT1G23410.1, AT1G26910.2, AT1G27400.1, AT1G48630.1, AT1G48830.1, AT2G36160.1, AT3G09630.1, AT3G24830.1, AT3G25860.1, AT3G25920.1, AT3G46040.1, AT3G49910.1, AT3G52300.1, AT3G56340.1, AT4G01310.1, AT4G11150.1, AT4G31700.2, AT4G34670.1, AT5G09510.1, AT5G13510.1, AT5G16130.1, AT5G41520.1, AT5G55070.1	GO:0022626
433	⊕	GO:BP	GO:0034033	purine nucleoside bisphosphate biosynthetic process	5.23e-08	7.28	39	426	10	25.64	AT1G36160.1, AT1G36180.1, AT1G59900.1, AT1G62940.1, AT2G38040.1, AT3G13930.1, AT3G16950.1, AT3G25860.1, AT4G32180.1, AT5G36880.1	GO:0034033
434	⊕	GO:BP	GO:0034030	ribonucleoside bisphosphate biosynthetic process	5.23e-08	7.28	39	426	10	25.64	AT1G36160.1, AT1G36180.1, AT1G59900.1, AT1G62940.1, AT2G38040.1, AT3G13930.1, AT3G16950.1, AT3G25860.1, AT4G32180.1, AT5G36880.1	GO:0034030
438	⊕	GO:BP	GO:0033866	nucleoside bisphosphate biosynthetic process	5.23e-08	7.28	39	426	10	25.64	AT1G36160.1, AT1G36180.1, AT1G59900.1, AT1G62940.1, AT2G38040.1, AT3G13930.1, AT3G16950.1, AT3G25860.1, AT4G32180.1, AT5G36880.1	GO:0033866
145	⊕	GO:CC	GO:0042651	thylakoid membrane	9.35e-08	7.03	444	453	31	6.98	AT1G06430.1, AT1G06680.1, AT1G16720.1, AT1G52410.1, AT1G55480.1, AT1G65260.1, AT1G67700.1, AT1G73110.1, AT2G20260.1, AT2G22360.1, AT2G25080.1, AT2G35490.1, AT2G36250.1, AT2G44920.2, AT2G45770.1, AT2G46820.1, AT2G47940.1, AT3G15520.1, AT3G46780.1, AT3G52150.1, AT3G52300.1, AT3G55330.1, AT3G63160.1, AT4G04020.1, AT4G21280.1, AT4G27440.1, AT5G04740.1, AT5G11450.1, AT5G27390.1, AT5G38660.1, AT5G45390…	GO:0042651
150	⊕	GO:CC	GO:0034357	photosynthetic membrane	9.59e-08	7.02	445	453	31	6.97	AT1G06430.1, AT1G06680.1, AT1G16720.1, AT1G52410.1, AT1G55480.1, AT1G65260.1, AT1G67700.1, AT1G73110.1, AT2G20260.1, AT2G22360.1, AT2G25080.1, AT2G35490.1, AT2G36250.1, AT2G44920.2, AT2G45770.1, AT2G46820.1, AT2G47940.1, AT3G15520.1, AT3G46780.1, AT3G52150.1, AT3G52300.1, AT3G55330.1, AT3G63160.1, AT4G04020.1, AT4G21280.1, AT4G27440.1, AT5G04740.1, AT5G11450.1, AT5G27390.1, AT5G38660.1, AT5G45390…	GO:0034357
63	⊕	GO:BP	GO:1901565	organonitrogen compound catabolic process	1.12e-07	6.95	853	426	43	5.04	AT1G02560.1, AT1G06430.1, AT1G08450.1, AT1G09100.1, AT1G09130.1, AT1G20200.1, AT1G23410.1, AT1G29150.1, AT1G44542.1, AT1G45000.1, AT1G47250.1, AT1G49970.1, AT1G50670.1, AT1G51710.1, AT1G53780.1, AT1G64520.1, AT1G65650.1, AT1G66670.1, AT1G70580.1, AT1G72330.1, AT1G75950.1, AT1G75990.1, AT2G20140.1, AT2G20860.1, AT2G47940.1, AT3G10050.1, AT3G11270.1, AT3G17810.1, AT3G22630.1, AT3G61440.1, AT4G08900…	GO:1901565
303	⊕	GO:MF	GO:0051287	NAD binding	1.15e-07	6.94	81	441	13	16.05	AT1G15710.1, AT1G18270.1, AT1G26570.1, AT2G13560.1, AT2G47650.2, AT3G04120.1, AT3G09810.1, AT3G15290.1, AT3G29360.1, AT5G03290.1, AT5G08530.1, AT5G28840.1, AT5G39320.1	GO:0051287
158	⊕	GO:CC	GO:0009535	chloroplast thylakoid membrane	1.21e-07	6.92	425	453	30	7.06	AT1G06430.1, AT1G06680.1, AT1G16720.1, AT1G52410.1, AT1G55480.1, AT1G65260.1, AT1G67700.1, AT1G73110.1, AT2G20260.1, AT2G22360.1, AT2G25080.1, AT2G35490.1, AT2G36250.1, AT2G44920.2, AT2G45770.1, AT2G46820.1, AT2G47940.1, AT3G15520.1, AT3G46780.1, AT3G52150.1, AT3G52300.1, AT3G55330.1, AT3G63160.1, AT4G04020.1, AT4G21280.1, AT4G27440.1, AT5G04740.1, AT5G11450.1, AT5G38660.1, AT5G45390.1	GO:0009535
148	⊕	GO:CC	GO:0055035	plastid thylakoid membrane	1.31e-07	6.88	427	453	30	7.03	AT1G06430.1, AT1G06680.1, AT1G16720.1, AT1G52410.1, AT1G55480.1, AT1G65260.1, AT1G67700.1, AT1G73110.1, AT2G20260.1, AT2G22360.1, AT2G25080.1, AT2G35490.1, AT2G36250.1, AT2G44920.2, AT2G45770.1, AT2G46820.1, AT2G47940.1, AT3G15520.1, AT3G46780.1, AT3G52150.1, AT3G52300.1, AT3G55330.1, AT3G63160.1, AT4G04020.1, AT4G21280.1, AT4G27440.1, AT5G04740.1, AT5G11450.1, AT5G38660.1, AT5G45390.1	GO:0055035
6	⊕	GO:BP	GO:0071840	cellular component organization or biogenesis	1.43e-07	6.85	3364	426	108	3.21	AT1G01200.1, AT1G04170.1, AT1G05180.1, AT1G06400.1, AT1G08730.1, AT1G09340.1, AT1G10200.1, AT1G15470.1, AT1G16720.1, AT1G18450.1, AT1G26910.2, AT1G30230.1, AT1G32500.1, AT1G45000.1, AT1G48630.1, AT1G48830.1, AT1G49970.1, AT1G52400.1, AT1G55480.1, AT1G62940.1, AT1G64520.1, AT1G65260.1, AT1G69940.1, AT1G75780.1, AT1G75950.1, AT2G01690.1, AT2G21170.1, AT2G22125.1, AT2G27040.1, AT2G31170.1, AT2G33150…	GO:0071840
311	⊕	GO:BP	GO:0009123	nucleoside monophosphate metabolic process	1.69e-07	6.77	70	426	12	17.14	AT1G16350.1, AT1G29900.1, AT1G36280.1, AT1G55810.1, AT1G63660.1, AT1G74260.1, AT1G79470.1, AT3G09820.1, AT3G53900.1, AT4G12440.1, AT4G26510.1, AT5G40870.1	GO:0009123
453	⊕	GO:CC	GO:0042788	polysomal ribosome	1.95e-07	6.71	98	453	14	14.29	AT1G48630.1, AT1G48830.1, AT2G36160.1, AT3G09630.1, AT3G24830.1, AT3G46040.1, AT3G49910.1, AT3G52300.1, AT4G11150.1, AT4G31700.2, AT4G34670.1, AT5G09510.1, AT5G16130.1, AT5G41520.1	GO:0042788
77	⊕	GO:BP	GO:1901576	organic substance biosynthetic process	3.96e-07	6.4	7747	426	200	2.58	AT1G03475.1, AT1G04170.1, AT1G04480.1, AT1G06410.1, AT1G07370.1, AT1G07890.1, AT1G08450.1, AT1G08520.1, AT1G09100.1, AT1G09340.1, AT1G09795.1, AT1G11650.1, AT1G11720.1, AT1G15470.1, AT1G15710.1, AT1G16350.1, AT1G16720.1, AT1G18450.1, AT1G18500.1, AT1G22410.1, AT1G22780.1, AT1G22940.1, AT1G23410.1, AT1G26570.1, AT1G26910.2, AT1G27400.1, AT1G29900.1, AT1G30230.1, AT1G32200.1, AT1G32220.1, AT1G36160…	GO:1901576
625	⊕	GO:CC	GO:0045239	tricarboxylic acid cycle enzyme complex	4.36e-07	6.36	18	453	7	38.89	AT3G16950.1, AT3G55410.1, AT4G16155.1, AT4G26910.1, AT5G08300.1, AT5G23250.2, AT5G55070.1	GO:0045239
533	⊕	GO:BP	GO:0061615	glycolytic process through fructose-6-phosphate	4.68e-07	6.33	11	426	6	54.55	AT1G76550.1, AT2G22480.1, AT4G26270.1, AT4G29220.1, AT4G32840.1, AT5G61580.1	GO:0061615
385	⊕	KEGG	map00010	Glycolysis / Gluconeogenesis	4.77e-07	6.32	119	265	23	19.33	AT1G23800.1, AT1G32440.1, AT1G59900.1, AT1G76550.1, AT2G21170.1, AT2G22480.1, AT3G04120.1, AT3G13930.1, AT3G16950.1, AT3G25860.1, AT3G52990.1, AT3G54050.1, AT4G16155.1, AT4G26270.1, AT4G29220.1, AT4G32840.1, AT4G33070.1, AT4G38970.2, AT5G36880.1, AT5G52920.1, AT5G56350.1, AT5G61580.1, AT5G63680.1	map00010
7	⊕	GO:MF	GO:0017111	ribonucleoside triphosphate phosphatase activity	5.06e-07	6.3	694	441	37	5.33	AT1G01200.1, AT1G04170.1, AT1G06400.1, AT1G06430.1, AT1G09100.1, AT1G10290.1, AT1G45000.1, AT1G53780.1, AT1G72730.1, AT1G73110.1, AT1G75780.1, AT2G20140.1, AT2G34560.1, AT2G36250.1, AT2G42520.1, AT2G45770.1, AT2G45810.1, AT3G12915.1, AT3G53110.1, AT3G61240.1, AT4G13350.1, AT4G18330.1, AT4G18480.1, AT4G19210.1, AT4G20890.1, AT4G33650.1, AT4G39520.1, AT5G03340.1, AT5G11170.1, AT5G13650.1, AT5G16070…	GO:0017111
532	⊕	GO:MF	GO:0003872	6-phosphofructokinase activity	5.06e-07	6.3	11	441	6	54.55	AT1G76550.1, AT2G22480.1, AT4G26270.1, AT4G29220.1, AT4G32840.1, AT5G61580.1	GO:0003872
173	⊕	GO:BP	GO:0015979	photosynthesis	5.1e-07	6.29	282	426	22	7.8	AT1G06680.1, AT1G08520.1, AT1G16720.1, AT1G55480.1, AT1G76550.1, AT2G20260.1, AT2G21170.1, AT2G46820.1, AT2G47940.1, AT3G02780.1, AT3G14940.1, AT3G54050.1, AT3G55330.1, AT4G04020.1, AT4G18480.1, AT4G21280.1, AT4G27440.1, AT5G11450.1, AT5G13630.1, AT5G27390.1, AT5G45930.1, AT5G54190.1	GO:0015979
20	⊕	GO:BP	GO:0044085	cellular component biogenesis	7.27e-07	6.14	1479	426	59	3.99	AT1G01200.1, AT1G04170.1, AT1G06400.1, AT1G09340.1, AT1G10200.1, AT1G15470.1, AT1G16720.1, AT1G26910.2, AT1G30230.1, AT1G32500.1, AT1G45000.1, AT1G48630.1, AT1G48830.1, AT1G49970.1, AT1G52400.1, AT1G55480.1, AT1G62940.1, AT1G64520.1, AT2G22125.1, AT2G36160.1, AT2G43800.1, AT2G45810.1, AT2G46290.1, AT2G46820.1, AT3G08900.1, AT3G11270.1, AT3G24430.1, AT3G49910.1, AT3G51800.1, AT3G52150.1, AT3G57410…	GO:0044085
291	⊕	GO:BP	GO:0006740	NADPH regeneration	7.93e-07	6.1	28	426	8	28.57	AT1G12230.1, AT1G24280.1, AT1G64190.1, AT3G20790.1, AT5G13110.1, AT5G24420.1, AT5G35790.1, AT5G41670.1	GO:0006740
481	⊕	GO:BP	GO:0043173	nucleotide salvage	7.93e-07	6.1	19	426	7	36.84	AT1G55810.1, AT2G23420.1, AT3G09820.1, AT3G53900.1, AT4G12440.1, AT4G26510.1, AT5G40870.1	GO:0043173
226	⊕	GO:CC	GO:1905368	peptidase complex	9.3e-07	6.03	111	453	14	12.61	AT1G09100.1, AT1G20200.1, AT1G29150.1, AT1G45000.1, AT1G47250.1, AT1G53780.1, AT1G64520.1, AT1G75990.1, AT2G20140.1, AT3G11270.1, AT3G22630.1, AT5G09900.1, AT5G23540.1, AT5G64760.1	GO:1905368
534	⊕	GO:MF	GO:0008443	phosphofructokinase activity	9.56e-07	6.02	12	441	6	50	AT1G76550.1, AT2G22480.1, AT4G26270.1, AT4G29220.1, AT4G32840.1, AT5G61580.1	GO:0008443
28	⊕	GO:MF	GO:0005525	GTP binding	9.99e-07	6	289	441	22	7.61	AT1G01200.1, AT1G04170.1, AT1G06400.1, AT1G10290.1, AT1G55810.1, AT1G75780.1, AT2G36250.1, AT2G39770.1, AT2G45770.1, AT3G12915.1, AT3G53900.1, AT4G13350.1, AT4G14960.1, AT4G18330.1, AT4G20890.1, AT4G26510.1, AT4G33650.1, AT4G39520.1, AT5G13650.1, AT5G40870.1, AT5G44340.1, AT5G62690.1	GO:0005525
162	⊕	GO:CC	GO:1990204	oxidoreductase complex	9.96e-07	6	148	453	16	10.81	AT1G06680.1, AT2G18450.1, AT2G27730.1, AT3G13930.1, AT3G16950.1, AT3G25860.1, AT3G55330.1, AT3G55410.1, AT4G16155.1, AT4G21280.1, AT4G26910.1, AT5G08530.1, AT5G11450.1, AT5G27390.1, AT5G55070.1, AT5G66760.1	GO:1990204
452	⊕	GO:CC	GO:0005844	polysome	9.96e-07	6	112	453	14	12.5	AT1G48630.1, AT1G48830.1, AT2G36160.1, AT3G09630.1, AT3G24830.1, AT3G46040.1, AT3G49910.1, AT3G52300.1, AT4G11150.1, AT4G31700.2, AT4G34670.1, AT5G09510.1, AT5G16130.1, AT5G41520.1	GO:0005844
297	⊕	GO:BP	GO:0072524	pyridine-containing compound metabolic process	1.06e-06	5.97	67	426	11	16.42	AT1G12230.1, AT1G24280.1, AT1G64190.1, AT2G23420.1, AT2G38230.1, AT3G20790.1, AT5G13110.1, AT5G24420.1, AT5G35790.1, AT5G41670.1, AT5G58330.1	GO:0072524
289	⊕	GO:BP	GO:0046496	nicotinamide nucleotide metabolic process	1.31e-06	5.88	54	426	10	18.52	AT1G12230.1, AT1G24280.1, AT1G64190.1, AT2G23420.1, AT3G20790.1, AT5G13110.1, AT5G24420.1, AT5G35790.1, AT5G41670.1, AT5G58330.1	GO:0046496
489	⊕	KEGG	map00020	Citrate cycle (TCA cycle)	1.37e-06	5.86	64	265	16	25	AT1G59900.1, AT2G18450.1, AT2G44350.1, AT3G09810.1, AT3G13930.1, AT3G16950.1, AT3G25860.1, AT3G55410.1, AT4G16155.1, AT4G26910.1, AT5G03290.1, AT5G08300.1, AT5G09660.3, AT5G23250.2, AT5G55070.1, AT5G66760.1	map00020
209	⊕	GO:CC	GO:0010007	magnesium chelatase complex	1.61e-06	5.79	4	453	4	100	AT1G08520.1, AT4G18480.1, AT5G13630.1, AT5G45930.1	GO:0010007
125	⊕	GO:CC	GO:0044391	ribosomal subunit	1.74e-06	5.76	331	453	24	7.25	AT1G04480.1, AT1G22780.1, AT1G23410.1, AT1G26910.2, AT1G27400.1, AT1G48830.1, AT2G36160.1, AT3G09630.1, AT3G13120.1, AT3G24830.1, AT3G25920.1, AT3G46040.1, AT3G49910.1, AT3G56340.1, AT4G01310.1, AT4G31700.2, AT4G34670.1, AT5G09510.1, AT5G13510.1, AT5G14320.1, AT5G16130.1, AT5G41520.1, ATCG00380.1, ATCG00790.1	GO:0044391
626	⊕	GO:CC	GO:0045252	oxoglutarate dehydrogenase complex	1.74e-06	5.76	8	453	5	62.5	AT3G16950.1, AT3G55410.1, AT4G16155.1, AT4G26910.1, AT5G55070.1	GO:0045252
492	⊕	GO:BP	GO:0006084	acetyl-CoA metabolic process	1.82e-06	5.74	31	426	8	25.81	AT1G59900.1, AT3G13930.1, AT3G16950.1, AT3G25860.1, AT4G11820.1, AT4G26910.1, AT5G36880.1, AT5G55070.1	GO:0006084
293	⊕	GO:BP	GO:0019362	pyridine nucleotide metabolic process	1.84e-06	5.73	56	426	10	17.86	AT1G12230.1, AT1G24280.1, AT1G64190.1, AT2G23420.1, AT3G20790.1, AT5G13110.1, AT5G24420.1, AT5G35790.1, AT5G41670.1, AT5G58330.1	GO:0019362
295	⊕	KEGG	map00030	Pentose phosphate pathway	1.87e-06	5.73	58	265	15	25.86	AT1G12230.1, AT1G24280.1, AT1G64190.1, AT1G76550.1, AT2G22480.1, AT3G54050.1, AT4G26270.1, AT4G29220.1, AT4G32840.1, AT4G38970.2, AT5G13110.1, AT5G24420.1, AT5G35790.1, AT5G41670.1, AT5G61580.1	map00030
113	⊕	GO:BP	GO:0016043	cellular component organization	2.45e-06	5.61	2994	426	95	3.17	AT1G04170.1, AT1G05180.1, AT1G08730.1, AT1G09340.1, AT1G10200.1, AT1G15470.1, AT1G16720.1, AT1G18450.1, AT1G26910.2, AT1G30230.1, AT1G32500.1, AT1G45000.1, AT1G49970.1, AT1G52400.1, AT1G55480.1, AT1G62940.1, AT1G64520.1, AT1G65260.1, AT1G69940.1, AT1G75780.1, AT1G75950.1, AT2G01690.1, AT2G21170.1, AT2G22125.1, AT2G27040.1, AT2G31170.1, AT2G33150.1, AT2G33470.1, AT2G36160.1, AT2G36250.1, AT2G43050…	GO:0016043
89	⊕	GO:BP	GO:0044249	cellular biosynthetic process	2.52e-06	5.6	7629	426	194	2.54	AT1G03475.1, AT1G04170.1, AT1G04480.1, AT1G07370.1, AT1G07890.1, AT1G08450.1, AT1G08520.1, AT1G09100.1, AT1G09340.1, AT1G09795.1, AT1G11650.1, AT1G11720.1, AT1G15470.1, AT1G15710.1, AT1G16350.1, AT1G16720.1, AT1G18450.1, AT1G18500.1, AT1G22410.1, AT1G22780.1, AT1G22940.1, AT1G23410.1, AT1G26570.1, AT1G26910.2, AT1G27400.1, AT1G29900.1, AT1G30230.1, AT1G32200.1, AT1G32220.1, AT1G36160.1, AT1G36180…	GO:0044249
387	⊕	GO:BP	GO:0009051	pentose-phosphate shunt, oxidative branch	2.52e-06	5.6	14	426	6	42.86	AT1G24280.1, AT1G64190.1, AT5G13110.1, AT5G24420.1, AT5G35790.1, AT5G41670.1	GO:0009051
19	⊕	GO:MF	GO:0032561	guanyl ribonucleotide binding	3.03e-06	5.52	309	441	22	7.12	AT1G01200.1, AT1G04170.1, AT1G06400.1, AT1G10290.1, AT1G55810.1, AT1G75780.1, AT2G36250.1, AT2G39770.1, AT2G45770.1, AT3G12915.1, AT3G53900.1, AT4G13350.1, AT4G14960.1, AT4G18330.1, AT4G20890.1, AT4G26510.1, AT4G33650.1, AT4G39520.1, AT5G13650.1, AT5G40870.1, AT5G44340.1, AT5G62690.1	GO:0032561
38	⊕	GO:MF	GO:0019001	guanyl nucleotide binding	3.03e-06	5.52	309	441	22	7.12	AT1G01200.1, AT1G04170.1, AT1G06400.1, AT1G10290.1, AT1G55810.1, AT1G75780.1, AT2G36250.1, AT2G39770.1, AT2G45770.1, AT3G12915.1, AT3G53900.1, AT4G13350.1, AT4G14960.1, AT4G18330.1, AT4G20890.1, AT4G26510.1, AT4G33650.1, AT4G39520.1, AT5G13650.1, AT5G40870.1, AT5G44340.1, AT5G62690.1	GO:0019001
556	⊕	GO:BP	GO:0009060	aerobic respiration	3.21e-06	5.49	129	426	14	10.85	AT2G18450.1, AT2G44350.1, AT3G09810.1, AT3G14940.1, AT3G55410.1, AT4G26910.1, AT5G03290.1, AT5G08300.1, AT5G08530.1, AT5G09660.3, AT5G23250.2, AT5G55070.1, AT5G58330.1, AT5G66760.1	GO:0009060
568	⊕	GO:BP	GO:0006002	fructose 6-phosphate metabolic process	4.02e-06	5.4	15	426	6	40	AT2G22480.1, AT3G54050.1, AT4G26270.1, AT4G29220.1, AT4G32840.1, AT5G61580.1	GO:0006002
30	⊕	GO:MF	GO:0016462	pyrophosphatase activity	4.57e-06	5.34	765	441	37	4.84	AT1G01200.1, AT1G04170.1, AT1G06400.1, AT1G06430.1, AT1G09100.1, AT1G10290.1, AT1G45000.1, AT1G53780.1, AT1G72730.1, AT1G73110.1, AT1G75780.1, AT2G20140.1, AT2G34560.1, AT2G36250.1, AT2G42520.1, AT2G45770.1, AT2G45810.1, AT3G12915.1, AT3G53110.1, AT3G61240.1, AT4G13350.1, AT4G18330.1, AT4G18480.1, AT4G19210.1, AT4G20890.1, AT4G33650.1, AT4G39520.1, AT5G03340.1, AT5G11170.1, AT5G13650.1, AT5G16070…	GO:0016462
126	⊕	GO:MF	GO:0003729	mRNA binding	4.55e-06	5.34	1845	441	67	3.63	AT1G04480.1, AT1G06680.1, AT1G09340.1, AT1G10200.1, AT1G11650.1, AT1G16720.1, AT1G22780.1, AT1G23410.1, AT1G27400.1, AT1G29030.1, AT1G48410.1, AT1G48830.1, AT1G49600.1, AT1G67700.1, AT1G70580.1, AT1G72730.1, AT1G75780.1, AT1G76180.1, AT2G04520.1, AT2G36160.1, AT2G42520.1, AT2G45810.1, AT3G09630.1, AT3G13120.1, AT3G24830.1, AT3G25920.1, AT3G44300.1, AT3G49910.1, AT3G51800.1, AT3G52140.1, AT3G52150…	GO:0003729
352	⊕	GO:MF	GO:0050661	NADP binding	4.57e-06	5.34	77	441	11	14.29	AT1G18270.1, AT1G24280.1, AT1G64190.1, AT2G44040.1, AT3G04120.1, AT3G17810.1, AT4G19710.2, AT5G13110.1, AT5G35790.1, AT5G41670.1, AT5G62790.1	GO:0050661
365	⊕	GO:MF	GO:0050897	cobalt ion binding	4.55e-06	5.34	47	441	9	19.15	AT1G20630.1, AT2G13560.1, AT3G55410.1, AT4G08870.1, AT4G08900.1, AT4G34030.1, AT5G10860.1, AT5G63620.1, AT5G66760.1	GO:0050897
27	⊕	GO:MF	GO:0016818	hydrolase activity, acting on acid anhydrides, in phosphorus-containing anhydrides	5.57e-06	5.25	773	441	37	4.79	AT1G01200.1, AT1G04170.1, AT1G06400.1, AT1G06430.1, AT1G09100.1, AT1G10290.1, AT1G45000.1, AT1G53780.1, AT1G72730.1, AT1G73110.1, AT1G75780.1, AT2G20140.1, AT2G34560.1, AT2G36250.1, AT2G42520.1, AT2G45770.1, AT2G45810.1, AT3G12915.1, AT3G53110.1, AT3G61240.1, AT4G13350.1, AT4G18330.1, AT4G18480.1, AT4G19210.1, AT4G20890.1, AT4G33650.1, AT4G39520.1, AT5G03340.1, AT5G11170.1, AT5G13650.1, AT5G16070…	GO:0016818
155	⊕	GO:MF	GO:0043169	cation binding	5.57e-06	5.25	3910	441	116	2.97	AT1G06430.1, AT1G06640.1, AT1G06680.1, AT1G07890.1, AT1G08450.1, AT1G09795.1, AT1G10200.1, AT1G11840.1, AT1G12230.1, AT1G16350.1, AT1G18270.1, AT1G18500.1, AT1G20630.1, AT1G22940.1, AT1G23410.1, AT1G23740.1, AT1G29900.1, AT1G32440.1, AT1G35720.1, AT1G36160.1, AT1G36180.1, AT1G48410.1, AT1G51420.1, AT1G52410.1, AT1G74040.2, AT1G74260.1, AT1G75780.1, AT1G76180.1, AT1G76550.1, AT1G79470.1, AT2G04842…	GO:0043169
102	⊕	GO:BP	GO:0043043	peptide biosynthetic process	6.12e-06	5.21	1504	426	57	3.79	AT1G04170.1, AT1G04480.1, AT1G09340.1, AT1G16720.1, AT1G22780.1, AT1G23410.1, AT1G26910.2, AT1G27400.1, AT1G30230.1, AT1G48350.1, AT1G48410.1, AT1G48630.1, AT1G48830.1, AT1G72730.1, AT2G04520.1, AT2G04842.1, AT2G27040.1, AT2G31170.1, AT2G36160.1, AT2G45810.1, AT2G46290.1, AT3G02760.1, AT3G09630.1, AT3G12915.1, AT3G13120.1, AT3G24830.1, AT3G25920.1, AT3G46040.1, AT3G49910.1, AT3G56340.1, AT3G58140…	GO:0043043
35	⊕	GO:MF	GO:0016817	hydrolase activity, acting on acid anhydrides	6.35e-06	5.2	778	441	37	4.76	AT1G01200.1, AT1G04170.1, AT1G06400.1, AT1G06430.1, AT1G09100.1, AT1G10290.1, AT1G45000.1, AT1G53780.1, AT1G72730.1, AT1G73110.1, AT1G75780.1, AT2G20140.1, AT2G34560.1, AT2G36250.1, AT2G42520.1, AT2G45770.1, AT2G45810.1, AT3G12915.1, AT3G53110.1, AT3G61240.1, AT4G13350.1, AT4G18330.1, AT4G18480.1, AT4G19210.1, AT4G20890.1, AT4G33650.1, AT4G39520.1, AT5G03340.1, AT5G11170.1, AT5G13650.1, AT5G16070…	GO:0016817
52	⊕	GO:CC	GO:0009368	endopeptidase Clp complex	7.39e-06	5.13	10	453	5	50	AT1G02560.1, AT1G09130.1, AT1G49970.1, AT1G66670.1, AT5G45390.1	GO:0009368
299	⊕	GO:BP	GO:0006098	pentose-phosphate shunt	8.06e-06	5.09	26	426	7	26.92	AT1G12230.1, AT1G24280.1, AT1G64190.1, AT5G13110.1, AT5G24420.1, AT5G35790.1, AT5G41670.1	GO:0006098
66	⊕	GO:BP	GO:0006807	nitrogen compound metabolic process	8.28e-06	5.08	10396	426	245	2.36	AT1G02560.1, AT1G03475.1, AT1G04170.1, AT1G04480.1, AT1G05180.1, AT1G06430.1, AT1G07370.1, AT1G08450.1, AT1G08520.1, AT1G09100.1, AT1G09130.1, AT1G09340.1, AT1G09795.1, AT1G11650.1, AT1G11910.1, AT1G12230.1, AT1G15470.1, AT1G15710.1, AT1G16350.1, AT1G16720.1, AT1G17720.1, AT1G18450.1, AT1G18500.1, AT1G20200.1, AT1G22410.1, AT1G22780.1, AT1G22940.1, AT1G23410.1, AT1G24280.1, AT1G25490.1, AT1G26570…	GO:0006807
153	⊕	GO:CC	GO:0031968	organelle outer membrane	1.02e-05	4.99	557	453	31	5.57	AT1G06430.1, AT1G06680.1, AT1G16720.1, AT1G52410.1, AT1G55480.1, AT1G65260.1, AT1G67700.1, AT1G73110.1, AT2G17390.1, AT2G20260.1, AT2G22360.1, AT2G25080.1, AT2G35490.1, AT2G36250.1, AT2G44920.2, AT2G45770.1, AT2G46820.1, AT2G47940.1, AT3G15520.1, AT3G46780.1, AT3G52150.1, AT3G52300.1, AT3G55330.1, AT3G63160.1, AT4G04020.1, AT4G21280.1, AT4G27440.1, AT5G04740.1, AT5G11450.1, AT5G38660.1, AT5G45390…	GO:0031968
154	⊕	GO:CC	GO:0019867	outer membrane	1.02e-05	4.99	557	453	31	5.57	AT1G06430.1, AT1G06680.1, AT1G16720.1, AT1G52410.1, AT1G55480.1, AT1G65260.1, AT1G67700.1, AT1G73110.1, AT2G17390.1, AT2G20260.1, AT2G22360.1, AT2G25080.1, AT2G35490.1, AT2G36250.1, AT2G44920.2, AT2G45770.1, AT2G46820.1, AT2G47940.1, AT3G15520.1, AT3G46780.1, AT3G52150.1, AT3G52300.1, AT3G55330.1, AT3G63160.1, AT4G04020.1, AT4G21280.1, AT4G27440.1, AT5G04740.1, AT5G11450.1, AT5G38660.1, AT5G45390…	GO:0019867
210	⊕	GO:MF	GO:0051002	ligase activity, forming nitrogen-metal bonds	1.08e-05	4.96	5	441	4	80	AT1G08520.1, AT4G18480.1, AT5G13630.1, AT5G45930.1	GO:0051002
211	⊕	GO:MF	GO:0051003	ligase activity, forming nitrogen-metal bonds, forming coordination complexes	1.08e-05	4.96	5	441	4	80	AT1G08520.1, AT4G18480.1, AT5G13630.1, AT5G45930.1	GO:0051003
212	⊕	GO:MF	GO:0016851	magnesium chelatase activity	1.08e-05	4.96	5	441	4	80	AT1G08520.1, AT4G18480.1, AT5G13630.1, AT5G45930.1	GO:0016851
288	⊕	GO:BP	GO:0006739	NADP metabolic process	1.11e-05	4.96	39	426	8	20.51	AT1G12230.1, AT1G24280.1, AT1G64190.1, AT3G20790.1, AT5G13110.1, AT5G24420.1, AT5G35790.1, AT5G41670.1	GO:0006739
372	⊕	GO:CC	GO:0015935	small ribosomal subunit	1.14e-05	4.94	138	453	14	10.14	AT1G22780.1, AT1G23410.1, AT1G48830.1, AT2G36160.1, AT3G13120.1, AT3G46040.1, AT3G56340.1, AT4G31700.2, AT4G34670.1, AT5G09510.1, AT5G14320.1, AT5G16130.1, AT5G41520.1, ATCG00380.1	GO:0015935
43	⊕	GO:MF	GO:0051117	ATPase binding	1.16e-05	4.93	18	441	6	33.33	AT1G02560.1, AT1G09130.1, AT1G34760.1, AT1G49970.1, AT1G66670.1, AT5G45390.1	GO:0051117
103	⊕	GO:BP	GO:0006518	peptide metabolic process	1.18e-05	4.93	1537	426	57	3.71	AT1G04170.1, AT1G04480.1, AT1G09340.1, AT1G16720.1, AT1G22780.1, AT1G23410.1, AT1G26910.2, AT1G27400.1, AT1G30230.1, AT1G48350.1, AT1G48410.1, AT1G48630.1, AT1G48830.1, AT1G72730.1, AT2G04520.1, AT2G04842.1, AT2G27040.1, AT2G31170.1, AT2G36160.1, AT2G45810.1, AT2G46290.1, AT3G02760.1, AT3G09630.1, AT3G12915.1, AT3G13120.1, AT3G24830.1, AT3G25920.1, AT3G46040.1, AT3G49910.1, AT3G56340.1, AT3G58140…	GO:0006518
171	⊕	GO:MF	GO:1901149	salicylic acid binding	1.17e-05	4.93	28	441	7	25	AT1G06680.1, AT1G25490.1, AT2G30860.1, AT2G31570.1, AT3G04120.1, AT3G11630.1, AT5G55070.1	GO:1901149
146	⊕	GO:MF	GO:0046872	metal ion binding	1.22e-05	4.92	3895	441	114	2.93	AT1G06430.1, AT1G06640.1, AT1G06680.1, AT1G07890.1, AT1G08450.1, AT1G09795.1, AT1G10200.1, AT1G11840.1, AT1G12230.1, AT1G16350.1, AT1G18270.1, AT1G18500.1, AT1G20630.1, AT1G22940.1, AT1G23410.1, AT1G23740.1, AT1G29900.1, AT1G32440.1, AT1G35720.1, AT1G36160.1, AT1G36180.1, AT1G48410.1, AT1G51420.1, AT1G52410.1, AT1G74040.2, AT1G74260.1, AT1G75780.1, AT1G76180.1, AT1G76550.1, AT1G79470.1, AT2G04842…	GO:0046872
338	⊕	GO:BP	GO:0009127	purine nucleoside monophosphate biosynthetic process	1.72e-05	4.76	29	426	7	24.14	AT1G16350.1, AT1G36280.1, AT1G63660.1, AT1G74260.1, AT1G79470.1, AT3G09820.1, AT4G12440.1	GO:0009127
342	⊕	GO:BP	GO:0009168	purine ribonucleoside monophosphate biosynthetic process	1.72e-05	4.76	29	426	7	24.14	AT1G16350.1, AT1G36280.1, AT1G63660.1, AT1G74260.1, AT1G79470.1, AT3G09820.1, AT4G12440.1	GO:0009168
69	⊕	GO:BP	GO:0009057	macromolecule catabolic process	1.81e-05	4.74	999	426	42	4.2	AT1G02560.1, AT1G06430.1, AT1G08450.1, AT1G09100.1, AT1G09130.1, AT1G09340.1, AT1G20200.1, AT1G23410.1, AT1G29150.1, AT1G45000.1, AT1G47250.1, AT1G49970.1, AT1G50670.1, AT1G51710.1, AT1G53780.1, AT1G64520.1, AT1G65650.1, AT1G66670.1, AT1G69940.1, AT1G75950.1, AT1G75990.1, AT1G78060.1, AT2G20140.1, AT2G39930.1, AT2G40840.1, AT2G43050.1, AT2G47940.1, AT3G01510.1, AT3G10740.1, AT3G10940.1, AT3G11270…	GO:0009057
406	⊕	GO:MF	GO:0016879	ligase activity, forming carbon-nitrogen bonds	1.84e-05	4.73	73	441	10	13.7	AT1G29900.1, AT1G36160.1, AT1G36180.1, AT1G48470.1, AT1G63660.1, AT1G74260.1, AT2G23420.1, AT3G04480.1, AT5G05980.1, AT5G27380.1	GO:0016879
229	⊕	KEGG	map03050	Proteasome	2.11e-05	4.67	61	265	14	22.95	AT1G09100.1, AT1G20200.1, AT1G29150.1, AT1G45000.1, AT1G47250.1, AT1G53780.1, AT1G64520.1, AT1G75990.1, AT2G20140.1, AT3G11270.1, AT3G22630.1, AT5G09900.1, AT5G23540.1, AT5G64760.1	map03050
283	⊕	GO:BP	GO:0044282	small molecule catabolic process	2.23e-05	4.65	248	426	18	7.26	AT1G11840.1, AT1G44542.1, AT1G64190.1, AT1G70580.1, AT1G72330.1, AT2G20860.1, AT2G21170.1, AT2G33150.1, AT2G41530.1, AT3G10050.1, AT4G08900.1, AT4G26910.1, AT4G33070.1, AT4G34030.1, AT5G09660.3, AT5G41670.1, AT5G46180.1, AT5G55070.1	GO:0044282
355	⊕	GO:MF	GO:0005200	structural constituent of cytoskeleton	2.3e-05	4.64	31	441	7	22.58	AT1G18450.1, AT1G75780.1, AT3G18780.1, AT4G14960.1, AT4G20890.1, AT5G44340.1, AT5G62690.1	GO:0005200
101	⊕	GO:BP	GO:0006412	translation	2.46e-05	4.61	1498	426	55	3.67	AT1G04170.1, AT1G04480.1, AT1G09340.1, AT1G16720.1, AT1G22780.1, AT1G23410.1, AT1G26910.2, AT1G27400.1, AT1G30230.1, AT1G48350.1, AT1G48410.1, AT1G48630.1, AT1G48830.1, AT1G72730.1, AT2G04520.1, AT2G04842.1, AT2G27040.1, AT2G31170.1, AT2G36160.1, AT2G45810.1, AT2G46290.1, AT3G02760.1, AT3G09630.1, AT3G12915.1, AT3G13120.1, AT3G24830.1, AT3G25920.1, AT3G46040.1, AT3G49910.1, AT3G56340.1, AT3G58140…	GO:0006412
554	⊕	GO:BP	GO:0045333	cellular respiration	2.48e-05	4.61	154	426	14	9.09	AT2G18450.1, AT2G44350.1, AT3G09810.1, AT3G14940.1, AT3G55410.1, AT4G26910.1, AT5G03290.1, AT5G08300.1, AT5G08530.1, AT5G09660.3, AT5G23250.2, AT5G55070.1, AT5G58330.1, AT5G66760.1	GO:0045333
475	⊕	GO:BP	GO:0043094	cellular metabolic compound salvage	2.58e-05	4.59	93	426	11	11.83	AT1G55810.1, AT1G70580.1, AT1G80380.1, AT2G23420.1, AT2G27730.1, AT3G09820.1, AT3G53900.1, AT4G12440.1, AT4G26510.1, AT5G09660.3, AT5G40870.1	GO:0043094
633	⊕	GO:MF	GO:0016774	phosphotransferase activity, carboxyl group as acceptor	2.56e-05	4.59	12	441	5	41.67	AT3G55610.1, AT3G57560.1, AT4G19710.2, AT5G13280.1, AT5G14060.1	GO:0016774
472	⊕	GO:MF	GO:0004845	uracil phosphoribosyltransferase activity	2.74e-05	4.56	6	441	4	66.67	AT1G55810.1, AT3G53900.1, AT4G26510.1, AT5G40870.1	GO:0004845
444	⊕	GO:BP	GO:0046395	carboxylic acid catabolic process	2.83e-05	4.55	179	426	15	8.38	AT1G44542.1, AT1G64190.1, AT1G70580.1, AT1G72330.1, AT2G20860.1, AT2G33150.1, AT3G10050.1, AT4G08900.1, AT4G26910.1, AT4G33070.1, AT4G34030.1, AT5G09660.3, AT5G41670.1, AT5G46180.1, AT5G55070.1	GO:0046395
445	⊕	GO:BP	GO:0016054	organic acid catabolic process	2.83e-05	4.55	179	426	15	8.38	AT1G44542.1, AT1G64190.1, AT1G70580.1, AT1G72330.1, AT2G20860.1, AT2G33150.1, AT3G10050.1, AT4G08900.1, AT4G26910.1, AT4G33070.1, AT4G34030.1, AT5G09660.3, AT5G41670.1, AT5G46180.1, AT5G55070.1	GO:0016054
399	⊕	GO:BP	GO:0006222	UMP biosynthetic process	2.97e-05	4.53	12	426	5	41.67	AT1G29900.1, AT1G55810.1, AT3G53900.1, AT4G26510.1, AT5G40870.1	GO:0006222
401	⊕	GO:BP	GO:0009174	pyrimidine ribonucleoside monophosphate biosynthetic process	2.97e-05	4.53	12	426	5	41.67	AT1G29900.1, AT1G55810.1, AT3G53900.1, AT4G26510.1, AT5G40870.1	GO:0009174
405	⊕	GO:BP	GO:0046049	UMP metabolic process	2.97e-05	4.53	12	426	5	41.67	AT1G29900.1, AT1G55810.1, AT3G53900.1, AT4G26510.1, AT5G40870.1	GO:0046049
286	⊕	GO:BP	GO:0051156	glucose 6-phosphate metabolic process	3.08e-05	4.51	32	426	7	21.88	AT1G12230.1, AT1G24280.1, AT1G64190.1, AT5G13110.1, AT5G24420.1, AT5G35790.1, AT5G41670.1	GO:0051156
314	⊕	GO:BP	GO:0009167	purine ribonucleoside monophosphate metabolic process	3.08e-05	4.51	32	426	7	21.88	AT1G16350.1, AT1G36280.1, AT1G63660.1, AT1G74260.1, AT1G79470.1, AT3G09820.1, AT4G12440.1	GO:0009167
341	⊕	GO:BP	GO:0009126	purine nucleoside monophosphate metabolic process	3.08e-05	4.51	32	426	7	21.88	AT1G16350.1, AT1G36280.1, AT1G63660.1, AT1G74260.1, AT1G79470.1, AT3G09820.1, AT4G12440.1	GO:0009126
473	⊕	GO:BP	GO:0010138	pyrimidine ribonucleotide salvage	3.08e-05	4.51	6	426	4	66.67	AT1G55810.1, AT3G53900.1, AT4G26510.1, AT5G40870.1	GO:0010138
484	⊕	GO:BP	GO:0032262	pyrimidine nucleotide salvage	3.08e-05	4.51	6	426	4	66.67	AT1G55810.1, AT3G53900.1, AT4G26510.1, AT5G40870.1	GO:0032262
486	⊕	GO:BP	GO:0044206	UMP salvage	3.08e-05	4.51	6	426	4	66.67	AT1G55810.1, AT3G53900.1, AT4G26510.1, AT5G40870.1	GO:0044206
598	⊕	GO:BP	GO:0006553	lysine metabolic process	3.08e-05	4.51	21	426	6	28.57	AT2G44040.1, AT4G19710.2, AT4G26910.1, AT5G13280.1, AT5G14060.1, AT5G55070.1	GO:0006553
623	⊕	GO:CC	GO:0045240	dihydrolipoyl dehydrogenase complex	3.31e-05	4.48	13	453	5	38.46	AT3G16950.1, AT3G55410.1, AT4G16155.1, AT4G26910.1, AT5G55070.1	GO:0045240
156	⊕	GO:CC	GO:0042170	plastid membrane	3.51e-05	4.45	683	453	34	4.98	AT1G06430.1, AT1G06680.1, AT1G16720.1, AT1G52410.1, AT1G55480.1, AT1G65260.1, AT1G67700.1, AT1G73110.1, AT2G17390.1, AT2G20260.1, AT2G22360.1, AT2G25080.1, AT2G35490.1, AT2G36250.1, AT2G38040.1, AT2G44920.2, AT2G45770.1, AT2G46820.1, AT2G47940.1, AT3G15520.1, AT3G46780.1, AT3G52150.1, AT3G52300.1, AT3G55330.1, AT3G63160.1, AT4G04020.1, AT4G21280.1, AT4G27440.1, AT5G04740.1, AT5G11450.1, AT5G13630…	GO:0042170
198	⊕	GO:CC	GO:0009505	plant-type cell wall	3.59e-05	4.45	396	453	24	6.06	AT1G07890.1, AT1G20630.1, AT1G22780.1, AT1G25490.1, AT1G35720.1, AT1G45000.1, AT1G48830.1, AT1G69940.1, AT1G72730.1, AT1G78060.1, AT2G44350.1, AT3G05910.1, AT3G09630.1, AT4G14960.1, AT4G18480.1, AT4G19410.1, AT4G34670.1, AT5G03340.1, AT5G08300.1, AT5G19820.1, AT5G41520.1, AT5G44340.1, AT5G56030.1, AT5G66760.1	GO:0009505
369	⊕	GO:BP	GO:0043648	dicarboxylic acid metabolic process	3.81e-05	4.42	98	426	11	11.22	AT1G22410.1, AT2G13560.1, AT2G44040.1, AT4G19710.2, AT4G33510.1, AT4G39980.1, AT5G09660.3, AT5G13280.1, AT5G14060.1, AT5G46180.1, AT5G58330.1	GO:0043648
443	⊕	GO:BP	GO:0009063	amino acid catabolic process	3.81e-05	4.42	98	426	11	11.22	AT1G44542.1, AT1G70580.1, AT1G72330.1, AT2G20860.1, AT3G10050.1, AT4G08900.1, AT4G26910.1, AT4G33070.1, AT4G34030.1, AT5G46180.1, AT5G55070.1	GO:0009063
163	⊕	GO:CC	GO:0098796	membrane protein complex	3.88e-05	4.41	627	453	32	5.1	AT1G06680.1, AT1G10730.1, AT1G16720.1, AT1G52360.1, AT1G55480.1, AT1G60780.1, AT2G01690.1, AT2G17790.1, AT2G18450.1, AT2G19680.1, AT2G20260.1, AT2G21390.1, AT2G27730.1, AT2G46820.1, AT3G01390.1, AT3G08560.1, AT3G11130.1, AT3G42050.1, AT3G51310.1, AT3G52300.1, AT3G55330.1, AT4G11150.1, AT4G21280.1, AT4G24550.1, AT5G03340.1, AT5G05010.1, AT5G08530.1, AT5G11450.1, AT5G11490.1, AT5G27390.1, AT5G46630…	GO:0098796
120	⊕	GO:MF	GO:0019843	rRNA binding	4.07e-05	4.39	140	441	13	9.29	AT1G04480.1, AT1G09340.1, AT1G22780.1, AT1G48350.1, AT2G36160.1, AT3G52150.1, AT4G01310.1, AT4G01560.1, AT5G13510.1, AT5G14320.1, ATCG00380.1, ATCG00770.1, ATCG00790.1	GO:0019843
412	⊕	GO:BP	GO:0009173	pyrimidine ribonucleoside monophosphate metabolic process	4.28e-05	4.37	13	426	5	38.46	AT1G29900.1, AT1G55810.1, AT3G53900.1, AT4G26510.1, AT5G40870.1	GO:0009173
525	⊕	GO:BP	GO:0006566	threonine metabolic process	4.28e-05	4.37	13	426	5	38.46	AT1G72810.1, AT3G10050.1, AT4G19710.2, AT5G13280.1, AT5G14060.1	GO:0006566
13	⊕	GO:MF	GO:0003924	GTPase activity	4.59e-05	4.34	212	441	16	7.55	AT1G01200.1, AT1G04170.1, AT1G06400.1, AT1G10290.1, AT1G75780.1, AT2G36250.1, AT2G45770.1, AT3G12915.1, AT4G13350.1, AT4G18330.1, AT4G20890.1, AT4G33650.1, AT4G39520.1, AT5G13650.1, AT5G44340.1, AT5G62690.1	GO:0003924
81	⊕	GO:BP	GO:0015995	chlorophyll biosynthetic process	4.69e-05	4.33	64	426	9	14.06	AT1G03475.1, AT1G08520.1, AT3G02780.1, AT4G18480.1, AT4G27440.1, AT5G13630.1, AT5G45930.1, AT5G54190.1, AT5G58270.1	GO:0015995
526	⊕	GO:BP	GO:0009066	aspartate family amino acid metabolic process	4.69e-05	4.33	64	426	9	14.06	AT1G72810.1, AT2G44040.1, AT3G10050.1, AT3G59970.3, AT4G19710.2, AT4G26910.1, AT5G13280.1, AT5G14060.1, AT5G55070.1	GO:0009066
250	⊕	GO:BP	GO:0005996	monosaccharide metabolic process	4.76e-05	4.32	189	426	15	7.94	AT1G09340.1, AT1G24280.1, AT1G70820.1, AT1G74910.3, AT2G21170.1, AT2G39770.1, AT2G47650.2, AT3G04120.1, AT3G10740.1, AT3G54050.1, AT4G16130.1, AT4G38970.2, AT5G13110.1, AT5G28840.1, AT5G35790.1	GO:0005996
553	⊕	GO:BP	GO:0015980	energy derivation by oxidation of organic compounds	5.32e-05	4.27	167	426	14	8.38	AT2G18450.1, AT2G44350.1, AT3G09810.1, AT3G14940.1, AT3G55410.1, AT4G26910.1, AT5G03290.1, AT5G08300.1, AT5G08530.1, AT5G09660.3, AT5G23250.2, AT5G55070.1, AT5G58330.1, AT5G66760.1	GO:0015980
414	⊕	GO:MF	GO:0030955	potassium ion binding	5.68e-05	4.25	14	441	5	35.71	AT1G32440.1, AT3G52990.1, AT5G52920.1, AT5G56350.1, AT5G63680.1	GO:0030955
418	⊕	GO:MF	GO:0004743	pyruvate kinase activity	5.68e-05	4.25	14	441	5	35.71	AT1G32440.1, AT3G52990.1, AT5G52920.1, AT5G56350.1, AT5G63680.1	GO:0004743
535	⊕	GO:MF	GO:0019200	carbohydrate kinase activity	5.85e-05	4.23	36	441	7	19.44	AT1G76550.1, AT2G22480.1, AT4G16130.1, AT4G26270.1, AT4G29220.1, AT4G32840.1, AT5G61580.1	GO:0019200
86	⊕	GO:MF	GO:0016627	oxidoreductase activity, acting on the CH-CH group of donors	7.03e-05	4.15	86	441	10	11.63	AT1G03475.1, AT1G15710.1, AT1G23740.1, AT2G18450.1, AT2G44040.1, AT3G17810.1, AT4G14210.1, AT4G27440.1, AT5G54190.1, AT5G66760.1	GO:0016627
395	⊕	GO:BP	GO:0009225	nucleotide-sugar metabolic process	7.09e-05	4.15	51	426	8	15.69	AT1G26570.1, AT2G39770.1, AT2G47650.2, AT3G08900.1, AT3G14790.1, AT3G29360.1, AT5G16510.1, AT5G39320.1	GO:0009225
371	⊕	GO:CC	GO:0022627	cytosolic small ribosomal subunit	7.51e-05	4.12	102	453	11	10.78	AT1G22780.1, AT1G23410.1, AT1G48830.1, AT2G36160.1, AT3G46040.1, AT3G56340.1, AT4G31700.2, AT4G34670.1, AT5G09510.1, AT5G16130.1, AT5G41520.1	GO:0022627
61	⊕	GO:CC	GO:0009840	chloroplastic endopeptidase Clp complex	8.32e-05	4.08	8	453	4	50	AT1G02560.1, AT1G49970.1, AT1G66670.1, AT5G45390.1	GO:0009840
359	⊕	GO:BP	GO:0006551	leucine metabolic process	8.64e-05	4.06	25	426	6	24	AT1G18500.1, AT1G74040.2, AT3G58990.1, AT4G34030.1, AT5G16290.1, AT5G23010.1	GO:0006551
370	⊕	GO:MF	GO:0003849	3-deoxy-7-phosphoheptulonate synthase activity	8.69e-05	4.06	3	441	3	100	AT1G22410.1, AT4G33510.1, AT4G39980.1	GO:0003849
266	⊕	GO:CC	GO:0030131	clathrin adaptor complex	9.56e-05	4.02	16	453	5	31.25	AT1G10730.1, AT1G60780.1, AT4G24550.1, AT5G11490.1, AT5G46630.2	GO:0030131
269	⊕	GO:CC	GO:0048475	coated membrane	0.000105	3.98	70	453	9	12.86	AT1G10730.1, AT1G52360.1, AT1G60780.1, AT2G21390.1, AT3G11130.1, AT4G24550.1, AT5G05010.1, AT5G11490.1, AT5G46630.2	GO:0048475
271	⊕	GO:CC	GO:0030117	membrane coat	0.000105	3.98	70	453	9	12.86	AT1G10730.1, AT1G52360.1, AT1G60780.1, AT2G21390.1, AT3G11130.1, AT4G24550.1, AT5G05010.1, AT5G11490.1, AT5G46630.2	GO:0030117
82	⊕	GO:BP	GO:0006779	porphyrin-containing compound biosynthetic process	0.000107	3.97	71	426	9	12.68	AT1G03475.1, AT1G08520.1, AT3G02780.1, AT4G18480.1, AT4G27440.1, AT5G13630.1, AT5G45930.1, AT5G54190.1, AT5G58270.1	GO:0006779
107	⊕	GO:BP	GO:0022607	cellular component assembly	0.000107	3.97	936	426	38	4.06	AT1G04170.1, AT1G10200.1, AT1G15470.1, AT1G16720.1, AT1G26910.2, AT1G30230.1, AT1G32500.1, AT1G45000.1, AT1G52400.1, AT1G55480.1, AT1G62940.1, AT1G64520.1, AT2G22125.1, AT2G36160.1, AT2G43800.1, AT2G45810.1, AT2G46290.1, AT2G46820.1, AT3G24430.1, AT3G57410.1, AT3G61140.1, AT3G61240.1, AT4G04770.1, AT4G08900.1, AT4G18330.1, AT4G30160.1, AT4G35420.1, AT5G09510.1, AT5G10470.1, AT5G11110.1, AT5G28500…	GO:0022607
358	⊕	GO:BP	GO:0009082	branched-chain amino acid biosynthetic process	0.000108	3.97	26	426	6	23.08	AT1G18500.1, AT1G74040.2, AT3G10050.1, AT3G58990.1, AT5G16290.1, AT5G23010.1	GO:0009082
363	⊕	GO:MF	GO:0046912	acyltransferase activity, acyl groups converted into alkyl on transfer	0.00011	3.96	16	441	5	31.25	AT1G18500.1, AT1G74040.2, AT2G44350.1, AT4G11820.1, AT5G23010.1	GO:0046912
415	⊕	GO:MF	GO:0031420	alkali metal ion binding	0.00011	3.96	16	441	5	31.25	AT1G32440.1, AT3G52990.1, AT5G52920.1, AT5G56350.1, AT5G63680.1	GO:0031420
94	⊕	GO:BP	GO:0046148	pigment biosynthetic process	0.00012	3.92	156	426	13	8.33	AT1G03475.1, AT1G08520.1, AT1G64520.1, AT3G02780.1, AT3G14790.1, AT4G14210.1, AT4G18480.1, AT4G27440.1, AT5G13630.1, AT5G45930.1, AT5G54190.1, AT5G58270.1, AT5G67030.1	GO:0046148
446	⊕	GO:BP	GO:1901606	alpha-amino acid catabolic process	0.00012	3.92	91	426	10	10.99	AT1G44542.1, AT1G70580.1, AT1G72330.1, AT2G20860.1, AT3G10050.1, AT4G08900.1, AT4G26910.1, AT4G34030.1, AT5G46180.1, AT5G55070.1	GO:1901606
410	⊕	GO:BP	GO:0009130	pyrimidine nucleoside monophosphate biosynthetic process	0.000125	3.9	16	426	5	31.25	AT1G29900.1, AT1G55810.1, AT3G53900.1, AT4G26510.1, AT5G40870.1	GO:0009130
96	⊕	GO:CC	GO:0048046	apoplast	0.000129	3.89	489	453	26	5.32	AT1G03475.1, AT1G06680.1, AT1G09310.1, AT1G09340.1, AT1G23740.1, AT1G29660.1, AT1G35720.1, AT1G53080.1, AT1G78060.1, AT2G21170.1, AT2G30860.1, AT2G41530.1, AT3G04120.1, AT3G09820.1, AT3G10740.1, AT3G11630.1, AT3G19170.1, AT3G20820.1, AT3G22630.1, AT3G54050.1, AT4G27520.1, AT4G38970.2, AT5G09660.3, AT5G58330.1, AT5G63800.1, AT5G64570.1	GO:0048046
204	⊕	GO:CC	GO:0005618	cell wall	0.000129	3.89	431	453	24	5.57	AT1G07890.1, AT1G20630.1, AT1G22780.1, AT1G25490.1, AT1G35720.1, AT1G45000.1, AT1G48830.1, AT1G69940.1, AT1G72730.1, AT1G78060.1, AT2G44350.1, AT3G05910.1, AT3G09630.1, AT4G14960.1, AT4G18480.1, AT4G19410.1, AT4G34670.1, AT5G03340.1, AT5G08300.1, AT5G19820.1, AT5G41520.1, AT5G44340.1, AT5G56030.1, AT5G66760.1	GO:0005618
265	⊕	GO:CC	GO:0030118	clathrin coat	0.000131	3.88	28	453	6	21.43	AT1G10730.1, AT1G60780.1, AT3G11130.1, AT4G24550.1, AT5G11490.1, AT5G46630.2	GO:0030118
105	⊕	GO:BP	GO:0006413	translational initiation	0.000135	3.87	113	426	11	9.73	AT1G04170.1, AT1G16720.1, AT1G22780.1, AT1G72730.1, AT2G04520.1, AT2G46290.1, AT4G18040.1, AT4G18330.1, AT4G19210.1, AT4G34110.1, AT5G57870.1	GO:0006413
79	⊕	GO:BP	GO:0033014	tetrapyrrole biosynthetic process	0.000145	3.84	74	426	9	12.16	AT1G03475.1, AT1G08520.1, AT3G02780.1, AT4G18480.1, AT4G27440.1, AT5G13630.1, AT5G45930.1, AT5G54190.1, AT5G58270.1	GO:0033014
326	⊕	GO:BP	GO:0009201	ribonucleoside triphosphate biosynthetic process	0.000154	3.81	57	426	8	14.04	AT1G16350.1, AT1G55810.1, AT1G79470.1, AT2G19680.1, AT3G01390.1, AT3G52300.1, AT4G26510.1, AT5G40870.1	GO:0009201
236	⊕	GO:CC	GO:0042579	microbody	0.000157	3.8	354	453	21	5.93	AT1G09340.1, AT1G11840.1, AT1G20630.1, AT1G52400.1, AT1G52410.1, AT1G60550.1, AT1G70580.1, AT1G74910.3, AT2G27730.1, AT2G29300.1, AT2G29310.1, AT2G30860.1, AT2G31570.1, AT2G33150.1, AT2G42520.1, AT3G15290.1, AT4G33650.1, AT5G09660.3, AT5G16290.1, AT5G35790.1, AT5G36880.1	GO:0042579
239	⊕	GO:CC	GO:0005777	peroxisome	0.000157	3.8	354	453	21	5.93	AT1G09340.1, AT1G11840.1, AT1G20630.1, AT1G52400.1, AT1G52410.1, AT1G60550.1, AT1G70580.1, AT1G74910.3, AT2G27730.1, AT2G29300.1, AT2G29310.1, AT2G30860.1, AT2G31570.1, AT2G33150.1, AT2G42520.1, AT3G15290.1, AT4G33650.1, AT5G09660.3, AT5G16290.1, AT5G35790.1, AT5G36880.1	GO:0005777
386	⊕	GO:BP	GO:0006006	glucose metabolic process	0.000171	3.77	58	426	8	13.79	AT1G24280.1, AT1G70820.1, AT2G21170.1, AT3G04120.1, AT3G54050.1, AT4G38970.2, AT5G13110.1, AT5G35790.1	GO:0006006
404	⊕	GO:BP	GO:0009129	pyrimidine nucleoside monophosphate metabolic process	0.000169	3.77	17	426	5	29.41	AT1G29900.1, AT1G55810.1, AT3G53900.1, AT4G26510.1, AT5G40870.1	GO:0009129
544	⊕	GO:BP	GO:0006418	tRNA aminoacylation for protein translation	0.000171	3.77	58	426	8	13.79	AT2G04842.1, AT2G31170.1, AT3G02760.1, AT3G58140.1, AT4G13780.1, AT4G33760.1, AT5G16715.1, AT5G64050.1	GO:0006418
428	⊕	GO:MF	GO:0016421	CoA carboxylase activity	0.000176	3.76	9	441	4	44.44	AT1G36160.1, AT1G36180.1, AT2G38040.1, AT4G34030.1	GO:0016421
431	⊕	GO:MF	GO:0016885	ligase activity, forming carbon-carbon bonds	0.000176	3.76	9	441	4	44.44	AT1G36160.1, AT1G36180.1, AT2G38040.1, AT4G34030.1	GO:0016885
634	⊕	GO:MF	GO:0019202	amino acid kinase activity	0.000176	3.76	9	441	4	44.44	AT3G55610.1, AT4G19710.2, AT5G13280.1, AT5G14060.1	GO:0019202
545	⊕	GO:MF	GO:0004812	aminoacyl-tRNA ligase activity	0.000194	3.71	60	441	8	13.33	AT2G04842.1, AT2G31170.1, AT3G02760.1, AT3G58140.1, AT4G13780.1, AT4G33760.1, AT5G16715.1, AT5G64050.1	GO:0004812
548	⊕	GO:MF	GO:0016875	ligase activity, forming carbon-oxygen bonds	0.000194	3.71	60	441	8	13.33	AT2G04842.1, AT2G31170.1, AT3G02760.1, AT3G58140.1, AT4G13780.1, AT4G33760.1, AT5G16715.1, AT5G64050.1	GO:0016875
122	⊕	GO:CC	GO:1990904	ribonucleoprotein complex	0.000198	3.7	980	453	41	4.18	AT1G04480.1, AT1G22780.1, AT1G23410.1, AT1G26910.2, AT1G27400.1, AT1G48350.1, AT1G48410.1, AT1G48630.1, AT1G48830.1, AT2G27040.1, AT2G36160.1, AT2G46290.1, AT3G09630.1, AT3G12915.1, AT3G13120.1, AT3G24830.1, AT3G25920.1, AT3G46040.1, AT3G49910.1, AT3G51800.1, AT3G52150.1, AT3G52300.1, AT3G56340.1, AT4G01310.1, AT4G01560.1, AT4G11150.1, AT4G14510.1, AT4G25630.1, AT4G31700.2, AT4G34110.1, AT4G34670…	GO:1990904
37	⊕	GO:MF	GO:0016787	hydrolase activity	0.000215	3.67	3310	441	95	2.87	AT1G01200.1, AT1G02560.1, AT1G04170.1, AT1G06400.1, AT1G06430.1, AT1G09100.1, AT1G09130.1, AT1G10290.1, AT1G11910.1, AT1G29660.1, AT1G35420.1, AT1G44542.1, AT1G45000.1, AT1G48410.1, AT1G49970.1, AT1G50670.1, AT1G51420.1, AT1G51710.1, AT1G52400.1, AT1G53780.1, AT1G65650.1, AT1G66670.1, AT1G69940.1, AT1G72730.1, AT1G73110.1, AT1G75780.1, AT1G78060.1, AT1G80380.1, AT2G17280.1, AT2G20140.1, AT2G21620…	GO:0016787
56	⊕	GO:BP	GO:0030163	protein catabolic process	0.000241	3.62	618	426	28	4.53	AT1G02560.1, AT1G06430.1, AT1G08450.1, AT1G09100.1, AT1G09130.1, AT1G20200.1, AT1G23410.1, AT1G29150.1, AT1G45000.1, AT1G47250.1, AT1G49970.1, AT1G50670.1, AT1G51710.1, AT1G53780.1, AT1G64520.1, AT1G65650.1, AT1G66670.1, AT1G75950.1, AT1G75990.1, AT2G20140.1, AT2G47940.1, AT3G11270.1, AT3G22630.1, AT4G11260.1, AT5G03340.1, AT5G23540.1, AT5G45390.1, AT5G64760.1	GO:0030163
251	⊕	GO:MF	GO:0000287	magnesium ion binding	0.000242	3.62	145	441	12	8.28	AT1G09795.1, AT1G32440.1, AT1G51420.1, AT3G09810.1, AT3G52990.1, AT4G08900.1, AT4G33070.1, AT5G03290.1, AT5G27380.1, AT5G52920.1, AT5G56350.1, AT5G63680.1	GO:0000287
344	⊕	GO:BP	GO:0009142	nucleoside triphosphate biosynthetic process	0.000245	3.61	61	426	8	13.11	AT1G16350.1, AT1G55810.1, AT1G79470.1, AT2G19680.1, AT3G01390.1, AT3G52300.1, AT4G26510.1, AT5G40870.1	GO:0009142
546	⊕	GO:BP	GO:0043039	tRNA aminoacylation	0.000245	3.61	61	426	8	13.11	AT2G04842.1, AT2G31170.1, AT3G02760.1, AT3G58140.1, AT4G13780.1, AT4G33760.1, AT5G16715.1, AT5G64050.1	GO:0043039
476	⊕	GO:MF	GO:0019206	nucleoside kinase activity	0.000266	3.57	10	441	4	40	AT1G55810.1, AT3G09820.1, AT4G26510.1, AT5G40870.1	GO:0019206
547	⊕	GO:BP	GO:0043038	amino acid activation	0.000275	3.56	62	426	8	12.9	AT2G04842.1, AT2G31170.1, AT3G02760.1, AT3G58140.1, AT4G13780.1, AT4G33760.1, AT5G16715.1, AT5G64050.1	GO:0043038
84	⊕	GO:BP	GO:0042440	pigment metabolic process	0.000287	3.54	196	426	14	7.14	AT1G03475.1, AT1G08450.1, AT1G08520.1, AT1G64520.1, AT3G02780.1, AT3G14790.1, AT4G14210.1, AT4G18480.1, AT4G27440.1, AT5G13630.1, AT5G45930.1, AT5G54190.1, AT5G58270.1, AT5G67030.1	GO:0042440
490	⊕	GO:BP	GO:0006085	acetyl-CoA biosynthetic process	0.000291	3.54	19	426	5	26.32	AT1G59900.1, AT3G13930.1, AT3G16950.1, AT3G25860.1, AT5G36880.1	GO:0006085
329	⊕	GO:BP	GO:0009199	ribonucleoside triphosphate metabolic process	0.000303	3.52	63	426	8	12.7	AT1G16350.1, AT1G55810.1, AT1G79470.1, AT2G19680.1, AT3G01390.1, AT3G52300.1, AT4G26510.1, AT5G40870.1	GO:0009199
402	⊕	GO:BP	GO:0009064	glutamine family amino acid metabolic process	0.000316	3.5	103	426	10	9.71	AT1G29900.1, AT1G48470.1, AT1G63660.1, AT1G74260.1, AT3G55610.1, AT3G57560.1, AT4G08870.1, AT4G08900.1, AT4G30530.1, AT5G46180.1	GO:0009064
477	⊕	GO:BP	GO:0008655	pyrimidine-containing compound salvage	0.000315	3.5	10	426	4	40	AT1G55810.1, AT3G53900.1, AT4G26510.1, AT5G40870.1	GO:0008655
523	⊕	GO:BP	GO:0009088	threonine biosynthetic process	0.000315	3.5	10	426	4	40	AT1G72810.1, AT4G19710.2, AT5G13280.1, AT5G14060.1	GO:0009088
109	⊕	GO:MF	GO:0003723	RNA binding	0.000323	3.49	2776	441	82	2.95	AT1G04170.1, AT1G04480.1, AT1G06680.1, AT1G09340.1, AT1G10200.1, AT1G11650.1, AT1G15470.1, AT1G16720.1, AT1G22780.1, AT1G23410.1, AT1G27400.1, AT1G29030.1, AT1G36310.1, AT1G48350.1, AT1G48410.1, AT1G48830.1, AT1G49600.1, AT1G49970.1, AT1G67700.1, AT1G70580.1, AT1G72730.1, AT1G75780.1, AT1G76180.1, AT2G04520.1, AT2G27040.1, AT2G36160.1, AT2G42520.1, AT2G45810.1, AT2G46290.1, AT3G09630.1, AT3G13120…	GO:0003723
99	⊕	GO:BP	GO:0044271	cellular nitrogen compound biosynthetic process	0.000329	3.48	4552	426	120	2.64	AT1G03475.1, AT1G04170.1, AT1G04480.1, AT1G07370.1, AT1G08520.1, AT1G09100.1, AT1G09340.1, AT1G16350.1, AT1G16720.1, AT1G18450.1, AT1G22780.1, AT1G22940.1, AT1G23410.1, AT1G26570.1, AT1G26910.2, AT1G27400.1, AT1G29900.1, AT1G30230.1, AT1G36160.1, AT1G36180.1, AT1G36280.1, AT1G45000.1, AT1G48350.1, AT1G48410.1, AT1G48630.1, AT1G48830.1, AT1G55810.1, AT1G59900.1, AT1G62940.1, AT1G63660.1, AT1G72730…	GO:0044271
185	⊕	GO:CC	GO:0030312	external encapsulating structure	0.000331	3.48	460	453	24	5.22	AT1G07890.1, AT1G20630.1, AT1G22780.1, AT1G25490.1, AT1G35720.1, AT1G45000.1, AT1G48830.1, AT1G69940.1, AT1G72730.1, AT1G78060.1, AT2G44350.1, AT3G05910.1, AT3G09630.1, AT4G14960.1, AT4G18480.1, AT4G19410.1, AT4G34670.1, AT5G03340.1, AT5G08300.1, AT5G19820.1, AT5G41520.1, AT5G44340.1, AT5G56030.1, AT5G66760.1	GO:0030312
376	⊕	GO:BP	GO:0072528	pyrimidine-containing compound biosynthetic process	0.000333	3.48	47	426	7	14.89	AT1G22940.1, AT1G29900.1, AT1G55810.1, AT2G29630.1, AT3G53900.1, AT4G26510.1, AT5G40870.1	GO:0072528
391	⊕	GO:BP	GO:0006024	glycosaminoglycan biosynthetic process	0.000335	3.48	4	426	3	75	AT1G26570.1, AT3G29360.1, AT5G39320.1	GO:0006024
394	⊕	GO:BP	GO:0006065	UDP-glucuronate biosynthetic process	0.000335	3.48	4	426	3	75	AT1G26570.1, AT3G29360.1, AT5G39320.1	GO:0006065
397	⊕	GO:BP	GO:0006023	aminoglycan biosynthetic process	0.000335	3.48	4	426	3	75	AT1G26570.1, AT3G29360.1, AT5G39320.1	GO:0006023
380	⊕	GO:BP	GO:0072527	pyrimidine-containing compound metabolic process	0.000356	3.45	65	426	8	12.31	AT1G22940.1, AT1G29900.1, AT1G55810.1, AT2G29630.1, AT3G17810.1, AT3G53900.1, AT4G26510.1, AT5G40870.1	GO:0072527
400	⊕	GO:BP	GO:0006525	arginine metabolic process	0.000355	3.45	20	426	5	25	AT1G29900.1, AT3G57560.1, AT4G08870.1, AT4G08900.1, AT5G46180.1	GO:0006525
165	⊕	GO:MF	GO:0043177	organic acid binding	0.000378	3.42	129	441	11	8.53	AT1G06680.1, AT1G25490.1, AT2G30860.1, AT2G31570.1, AT3G04120.1, AT3G11630.1, AT3G13930.1, AT3G51240.1, AT3G57560.1, AT5G04740.1, AT5G55070.1	GO:0043177
174	⊕	GO:MF	GO:0031406	carboxylic acid binding	0.000378	3.42	129	441	11	8.53	AT1G06680.1, AT1G25490.1, AT2G30860.1, AT2G31570.1, AT3G04120.1, AT3G11630.1, AT3G13930.1, AT3G51240.1, AT3G57560.1, AT5G04740.1, AT5G55070.1	GO:0031406
175	⊕	GO:MF	GO:0033293	monocarboxylic acid binding	0.000442	3.35	68	441	8	11.76	AT1G06680.1, AT1G25490.1, AT2G30860.1, AT2G31570.1, AT3G04120.1, AT3G11630.1, AT3G13930.1, AT5G55070.1	GO:0033293
281	⊕	GO:CC	GO:0099503	secretory vesicle	0.000494	3.31	173	453	13	7.51	AT1G11840.1, AT1G11910.1, AT1G29660.1, AT1G52410.1, AT1G64190.1, AT2G22170.1, AT3G10740.1, AT3G22630.1, AT3G29360.1, AT3G60900.1, AT4G27520.1, AT4G30530.1, AT5G41670.1	GO:0099503
48	⊕	GO:BP	GO:0006515	protein quality control for misfolded or incompletely synthesized proteins	0.000532	3.27	35	426	6	17.14	AT1G02560.1, AT1G09130.1, AT1G49970.1, AT1G66670.1, AT5G03340.1, AT5G45390.1	GO:0006515
267	⊕	GO:CC	GO:0030119	AP-type membrane coat adaptor complex	0.000541	3.27	23	453	5	21.74	AT1G10730.1, AT1G60780.1, AT4G24550.1, AT5G11490.1, AT5G46630.2	GO:0030119
349	⊕	GO:CC	GO:0000159	protein phosphatase type 2A complex	0.000541	3.27	23	453	5	21.74	AT1G17720.1, AT1G25490.1, AT1G51690.1, AT3G09880.1, AT5G28850.1	GO:0000159
419	⊕	GO:BP	GO:0031163	metallo-sulfur cluster assembly	0.000532	3.27	35	426	6	17.14	AT1G32500.1, AT3G24430.1, AT4G04770.1, AT5G50960.1, AT5G61220.1, AT5G65720.1	GO:0031163
420	⊕	GO:BP	GO:0016226	iron-sulfur cluster assembly	0.000532	3.27	35	426	6	17.14	AT1G32500.1, AT3G24430.1, AT4G04770.1, AT5G50960.1, AT5G61220.1, AT5G65720.1	GO:0016226
223	⊕	GO:MF	GO:0036402	proteasome-activating activity	0.000565	3.25	12	441	4	33.33	AT1G09100.1, AT1G45000.1, AT1G53780.1, AT2G20140.1	GO:0036402
87	⊕	GO:BP	GO:0015994	chlorophyll metabolic process	0.000593	3.23	90	426	9	10	AT1G03475.1, AT1G08520.1, AT3G02780.1, AT4G18480.1, AT4G27440.1, AT5G13630.1, AT5G45930.1, AT5G54190.1, AT5G58270.1	GO:0015994
518	⊕	GO:MF	GO:0019842	vitamin binding	0.000589	3.23	136	441	11	8.09	AT1G70580.1, AT1G72330.1, AT1G72810.1, AT1G77670.1, AT3G10050.1, AT3G51240.1, AT3G55410.1, AT4G33070.1, AT5G46180.1, AT5G49810.1, AT5G65720.1	GO:0019842
59	⊕	GO:MF	GO:0004176	ATP-dependent peptidase activity	0.000625	3.2	37	441	6	16.22	AT1G02560.1, AT1G06430.1, AT1G09130.1, AT1G49970.1, AT1G66670.1, AT5G45390.1	GO:0004176
135	⊕	GO:BP	GO:0006996	organelle organization	0.000626	3.2	1459	426	49	3.36	AT1G05180.1, AT1G08730.1, AT1G09340.1, AT1G10200.1, AT1G18450.1, AT1G26910.2, AT1G32500.1, AT1G49970.1, AT1G52400.1, AT1G65260.1, AT1G75780.1, AT1G75950.1, AT2G01690.1, AT2G21170.1, AT2G22125.1, AT2G31170.1, AT2G33150.1, AT2G36160.1, AT2G36250.1, AT2G43800.1, AT2G45810.1, AT2G46820.1, AT2G47940.1, AT3G09880.1, AT3G10270.1, AT3G10690.1, AT3G18780.1, AT3G43300.1, AT3G48750.1, AT3G52140.1, AT3G57410…	GO:0006996
393	⊕	GO:MF	GO:0003979	UDP-glucose 6-dehydrogenase activity	0.000628	3.2	5	441	3	60	AT1G26570.1, AT3G29360.1, AT5G39320.1	GO:0003979
482	⊕	GO:MF	GO:0004849	uridine kinase activity	0.000628	3.2	5	441	3	60	AT1G55810.1, AT4G26510.1, AT5G40870.1	GO:0004849
161	⊕	GO:CC	GO:0009654	photosystem II oxygen evolving complex	0.000662	3.18	24	453	5	20.83	AT1G06680.1, AT3G55330.1, AT4G21280.1, AT5G11450.1, AT5G27390.1	GO:0009654
491	⊕	GO:BP	GO:0006086	acetyl-CoA biosynthetic process from pyruvate	0.000655	3.18	12	426	4	33.33	AT1G59900.1, AT3G13930.1, AT3G16950.1, AT3G25860.1	GO:0006086
357	⊕	GO:BP	GO:0009081	branched-chain amino acid metabolic process	0.000683	3.17	53	426	7	13.21	AT1G18500.1, AT1G74040.2, AT3G10050.1, AT3G58990.1, AT4G34030.1, AT5G16290.1, AT5G23010.1	GO:0009081
282	⊕	GO:MF	GO:0016829	lyase activity	0.000695	3.16	458	441	22	4.8	AT1G11840.1, AT1G18270.1, AT1G36280.1, AT1G60550.1, AT1G72810.1, AT1G72970.1, AT1G74040.2, AT2G27820.1, AT2G29630.1, AT2G38230.1, AT2G47650.2, AT3G10050.1, AT3G14790.1, AT3G14940.1, AT3G15290.1, AT3G44300.1, AT3G58990.1, AT3G61440.1, AT4G33070.1, AT4G33580.1, AT4G38970.2, AT5G61680.1	GO:0016829
333	⊕	GO:BP	GO:0006177	GMP biosynthetic process	0.000758	3.12	5	426	3	60	AT1G16350.1, AT1G63660.1, AT1G79470.1	GO:0006177
396	⊕	GO:BP	GO:0046398	UDP-glucuronate metabolic process	0.000758	3.12	5	426	3	60	AT1G26570.1, AT3G29360.1, AT5G39320.1	GO:0046398
432	⊕	GO:BP	GO:2001295	malonyl-CoA biosynthetic process	0.000758	3.12	5	426	3	60	AT1G36160.1, AT1G36180.1, AT2G38040.1	GO:2001295
483	⊕	GO:BP	GO:0044211	CTP salvage	0.000758	3.12	5	426	3	60	AT1G55810.1, AT4G26510.1, AT5G40870.1	GO:0044211
528	⊕	KEGG	map00051	Fructose and mannose metabolism	0.000763	3.12	63	265	12	19.05	AT1G74910.3, AT1G76550.1, AT2G21170.1, AT2G22480.1, AT2G39770.1, AT3G54050.1, AT4G26270.1, AT4G29220.1, AT4G32840.1, AT4G38970.2, AT5G51970.1, AT5G61580.1	map00051
335	⊕	GO:BP	GO:0009141	nucleoside triphosphate metabolic process	0.00077	3.11	73	426	8	10.96	AT1G16350.1, AT1G55810.1, AT1G79470.1, AT2G19680.1, AT3G01390.1, AT3G52300.1, AT4G26510.1, AT5G40870.1	GO:0009141
237	⊕	GO:CC	GO:0000325	plant-type vacuole	0.00082	3.09	812	453	34	4.19	AT1G09340.1, AT1G10290.1, AT1G11840.1, AT1G11910.1, AT1G22780.1, AT1G27400.1, AT1G35720.1, AT1G51420.1, AT1G52400.1, AT1G52410.1, AT1G72730.1, AT2G01690.1, AT2G27730.1, AT2G30860.1, AT2G33150.1, AT2G36160.1, AT2G47650.2, AT3G01390.1, AT3G04120.1, AT3G10740.1, AT3G11130.1, AT3G22630.1, AT3G32980.1, AT3G42050.1, AT3G49910.1, AT3G52300.1, AT4G11150.1, AT4G13940.3, AT4G20890.1, AT4G27520.1, AT4G35800…	GO:0000325
249	⊕	GO:CC	GO:0010319	stromule	0.000817	3.09	39	453	6	15.38	AT1G09340.1, AT1G23740.1, AT3G11630.1, AT3G54050.1, AT3G63160.1, AT4G04020.1	GO:0010319
246	⊕	GO:CC	GO:0005773	vacuole	0.000852	3.07	1159	453	44	3.8	AT1G09340.1, AT1G10290.1, AT1G11840.1, AT1G11910.1, AT1G22780.1, AT1G27400.1, AT1G35720.1, AT1G51420.1, AT1G52400.1, AT1G52410.1, AT1G72730.1, AT1G75780.1, AT2G01690.1, AT2G21620.1, AT2G22170.1, AT2G22360.1, AT2G24940.1, AT2G25080.1, AT2G27730.1, AT2G30860.1, AT2G33150.1, AT2G36160.1, AT2G47650.2, AT3G01390.1, AT3G04120.1, AT3G08560.1, AT3G09630.1, AT3G10740.1, AT3G11130.1, AT3G22630.1, AT3G32980…	GO:0005773
360	⊕	KEGG	map01210	2-Oxocarboxylic acid metabolism	0.000842	3.07	74	265	13	17.57	AT1G18500.1, AT1G70580.1, AT1G72330.1, AT1G74040.2, AT2G44350.1, AT3G09810.1, AT3G57560.1, AT3G58990.1, AT5G03290.1, AT5G13280.1, AT5G14060.1, AT5G16290.1, AT5G23010.1	map01210
421	⊕	GO:MF	GO:0005507	copper ion binding	0.000853	3.07	194	441	13	6.7	AT1G35720.1, AT2G27730.1, AT2G30860.1, AT3G04120.1, AT3G09820.1, AT3G13930.1, AT3G52300.1, AT3G61440.1, AT4G13940.3, AT4G22010.1, AT5G08300.1, AT5G23250.2, AT5G44070.1	GO:0005507
238	⊕	GO:BP	GO:0000272	polysaccharide catabolic process	0.000968	3.01	195	426	13	6.67	AT1G09340.1, AT1G69940.1, AT1G78060.1, AT2G39930.1, AT2G40840.1, AT2G43050.1, AT3G01510.1, AT3G10740.1, AT3G10940.1, AT3G59010.1, AT5G53370.1, AT5G61680.1, AT5G64570.1	GO:0000272
240	⊕	GO:BP	GO:0042254	ribosome biogenesis	0.000969	3.01	404	426	20	4.95	AT1G09340.1, AT1G26910.2, AT1G48630.1, AT1G48830.1, AT1G49970.1, AT2G36160.1, AT3G11270.1, AT3G49910.1, AT3G51800.1, AT3G52150.1, AT4G01560.1, AT4G14510.1, AT4G19210.1, AT4G25630.1, AT5G09510.1, AT5G13650.1, AT5G16130.1, AT5G19820.1, AT5G52820.1, ATCG00380.1	GO:0042254
106	⊕	GO:MF	GO:0000049	tRNA binding	0.00106	2.97	41	441	6	14.63	AT1G04170.1, AT1G36310.1, AT3G58140.1, AT4G13780.1, AT4G18330.1, AT5G64050.1	GO:0000049
530	⊕	GO:BP	GO:0045454	cell redox homeostasis	0.00108	2.97	40	426	6	15	AT1G76080.1, AT3G11630.1, AT3G52960.1, AT4G34120.1, AT5G06690.1, AT5G10860.1	GO:0045454
172	⊕	GO:CC	GO:0009521	photosystem	0.00111	2.95	97	453	9	9.28	AT1G06680.1, AT1G16720.1, AT1G55480.1, AT2G20260.1, AT2G46820.1, AT3G55330.1, AT4G21280.1, AT5G11450.1, AT5G27390.1	GO:0009521
389	⊕	GO:MF	GO:0004345	glucose-6-phosphate dehydrogenase activity	0.00116	2.94	6	441	3	50	AT1G24280.1, AT5G13110.1, AT5G35790.1	GO:0004345
650	⊕	GO:MF	GO:0004072	aspartate kinase activity	0.00116	2.94	6	441	3	50	AT4G19710.2, AT5G13280.1, AT5G14060.1	GO:0004072
284	⊕	GO:BP	GO:0006081	cellular aldehyde metabolic process	0.00116	2.93	58	426	7	12.07	AT1G11840.1, AT2G21170.1, AT2G38230.1, AT2G41530.1, AT5G09660.3, AT5G60600.2, AT5G62790.1	GO:0006081
390	⊕	GO:BP	GO:0009226	nucleotide-sugar biosynthetic process	0.00123	2.91	41	426	6	14.63	AT1G26570.1, AT2G39770.1, AT2G47650.2, AT3G14790.1, AT3G29360.1, AT5G39320.1	GO:0009226
22	⊕	GO:CC	GO:0031410	cytoplasmic vesicle	0.00129	2.89	834	453	34	4.08	AT1G01200.1, AT1G06400.1, AT1G09310.1, AT1G10290.1, AT1G10730.1, AT1G11840.1, AT1G11910.1, AT1G29660.1, AT1G52360.1, AT1G52410.1, AT1G60780.1, AT1G64190.1, AT2G01690.1, AT2G17790.1, AT2G21390.1, AT2G22170.1, AT2G47650.2, AT3G10740.1, AT3G11130.1, AT3G22630.1, AT3G29360.1, AT3G43300.1, AT3G51310.1, AT3G60900.1, AT4G24550.1, AT4G27520.1, AT4G30530.1, AT5G05010.1, AT5G11490.1, AT5G41670.1, AT5G41950…	GO:0031410
529	⊕	GO:BP	GO:0046364	monosaccharide biosynthetic process	0.00128	2.89	59	426	7	11.86	AT1G74910.3, AT2G21170.1, AT2G39770.1, AT3G04120.1, AT3G54050.1, AT4G38970.2, AT5G28840.1	GO:0046364
18	⊕	GO:CC	GO:0097708	intracellular vesicle	0.00131	2.88	836	453	34	4.07	AT1G01200.1, AT1G06400.1, AT1G09310.1, AT1G10290.1, AT1G10730.1, AT1G11840.1, AT1G11910.1, AT1G29660.1, AT1G52360.1, AT1G52410.1, AT1G60780.1, AT1G64190.1, AT2G01690.1, AT2G17790.1, AT2G21390.1, AT2G22170.1, AT2G47650.2, AT3G10740.1, AT3G11130.1, AT3G22630.1, AT3G29360.1, AT3G43300.1, AT3G51310.1, AT3G60900.1, AT4G24550.1, AT4G27520.1, AT4G30530.1, AT5G05010.1, AT5G11490.1, AT5G41670.1, AT5G41950…	GO:0097708
166	⊕	GO:CC	GO:0019898	extrinsic component of membrane	0.00131	2.88	79	453	8	10.13	AT1G06680.1, AT1G76180.1, AT2G01690.1, AT3G55330.1, AT4G16340.1, AT4G21280.1, AT5G11450.1, AT5G27390.1	GO:0019898
648	⊕	GO:CC	GO:0045298	tubulin complex	0.00142	2.85	7	453	3	42.86	AT4G14960.1, AT4G20890.1, AT5G44340.1	GO:0045298
454	⊕	GO:CC	GO:0010494	cytoplasmic stress granule	0.0015	2.82	29	453	5	17.24	AT1G49600.1, AT2G45810.1, AT3G53110.1, AT3G61240.1, AT4G18040.1	GO:0010494
50	⊕	GO:BP	GO:0051603	proteolysis involved in protein catabolic process	0.00154	2.81	590	426	25	4.24	AT1G02560.1, AT1G08450.1, AT1G09100.1, AT1G09130.1, AT1G20200.1, AT1G23410.1, AT1G29150.1, AT1G45000.1, AT1G47250.1, AT1G49970.1, AT1G50670.1, AT1G51710.1, AT1G53780.1, AT1G64520.1, AT1G65650.1, AT1G66670.1, AT1G75950.1, AT1G75990.1, AT2G20140.1, AT3G11270.1, AT3G22630.1, AT4G11260.1, AT5G03340.1, AT5G23540.1, AT5G45390.1	GO:0051603
85	⊕	GO:BP	GO:0006778	porphyrin-containing compound metabolic process	0.00154	2.81	103	426	9	8.74	AT1G03475.1, AT1G08520.1, AT3G02780.1, AT4G18480.1, AT4G27440.1, AT5G13630.1, AT5G45930.1, AT5G54190.1, AT5G58270.1	GO:0006778
594	⊕	GO:BP	GO:0009089	lysine biosynthetic process via diaminopimelate	0.00156	2.81	15	426	4	26.67	AT2G44040.1, AT4G19710.2, AT5G13280.1, AT5G14060.1	GO:0009089
595	⊕	GO:BP	GO:0046451	diaminopimelate metabolic process	0.00156	2.81	15	426	4	26.67	AT2G44040.1, AT4G19710.2, AT5G13280.1, AT5G14060.1	GO:0046451
93	⊕	GO:BP	GO:0033013	tetrapyrrole metabolic process	0.00163	2.79	104	426	9	8.65	AT1G03475.1, AT1G08520.1, AT3G02780.1, AT4G18480.1, AT4G27440.1, AT5G13630.1, AT5G45930.1, AT5G54190.1, AT5G58270.1	GO:0033013
117	⊕	GO:BP	GO:0022613	ribonucleoprotein complex biogenesis	0.00172	2.76	560	426	24	4.29	AT1G04170.1, AT1G09340.1, AT1G15470.1, AT1G26910.2, AT1G48630.1, AT1G48830.1, AT1G49970.1, AT2G36160.1, AT2G46290.1, AT3G11270.1, AT3G49910.1, AT3G51800.1, AT3G52150.1, AT4G01560.1, AT4G14510.1, AT4G18330.1, AT4G19210.1, AT4G25630.1, AT5G09510.1, AT5G13650.1, AT5G16130.1, AT5G19820.1, AT5G52820.1, ATCG00380.1	GO:0022613
563	⊕	GO:MF	GO:0051539	4 iron, 4 sulfur cluster binding	0.00183	2.74	64	441	7	10.94	AT2G20860.1, AT2G29630.1, AT3G24430.1, AT4G19210.1, AT5G08530.1, AT5G50960.1, AT5G60600.2	GO:0051539
233	⊕	GO:BP	GO:0034660	ncRNA metabolic process	0.00186	2.73	563	426	24	4.26	AT1G09340.1, AT1G36310.1, AT1G48830.1, AT1G49970.1, AT2G04842.1, AT2G27040.1, AT2G31170.1, AT2G36160.1, AT3G02760.1, AT3G11270.1, AT3G51800.1, AT3G52150.1, AT3G58140.1, AT4G01560.1, AT4G13780.1, AT4G14510.1, AT4G21710.1, AT4G25630.1, AT4G33760.1, AT5G13650.1, AT5G16130.1, AT5G16715.1, AT5G19820.1, AT5G64050.1	GO:0034660
437	⊕	GO:MF	GO:0003989	acetyl-CoA carboxylase activity	0.00195	2.71	7	441	3	42.86	AT1G36160.1, AT1G36180.1, AT2G38040.1	GO:0003989
361	⊕	GO:BP	GO:0009098	leucine biosynthetic process	0.00199	2.7	16	426	4	25	AT1G18500.1, AT1G74040.2, AT3G58990.1, AT5G23010.1	GO:0009098
407	⊕	GO:BP	GO:0009220	pyrimidine ribonucleotide biosynthetic process	0.00199	2.7	29	426	5	17.24	AT1G29900.1, AT1G55810.1, AT3G53900.1, AT4G26510.1, AT5G40870.1	GO:0009220
409	⊕	GO:BP	GO:0009218	pyrimidine ribonucleotide metabolic process	0.00199	2.7	29	426	5	17.24	AT1G29900.1, AT1G55810.1, AT3G53900.1, AT4G26510.1, AT5G40870.1	GO:0009218
664	⊕	GO:CC	GO:0009361	succinate-CoA ligase complex (ADP-forming)	0.00198	2.7	2	453	2	100	AT5G08300.1, AT5G23250.2	GO:0009361
392	⊕	GO:BP	GO:0030203	glycosaminoglycan metabolic process	0.00229	2.64	7	426	3	42.86	AT1G26570.1, AT3G29360.1, AT5G39320.1	GO:0030203
427	⊕	GO:BP	GO:2001293	malonyl-CoA metabolic process	0.00229	2.64	7	426	3	42.86	AT1G36160.1, AT1G36180.1, AT2G38040.1	GO:2001293
616	⊕	GO:BP	GO:0009068	aspartate family amino acid catabolic process	0.00229	2.64	7	426	3	42.86	AT3G10050.1, AT4G26910.1, AT5G55070.1	GO:0009068
461	⊕	GO:CC	GO:0030660	Golgi-associated vesicle membrane	0.00236	2.63	32	453	5	15.62	AT1G52360.1, AT1G60780.1, AT2G21390.1, AT3G11130.1, AT5G05010.1	GO:0030660
527	⊕	GO:BP	GO:0009067	aspartate family amino acid biosynthetic process	0.00244	2.61	47	426	6	12.77	AT1G72810.1, AT2G44040.1, AT3G59970.3, AT4G19710.2, AT5G13280.1, AT5G14060.1	GO:0009067
159	⊕	GO:MF	GO:0046914	transition metal ion binding	0.00257	2.59	1259	441	42	3.34	AT1G06430.1, AT1G12230.1, AT1G18270.1, AT1G20630.1, AT1G23740.1, AT1G35720.1, AT2G13560.1, AT2G22360.1, AT2G27730.1, AT2G30860.1, AT2G44350.1, AT3G04120.1, AT3G09820.1, AT3G13930.1, AT3G52300.1, AT3G55410.1, AT3G61440.1, AT3G62330.1, AT4G08870.1, AT4G08900.1, AT4G13940.3, AT4G19210.1, AT4G22010.1, AT4G26910.1, AT4G33580.1, AT4G34030.1, AT4G34230.1, AT4G37990.1, AT5G03290.1, AT5G08300.1, AT5G10860…	GO:0046914
346	⊕	GO:CC	GO:0008287	protein serine/threonine phosphatase complex	0.00267	2.57	33	453	5	15.15	AT1G17720.1, AT1G25490.1, AT1G51690.1, AT3G09880.1, AT5G28850.1	GO:0008287
347	⊕	GO:CC	GO:1903293	phosphatase complex	0.00267	2.57	33	453	5	15.15	AT1G17720.1, AT1G25490.1, AT1G51690.1, AT3G09880.1, AT5G28850.1	GO:1903293
313	⊕	GO:MF	GO:0003938	IMP dehydrogenase activity	0.00275	2.56	2	441	2	100	AT1G16350.1, AT1G79470.1	GO:0003938
500	⊕	GO:MF	GO:0008114	phosphogluconate 2-dehydrogenase activity	0.00275	2.56	2	441	2	100	AT1G64190.1, AT5G41670.1	GO:0008114
503	⊕	GO:MF	GO:0044183	protein folding chaperone	0.00275	2.56	70	441	7	10	AT1G65260.1, AT1G76180.1, AT1G79920.1, AT1G79930.1, AT4G32208.1, AT5G16070.1, AT5G56030.1	GO:0044183
508	⊕	GO:MF	GO:0070279	vitamin B6 binding	0.00275	2.56	91	441	8	8.79	AT1G70580.1, AT1G72330.1, AT1G72810.1, AT1G77670.1, AT3G10050.1, AT5G46180.1, AT5G49810.1, AT5G65720.1	GO:0070279
509	⊕	GO:MF	GO:0030170	pyridoxal phosphate binding	0.00275	2.56	91	441	8	8.79	AT1G70580.1, AT1G72330.1, AT1G72810.1, AT1G77670.1, AT3G10050.1, AT5G46180.1, AT5G49810.1, AT5G65720.1	GO:0030170
645	⊕	GO:MF	GO:0004053	arginase activity	0.00275	2.56	2	441	2	100	AT4G08870.1, AT4G08900.1	GO:0004053
646	⊕	GO:MF	GO:0008783	agmatinase activity	0.00275	2.56	2	441	2	100	AT4G08870.1, AT4G08900.1	GO:0008783
653	⊕	GO:MF	GO:0004149	dihydrolipoyllysine-residue succinyltransferase activity	0.00275	2.56	2	441	2	100	AT4G26910.1, AT5G55070.1	GO:0004149
656	⊕	GO:MF	GO:0016751	S-succinyltransferase activity	0.00275	2.56	2	441	2	100	AT4G26910.1, AT5G55070.1	GO:0016751
659	⊕	GO:MF	GO:0016748	succinyltransferase activity	0.00275	2.56	2	441	2	100	AT4G26910.1, AT5G55070.1	GO:0016748
663	⊕	GO:MF	GO:0004776	succinate-CoA ligase (GDP-forming) activity	0.00275	2.56	2	441	2	100	AT5G08300.1, AT5G23250.2	GO:0004776
149	⊕	GO:MF	GO:0016887	ATP hydrolysis activity	0.00292	2.53	481	441	21	4.37	AT1G06430.1, AT1G09100.1, AT1G45000.1, AT1G53780.1, AT1G72730.1, AT1G73110.1, AT2G20140.1, AT2G34560.1, AT2G42520.1, AT2G45810.1, AT3G53110.1, AT3G61240.1, AT4G18480.1, AT4G19210.1, AT5G03340.1, AT5G11170.1, AT5G16070.1, AT5G24020.1, AT5G45930.1, AT5G56030.1, AT5G58270.1	GO:0016887
304	⊕	GO:BP	GO:0009072	aromatic amino acid metabolic process	0.00298	2.53	90	426	8	8.89	AT1G15710.1, AT1G22410.1, AT1G44542.1, AT2G27820.1, AT4G08870.1, AT4G33070.1, AT4G33510.1, AT4G39980.1	GO:0009072
197	⊕	GO:BP	GO:0009266	response to temperature stimulus	0.00308	2.51	658	426	26	3.95	AT1G07890.1, AT1G09340.1, AT1G23740.1, AT1G35720.1, AT1G49600.1, AT1G64520.1, AT1G76080.1, AT1G76180.1, AT1G79930.1, AT2G22360.1, AT2G39770.1, AT3G04120.1, AT3G11630.1, AT3G20810.1, AT3G48750.1, AT3G52150.1, AT3G53110.1, AT3G54050.1, AT4G04020.1, AT4G11150.1, AT4G11260.1, AT4G29810.1, AT4G31120.1, AT5G13650.1, AT5G56030.1, AT5G67030.1	GO:0009266
411	⊕	GO:BP	GO:0009084	glutamine family amino acid biosynthetic process	0.00308	2.51	32	426	5	15.62	AT1G29900.1, AT1G48470.1, AT3G55610.1, AT3G57560.1, AT5G46180.1	GO:0009084
573	⊕	GO:BP	GO:0005983	starch catabolic process	0.00308	2.51	18	426	4	22.22	AT2G39930.1, AT2G40840.1, AT3G01510.1, AT3G10940.1	GO:0005983
599	⊕	GO:BP	GO:0009085	lysine biosynthetic process	0.00308	2.51	18	426	4	22.22	AT2G44040.1, AT4G19710.2, AT5G13280.1, AT5G14060.1	GO:0009085
112	⊕	GO:MF	GO:0008135	translation factor activity, RNA binding	0.00314	2.5	170	441	11	6.47	AT1G04170.1, AT1G30230.1, AT1G72730.1, AT2G04520.1, AT2G46290.1, AT3G12915.1, AT4G18040.1, AT4G18330.1, AT4G34110.1, AT5G13650.1, AT5G57870.1	GO:0008135
305	⊕	GO:MF	GO:0016628	oxidoreductase activity, acting on the CH-CH group of donors, NAD or NADP as acceptor	0.00323	2.49	52	441	6	11.54	AT1G15710.1, AT1G23740.1, AT2G44040.1, AT3G17810.1, AT4G27440.1, AT5G54190.1	GO:0016628
114	⊕	GO:MF	GO:0090079	translation regulator activity, nucleic acid binding	0.0034	2.47	172	441	11	6.4	AT1G04170.1, AT1G30230.1, AT1G72730.1, AT2G04520.1, AT2G46290.1, AT3G12915.1, AT4G18040.1, AT4G18330.1, AT4G34110.1, AT5G13650.1, AT5G57870.1	GO:0090079
324	⊕	GO:BP	GO:0046037	GMP metabolic process	0.00348	2.46	8	426	3	37.5	AT1G16350.1, AT1G63660.1, AT1G79470.1	GO:0046037
641	⊕	GO:BP	GO:0033389	putrescine biosynthetic process from arginine, using agmatinase	0.00356	2.45	2	426	2	100	AT4G08870.1, AT4G08900.1	GO:0033389
90	⊕	GO:BP	GO:0034641	cellular nitrogen compound metabolic process	0.00384	2.42	6573	426	155	2.36	AT1G03475.1, AT1G04170.1, AT1G04480.1, AT1G05180.1, AT1G07370.1, AT1G08520.1, AT1G09100.1, AT1G09340.1, AT1G11650.1, AT1G12230.1, AT1G15470.1, AT1G16350.1, AT1G16720.1, AT1G18450.1, AT1G22780.1, AT1G22940.1, AT1G23410.1, AT1G24280.1, AT1G26570.1, AT1G26910.2, AT1G27400.1, AT1G29900.1, AT1G30230.1, AT1G36160.1, AT1G36180.1, AT1G36280.1, AT1G36310.1, AT1G44542.1, AT1G45000.1, AT1G48350.1, AT1G48410…	GO:0034641
408	⊕	GO:BP	GO:0006221	pyrimidine nucleotide biosynthetic process	0.004	2.4	34	426	5	14.71	AT1G29900.1, AT1G55810.1, AT3G53900.1, AT4G26510.1, AT5G40870.1	GO:0006221
176	⊕	GO:CC	GO:0031977	thylakoid lumen	0.00428	2.37	74	453	7	9.46	AT1G06680.1, AT2G44920.2, AT3G15520.1, AT3G55330.1, AT4G04020.1, AT4G21280.1, AT5G11450.1	GO:0031977
100	⊕	GO:MF	GO:0045182	translation regulator activity	0.00433	2.36	206	441	12	5.83	AT1G04170.1, AT1G30230.1, AT1G48630.1, AT1G72730.1, AT2G04520.1, AT2G46290.1, AT3G12915.1, AT4G18040.1, AT4G18330.1, AT4G34110.1, AT5G13650.1, AT5G57870.1	GO:0045182
108	⊕	GO:MF	GO:0003743	translation initiation factor activity	0.00432	2.36	99	441	8	8.08	AT1G04170.1, AT1G72730.1, AT2G04520.1, AT2G46290.1, AT4G18040.1, AT4G18330.1, AT4G34110.1, AT5G57870.1	GO:0003743
9	⊕	GO:CC	GO:0031982	vesicle	0.00455	2.34	938	453	35	3.73	AT1G01200.1, AT1G06400.1, AT1G08730.1, AT1G09310.1, AT1G10290.1, AT1G10730.1, AT1G11840.1, AT1G11910.1, AT1G29660.1, AT1G52360.1, AT1G52410.1, AT1G60780.1, AT1G64190.1, AT2G01690.1, AT2G17790.1, AT2G21390.1, AT2G22170.1, AT2G47650.2, AT3G10740.1, AT3G11130.1, AT3G22630.1, AT3G29360.1, AT3G43300.1, AT3G51310.1, AT3G60900.1, AT4G24550.1, AT4G27520.1, AT4G30530.1, AT5G05010.1, AT5G11490.1, AT5G41670…	GO:0031982
133	⊕	GO:BP	GO:0042221	response to chemical	0.00453	2.34	3114	426	83	2.67	AT1G05180.1, AT1G06400.1, AT1G07890.1, AT1G08450.1, AT1G09100.1, AT1G09310.1, AT1G09340.1, AT1G11650.1, AT1G20630.1, AT1G22530.1, AT1G25490.1, AT1G35720.1, AT1G36160.1, AT1G45000.1, AT1G48410.1, AT1G48630.1, AT1G50670.1, AT1G52400.1, AT1G55810.1, AT1G59900.1, AT1G64520.1, AT1G74910.3, AT1G75950.1, AT1G76080.1, AT1G76180.1, AT1G76550.1, AT2G22125.1, AT2G25080.1, AT2G29630.1, AT2G30860.1, AT2G31570…	GO:0042221
218	⊕	GO:BP	GO:0007010	cytoskeleton organization	0.00453	2.34	326	426	16	4.91	AT1G08730.1, AT1G10200.1, AT1G18450.1, AT1G75780.1, AT1G75950.1, AT2G22125.1, AT2G43800.1, AT3G18780.1, AT3G57410.1, AT4G14960.1, AT4G16340.1, AT4G20890.1, AT4G30160.1, AT5G03340.1, AT5G44340.1, AT5G62690.1	GO:0007010
413	⊕	GO:BP	GO:0006220	pyrimidine nucleotide metabolic process	0.00453	2.34	35	426	5	14.29	AT1G29900.1, AT1G55810.1, AT3G53900.1, AT4G26510.1, AT5G40870.1	GO:0006220
638	⊕	GO:BP	GO:0006591	ornithine metabolic process	0.00495	2.31	9	426	3	33.33	AT3G57560.1, AT4G08870.1, AT5G46180.1	GO:0006591
231	⊕	GO:CC	GO:0140535	intracellular protein-containing complex	0.00496	2.3	733	453	29	3.96	AT1G09100.1, AT1G09340.1, AT1G18450.1, AT1G20200.1, AT1G29150.1, AT1G45000.1, AT1G47250.1, AT1G53780.1, AT1G64520.1, AT1G75950.1, AT1G75990.1, AT2G20140.1, AT2G46290.1, AT2G47960.1, AT3G11270.1, AT3G22630.1, AT4G11260.1, AT4G13780.1, AT4G18040.1, AT4G21710.1, AT4G35800.1, AT5G09900.1, AT5G14530.1, AT5G16070.1, AT5G23540.1, AT5G52820.1, AT5G54440.1, AT5G57870.1, AT5G64760.1	GO:0140535
273	⊕	GO:MF	GO:0008143	poly(A) binding	0.00503	2.3	22	441	4	18.18	AT1G11650.1, AT1G49600.1, AT4G27000.1, AT4G34110.1	GO:0008143
188	⊕	GO:BP	GO:0044248	cellular catabolic process	0.00509	2.29	758	426	28	3.69	AT1G07890.1, AT1G11840.1, AT1G20630.1, AT1G44542.1, AT1G64190.1, AT1G70580.1, AT1G72330.1, AT2G20860.1, AT2G30860.1, AT2G33150.1, AT2G41530.1, AT3G10050.1, AT3G11630.1, AT3G17810.1, AT3G32980.1, AT3G52960.1, AT3G61440.1, AT4G08900.1, AT4G26910.1, AT4G33070.1, AT4G34030.1, AT4G34110.1, AT5G03340.1, AT5G09660.3, AT5G41670.1, AT5G44070.1, AT5G46180.1, AT5G55070.1	GO:0044248
279	⊕	GO:MF	GO:2001070	starch binding	0.00509	2.29	10	441	3	30	AT1G11720.1, AT2G40840.1, AT3G10940.1	GO:2001070
571	⊕	GO:MF	GO:0004602	glutathione peroxidase activity	0.00509	2.29	10	441	3	30	AT2G25080.1, AT2G30860.1, AT2G31570.1	GO:0004602
662	⊕	GO:CC	GO:0042709	succinate-CoA ligase complex	0.00539	2.27	3	453	2	66.67	AT5G08300.1, AT5G23250.2	GO:0042709
606	⊕	GO:BP	GO:0009240	isopentenyl diphosphate biosynthetic process	0.00544	2.26	21	426	4	19.05	AT3G02780.1, AT4G11820.1, AT5G60600.2, AT5G62790.1	GO:0009240
607	⊕	GO:BP	GO:0046490	isopentenyl diphosphate metabolic process	0.00544	2.26	21	426	4	19.05	AT3G02780.1, AT4G11820.1, AT5G60600.2, AT5G62790.1	GO:0046490
164	⊕	GO:CC	GO:0009523	photosystem II	0.00558	2.25	78	453	7	8.97	AT1G06680.1, AT1G16720.1, AT1G55480.1, AT3G55330.1, AT4G21280.1, AT5G11450.1, AT5G27390.1	GO:0009523
272	⊕	GO:MF	GO:0070717	poly-purine tract binding	0.00582	2.23	23	441	4	17.39	AT1G11650.1, AT1G49600.1, AT4G27000.1, AT4G34110.1	GO:0070717
178	⊕	GO:BP	GO:0006066	alcohol metabolic process	0.00632	2.2	182	426	11	6.04	AT1G07250.1, AT1G22940.1, AT1G52400.1, AT2G21170.1, AT2G29630.1, AT3G09810.1, AT4G33070.1, AT5G03290.1, AT5G07370.1, AT5G51970.1, AT5G67030.1	GO:0006066
187	⊕	GO:MF	GO:0004601	peroxidase activity	0.0065	2.19	132	441	9	6.82	AT1G07890.1, AT1G20630.1, AT1G35720.1, AT2G25080.1, AT2G30860.1, AT2G31570.1, AT3G11630.1, AT3G32980.1, AT3G52960.1	GO:0004601
551	⊕	GO:BP	GO:0016482	cytosolic transport	0.00647	2.19	38	426	5	13.16	AT2G17790.1, AT3G51310.1, AT4G24550.1, AT4G30160.1, AT5G54440.1	GO:0016482
245	⊕	GO:MF	GO:0010297	heteropolysaccharide binding	0.00657	2.18	3	441	2	66.67	AT1G09340.1, AT2G40840.1	GO:0010297
362	⊕	GO:MF	GO:0003852	2-isopropylmalate synthase activity	0.00657	2.18	3	441	2	66.67	AT1G18500.1, AT1G74040.2	GO:0003852
425	⊕	GO:MF	GO:0004075	biotin carboxylase activity	0.00657	2.18	3	441	2	66.67	AT1G36160.1, AT1G36180.1	GO:0004075
458	⊕	GO:MF	GO:0004708	MAP kinase kinase activity	0.00657	2.18	11	441	3	27.27	AT1G51660.1, AT4G26070.1, AT4G29810.1	GO:0004708
466	⊕	GO:MF	GO:0016853	isomerase activity	0.00657	2.18	281	441	14	4.98	AT1G53780.1, AT1G60550.1, AT1G70820.1, AT2G21170.1, AT3G02780.1, AT3G04880.1, AT3G08900.1, AT3G10270.1, AT3G10690.1, AT3G14790.1, AT3G15520.1, AT5G16510.1, AT5G27390.1, AT5G28840.1	GO:0016853
495	⊕	GO:MF	GO:0004616	phosphogluconate dehydrogenase (decarboxylating) activity	0.00657	2.18	3	441	2	66.67	AT1G64190.1, AT5G41670.1	GO:0004616
628	⊕	GO:MF	GO:0140663	ATP-dependent FeS chaperone activity	0.00657	2.18	3	441	2	66.67	AT3G24430.1, AT5G50960.1	GO:0140663
661	⊕	GO:MF	GO:0016630	protochlorophyllide reductase activity	0.00657	2.18	3	441	2	66.67	AT4G27440.1, AT5G54190.1	GO:0016630
665	⊕	GO:MF	GO:0004775	succinate-CoA ligase (ADP-forming) activity	0.00657	2.18	3	441	2	66.67	AT5G08300.1, AT5G23250.2	GO:0004775
666	⊕	GO:MF	GO:0004774	succinate-CoA ligase activity	0.00657	2.18	3	441	2	66.67	AT5G08300.1, AT5G23250.2	GO:0004774
191	⊕	GO:BP	GO:1990748	cellular detoxification	0.00682	2.17	184	426	11	5.98	AT1G07890.1, AT1G20630.1, AT1G35720.1, AT2G25080.1, AT2G30860.1, AT2G31570.1, AT2G41530.1, AT3G11630.1, AT3G32980.1, AT3G52960.1, AT5G44070.1	GO:1990748
439	⊕	GO:BP	GO:0006167	AMP biosynthetic process	0.00677	2.17	10	426	3	30	AT1G36280.1, AT3G09820.1, AT4G12440.1	GO:0006167
270	⊕	GO:CC	GO:0030662	coated vesicle membrane	0.00688	2.16	81	453	7	8.64	AT1G10730.1, AT1G52360.1, AT1G60780.1, AT2G21390.1, AT3G11130.1, AT5G05010.1, AT5G11490.1	GO:0030662
49	⊕	GO:BP	GO:0019538	protein metabolic process	0.00715	2.15	5127	426	124	2.42	AT1G02560.1, AT1G04170.1, AT1G04480.1, AT1G05180.1, AT1G06430.1, AT1G08450.1, AT1G09100.1, AT1G09130.1, AT1G09340.1, AT1G11910.1, AT1G16720.1, AT1G17720.1, AT1G18450.1, AT1G20200.1, AT1G22780.1, AT1G23410.1, AT1G25490.1, AT1G26910.2, AT1G27400.1, AT1G29150.1, AT1G30230.1, AT1G45000.1, AT1G47250.1, AT1G48350.1, AT1G48410.1, AT1G48630.1, AT1G48830.1, AT1G49970.1, AT1G50670.1, AT1G51660.1, AT1G51710…	GO:0019538
186	⊕	GO:BP	GO:0097237	cellular response to toxic substance	0.00709	2.15	185	426	11	5.95	AT1G07890.1, AT1G20630.1, AT1G35720.1, AT2G25080.1, AT2G30860.1, AT2G31570.1, AT2G41530.1, AT3G11630.1, AT3G32980.1, AT3G52960.1, AT5G44070.1	GO:0097237
12	⊕	GO:CC	GO:0098588	bounding membrane of organelle	0.00716	2.14	1488	453	49	3.29	AT1G01200.1, AT1G06430.1, AT1G06680.1, AT1G10290.1, AT1G10730.1, AT1G16720.1, AT1G52360.1, AT1G52410.1, AT1G55480.1, AT1G60780.1, AT1G65260.1, AT1G67700.1, AT1G67930.1, AT1G73110.1, AT2G01690.1, AT2G17390.1, AT2G17790.1, AT2G20260.1, AT2G21390.1, AT2G22360.1, AT2G25080.1, AT2G35490.1, AT2G36250.1, AT2G44920.2, AT2G45770.1, AT2G46820.1, AT2G47940.1, AT3G01390.1, AT3G08560.1, AT3G11130.1, AT3G15520…	GO:0098588
426	⊕	KEGG	map00640	Propanoate metabolism	0.00725	2.14	40	265	8	20	AT1G36160.1, AT1G36180.1, AT2G38040.1, AT3G16950.1, AT4G16155.1, AT5G08300.1, AT5G23250.2, AT5G36880.1	map00640
459	⊕	GO:CC	GO:0005798	Golgi-associated vesicle	0.00747	2.13	42	453	5	11.9	AT1G52360.1, AT1G60780.1, AT2G21390.1, AT3G11130.1, AT5G05010.1	GO:0005798
195	⊕	GO:MF	GO:0016684	oxidoreductase activity, acting on peroxide as acceptor	0.00791	2.1	138	441	9	6.52	AT1G07890.1, AT1G20630.1, AT1G35720.1, AT2G25080.1, AT2G30860.1, AT2G31570.1, AT3G11630.1, AT3G32980.1, AT3G52960.1	GO:0016684
234	⊕	GO:BP	GO:0009657	plastid organization	0.00799	2.1	280	426	14	5	AT1G09340.1, AT1G32500.1, AT1G49970.1, AT1G65260.1, AT2G21170.1, AT2G33150.1, AT2G36250.1, AT2G46820.1, AT2G47940.1, AT5G10470.1, AT5G24020.1, AT5G45390.1, AT5G58270.1, AT5G64050.1	GO:0009657
257	⊕	GO:MF	GO:0016763	pentosyltransferase activity	0.008	2.1	64	441	6	9.38	AT1G09795.1, AT1G55810.1, AT3G53900.1, AT4G12440.1, AT4G26510.1, AT5G40870.1	GO:0016763
536	⊕	GO:MF	GO:0009044	xylan 1,4-beta-xylosidase activity	0.00791	2.1	12	441	3	25	AT1G78060.1, AT3G10740.1, AT5G64570.1	GO:0009044
539	⊕	GO:MF	GO:0046556	alpha-L-arabinofuranosidase activity	0.00791	2.1	12	441	3	25	AT1G78060.1, AT3G10740.1, AT5G64570.1	GO:0046556
561	⊕	GO:CC	GO:0016469	proton-transporting two-sector ATPase complex	0.0079	2.1	62	453	6	9.68	AT2G19680.1, AT3G01390.1, AT3G08560.1, AT3G42050.1, AT3G52300.1, AT4G11150.1	GO:0016469
562	⊕	GO:MF	GO:0051540	metal cluster binding	0.00811	2.09	139	441	9	6.47	AT2G20860.1, AT2G29630.1, AT3G24430.1, AT3G54900.1, AT4G19210.1, AT5G08530.1, AT5G50960.1, AT5G60600.2, AT5G65720.1	GO:0051540
564	⊕	GO:MF	GO:0051536	iron-sulfur cluster binding	0.00811	2.09	139	441	9	6.47	AT2G20860.1, AT2G29630.1, AT3G24430.1, AT3G54900.1, AT4G19210.1, AT5G08530.1, AT5G50960.1, AT5G60600.2, AT5G65720.1	GO:0051536
367	⊕	GO:BP	GO:0009423	chorismate biosynthetic process	0.00882	2.05	11	426	3	27.27	AT1G22410.1, AT4G33510.1, AT4G39980.1	GO:0009423
440	⊕	GO:BP	GO:0046033	AMP metabolic process	0.00882	2.05	11	426	3	27.27	AT1G36280.1, AT3G09820.1, AT4G12440.1	GO:0046033
569	⊕	GO:BP	GO:0043101	purine-containing compound salvage	0.00882	2.05	11	426	3	27.27	AT2G23420.1, AT3G09820.1, AT4G12440.1	GO:0043101
570	⊕	GO:BP	GO:0032261	purine nucleotide salvage	0.00882	2.05	11	426	3	27.27	AT2G23420.1, AT3G09820.1, AT4G12440.1	GO:0032261
642	⊕	GO:BP	GO:0000050	urea cycle	0.00926	2.03	3	426	2	66.67	AT4G08870.1, AT4G08900.1	GO:0000050
654	⊕	GO:BP	GO:0019474	L-lysine catabolic process to acetyl-CoA	0.00926	2.03	3	426	2	66.67	AT4G26910.1, AT5G55070.1	GO:0019474
655	⊕	GO:BP	GO:0046440	L-lysine metabolic process	0.00926	2.03	3	426	2	66.67	AT4G26910.1, AT5G55070.1	GO:0046440
657	⊕	GO:BP	GO:0033512	L-lysine catabolic process to acetyl-CoA via saccharopine	0.00926	2.03	3	426	2	66.67	AT4G26910.1, AT5G55070.1	GO:0033512
658	⊕	GO:BP	GO:0019477	L-lysine catabolic process	0.00926	2.03	3	426	2	66.67	AT4G26910.1, AT5G55070.1	GO:0019477
660	⊕	GO:BP	GO:0006554	lysine catabolic process	0.00926	2.03	3	426	2	66.67	AT4G26910.1, AT5G55070.1	GO:0006554
531	⊕	GO:MF	GO:0050997	quaternary ammonium group binding	0.00981	2.01	13	441	3	23.08	AT1G76180.1, AT3G55410.1, AT4G33070.1	GO:0050997
552	⊕	GO:CC	GO:0030906	retromer, cargo-selective complex	0.00985	2.01	4	453	2	50	AT2G17790.1, AT3G51310.1	GO:0030906
651	⊕	GO:CC	GO:0030124	AP-4 adaptor complex	0.00985	2.01	4	453	2	50	AT4G24550.1, AT5G11490.1	GO:0030124
216	⊕	GO:BP	GO:0046907	intracellular transport	0.0109	1.96	725	426	26	3.59	AT1G08730.1, AT1G10290.1, AT1G10730.1, AT1G27310.1, AT1G52360.1, AT1G60780.1, AT2G17390.1, AT2G17790.1, AT2G21390.1, AT2G45770.1, AT3G11130.1, AT3G43300.1, AT3G51310.1, AT3G53110.1, AT4G13350.1, AT4G19210.1, AT4G24550.1, AT4G30160.1, AT5G03340.1, AT5G05010.1, AT5G06120.1, AT5G10470.1, AT5G11490.1, AT5G19820.1, AT5G46630.2, AT5G54440.1	GO:0046907
220	⊕	GO:BP	GO:0042176	regulation of protein catabolic process	0.0109	1.96	87	426	7	8.05	AT1G09100.1, AT1G20200.1, AT1G45000.1, AT1G51710.1, AT1G53780.1, AT1G75990.1, AT2G20140.1	GO:0042176
388	⊕	GO:BP	GO:0019318	hexose metabolic process	0.0109	1.96	139	426	9	6.47	AT1G24280.1, AT1G70820.1, AT2G21170.1, AT3G04120.1, AT3G54050.1, AT4G16130.1, AT4G38970.2, AT5G13110.1, AT5G35790.1	GO:0019318
566	⊕	GO:BP	GO:0006094	gluconeogenesis	0.0113	1.95	26	426	4	15.38	AT2G21170.1, AT3G04120.1, AT3G54050.1, AT4G38970.2	GO:0006094
580	⊕	GO:BP	GO:0008064	regulation of actin polymerization or depolymerization	0.0113	1.95	26	426	4	15.38	AT2G43800.1, AT3G57410.1, AT4G16340.1, AT4G30160.1	GO:0008064
581	⊕	GO:BP	GO:0030832	regulation of actin filament length	0.0113	1.95	26	426	4	15.38	AT2G43800.1, AT3G57410.1, AT4G16340.1, AT4G30160.1	GO:0030832
398	⊕	GO:MF	GO:0016884	carbon-nitrogen ligase activity, with glutamine as amido-N-donor	0.0119	1.92	14	441	3	21.43	AT1G29900.1, AT1G63660.1, AT1G74260.1	GO:0016884
456	⊕	GO:MF	GO:0050308	sugar-phosphatase activity	0.0119	1.92	14	441	3	21.43	AT1G51420.1, AT3G10940.1, AT3G54050.1	GO:0050308
543	⊕	GO:MF	GO:0140662	ATP-dependent protein folding chaperone	0.0119	1.92	48	441	5	10.42	AT1G79920.1, AT1G79930.1, AT4G32208.1, AT5G16070.1, AT5G56030.1	GO:0140662
624	⊕	GO:MF	GO:0004148	dihydrolipoyl dehydrogenase activity	0.0119	1.92	4	441	2	50	AT3G16950.1, AT4G16155.1	GO:0004148
241	⊕	GO:BP	GO:0006417	regulation of translation	0.0122	1.91	200	426	11	5.5	AT1G09340.1, AT1G48410.1, AT1G48630.1, AT2G27040.1, AT2G45810.1, AT3G24830.1, AT3G61240.1, AT4G18040.1, AT4G24800.1, AT4G34110.1, AT5G57870.1	GO:0006417
317	⊕	GO:BP	GO:0009145	purine nucleoside triphosphate biosynthetic process	0.0126	1.9	45	426	5	11.11	AT1G16350.1, AT1G79470.1, AT2G19680.1, AT3G01390.1, AT3G52300.1	GO:0009145
330	⊕	GO:BP	GO:0009206	purine ribonucleoside triphosphate biosynthetic process	0.0126	1.9	45	426	5	11.11	AT1G16350.1, AT1G79470.1, AT2G19680.1, AT3G01390.1, AT3G52300.1	GO:0009206
144	⊕	GO:BP	GO:0009311	oligosaccharide metabolic process	0.0127	1.89	90	426	7	7.78	AT1G06410.1, AT1G51420.1, AT1G64190.1, AT2G40840.1, AT3G54050.1, AT5G11110.1, AT5G41670.1	GO:0009311
248	⊕	GO:BP	GO:0034248	regulation of amide metabolic process	0.013	1.89	202	426	11	5.45	AT1G09340.1, AT1G48410.1, AT1G48630.1, AT2G27040.1, AT2G45810.1, AT3G24830.1, AT3G61240.1, AT4G18040.1, AT4G24800.1, AT4G34110.1, AT5G57870.1	GO:0034248
442	⊕	GO:MF	GO:0140101	catalytic activity, acting on a tRNA	0.013	1.89	150	441	9	6	AT1G36310.1, AT2G04842.1, AT2G31170.1, AT3G02760.1, AT3G58140.1, AT4G13780.1, AT4G33760.1, AT5G16715.1, AT5G64050.1	GO:0140101
455	⊕	GO:MF	GO:0019203	carbohydrate phosphatase activity	0.0132	1.88	30	441	4	13.33	AT1G51420.1, AT3G01510.1, AT3G10940.1, AT3G54050.1	GO:0019203
460	⊕	GO:CC	GO:0030126	COPI vesicle coat	0.0133	1.88	15	453	3	20	AT1G52360.1, AT2G21390.1, AT5G05010.1	GO:0030126
464	⊕	GO:CC	GO:0030663	COPI-coated vesicle membrane	0.0133	1.88	15	453	3	20	AT1G52360.1, AT2G21390.1, AT5G05010.1	GO:0030663
351	⊕	GO:MF	GO:0016830	carbon-carbon lyase activity	0.0134	1.87	123	441	8	6.5	AT1G18270.1, AT1G60550.1, AT1G72970.1, AT2G29630.1, AT2G47650.2, AT3G14940.1, AT4G33070.1, AT4G38970.2	GO:0016830
383	⊕	GO:CC	GO:0005759	mitochondrial matrix	0.0135	1.87	170	453	10	5.88	AT1G23800.1, AT1G59900.1, AT2G20860.1, AT2G44350.1, AT3G13930.1, AT3G19170.1, AT3G58140.1, AT4G34030.1, AT5G46180.1, ATCG00790.1	GO:0005759
457	⊕	GO:BP	GO:0005986	sucrose biosynthetic process	0.0135	1.87	13	426	3	23.08	AT1G51420.1, AT3G54050.1, AT5G11110.1	GO:0005986
567	⊕	GO:BP	GO:0019682	glyceraldehyde-3-phosphate metabolic process	0.0135	1.87	13	426	3	23.08	AT2G21170.1, AT5G60600.2, AT5G62790.1	GO:0019682
577	⊕	GO:BP	GO:0030835	negative regulation of actin filament depolymerization	0.0135	1.87	13	426	3	23.08	AT2G43800.1, AT3G57410.1, AT4G30160.1	GO:0030835
579	⊕	GO:BP	GO:0051693	actin filament capping	0.0135	1.87	13	426	3	23.08	AT2G43800.1, AT3G57410.1, AT4G30160.1	GO:0051693
243	⊕	GO:BP	GO:0009658	chloroplast organization	0.0137	1.86	204	426	11	5.39	AT1G09340.1, AT1G49970.1, AT2G21170.1, AT2G36250.1, AT2G46820.1, AT2G47940.1, AT5G10470.1, AT5G24020.1, AT5G45390.1, AT5G58270.1, AT5G64050.1	GO:0009658
263	⊕	GO:CC	GO:0099080	supramolecular complex	0.0141	1.85	383	453	17	4.44	AT1G10290.1, AT1G49600.1, AT1G75780.1, AT2G22125.1, AT2G45810.1, AT3G48750.1, AT3G53110.1, AT3G57410.1, AT3G61240.1, AT4G14960.1, AT4G18040.1, AT4G20890.1, AT4G30160.1, AT4G33650.1, AT5G10470.1, AT5G44340.1, AT5G62690.1	GO:0099080
345	⊕	GO:MF	GO:0016783	sulfurtransferase activity	0.0141	1.85	15	441	3	20	AT1G16460.1, AT2G20860.1, AT5G65720.1	GO:0016783
550	⊕	GO:MF	GO:0016615	malate dehydrogenase activity	0.0141	1.85	15	441	3	20	AT2G13560.1, AT5G09660.3, AT5G58330.1	GO:0016615
224	⊕	GO:BP	GO:0051246	regulation of protein metabolic process	0.0146	1.84	478	426	19	3.97	AT1G09100.1, AT1G09340.1, AT1G20200.1, AT1G25490.1, AT1G45000.1, AT1G48410.1, AT1G48630.1, AT1G51710.1, AT1G53780.1, AT1G75990.1, AT2G20140.1, AT2G27040.1, AT2G45810.1, AT3G24830.1, AT3G61240.1, AT4G18040.1, AT4G24800.1, AT4G34110.1, AT5G57870.1	GO:0051246
565	⊕	GO:BP	GO:0019319	hexose biosynthetic process	0.0143	1.84	28	426	4	14.29	AT2G21170.1, AT3G04120.1, AT3G54050.1, AT4G38970.2	GO:0019319
132	⊕	GO:MF	GO:0016877	ligase activity, forming carbon-sulfur bonds	0.0147	1.83	51	441	5	9.8	AT1G05180.1, AT1G62940.1, AT5G08300.1, AT5G23250.2, AT5G36880.1	GO:0016877
184	⊕	GO:BP	GO:0009408	response to heat	0.0148	1.83	270	426	13	4.81	AT1G07890.1, AT1G35720.1, AT1G49600.1, AT1G64520.1, AT1G76080.1, AT1G79930.1, AT2G22360.1, AT2G39770.1, AT3G04120.1, AT3G53110.1, AT4G11260.1, AT5G56030.1, AT5G67030.1	GO:0009408
215	⊕	GO:MF	GO:0044877	protein-containing complex binding	0.0148	1.83	417	441	17	4.08	AT1G08730.1, AT1G10200.1, AT1G18450.1, AT1G32220.1, AT1G48630.1, AT1G51710.1, AT2G27040.1, AT2G43800.1, AT2G45770.1, AT3G12915.1, AT3G57410.1, AT4G19210.1, AT4G24800.1, AT4G30160.1, AT4G39100.1, AT5G14530.1, AT5G23540.1	GO:0044877
350	⊕	GO:MF	GO:0019888	protein phosphatase regulator activity	0.0147	1.83	51	441	5	9.8	AT1G17720.1, AT1G25490.1, AT1G51690.1, AT3G09880.1, AT5G28850.1	GO:0019888
97	⊕	GO:BP	GO:0006725	cellular aromatic compound metabolic process	0.015	1.82	5493	426	129	2.35	AT1G03475.1, AT1G05180.1, AT1G07370.1, AT1G07890.1, AT1G08520.1, AT1G09100.1, AT1G09340.1, AT1G11650.1, AT1G12230.1, AT1G15470.1, AT1G15710.1, AT1G16350.1, AT1G18450.1, AT1G22410.1, AT1G22940.1, AT1G24280.1, AT1G26570.1, AT1G29900.1, AT1G30230.1, AT1G36160.1, AT1G36180.1, AT1G36280.1, AT1G36310.1, AT1G44542.1, AT1G45000.1, AT1G48830.1, AT1G49600.1, AT1G49970.1, AT1G55810.1, AT1G59900.1, AT1G62940…	GO:0006725
225	⊕	GO:CC	GO:0008540	proteasome regulatory particle, base subcomplex	0.0153	1.82	16	453	3	18.75	AT1G09100.1, AT1G45000.1, AT2G20140.1	GO:0008540
462	⊕	GO:CC	GO:0030137	COPI-coated vesicle	0.0153	1.82	16	453	3	18.75	AT1G52360.1, AT2G21390.1, AT5G05010.1	GO:0030137
467	⊕	GO:CC	GO:0098572	stromal side of plastid thylakoid membrane	0.0153	1.82	5	453	2	40	AT1G55480.1, AT3G46780.1	GO:0098572
167	⊕	GO:CC	GO:0009543	chloroplast thylakoid lumen	0.0156	1.81	51	453	5	9.8	AT1G06680.1, AT2G44920.2, AT3G15520.1, AT3G55330.1, AT5G11450.1	GO:0009543
168	⊕	GO:CC	GO:0031978	plastid thylakoid lumen	0.0156	1.81	51	453	5	9.8	AT1G06680.1, AT2G44920.2, AT3G15520.1, AT3G55330.1, AT5G11450.1	GO:0031978
268	⊕	GO:CC	GO:0030665	clathrin-coated vesicle membrane	0.0156	1.81	32	453	4	12.5	AT1G10730.1, AT1G60780.1, AT3G11130.1, AT5G11490.1	GO:0030665
192	⊕	GO:MF	GO:0016209	antioxidant activity	0.0157	1.8	156	441	9	5.77	AT1G07890.1, AT1G20630.1, AT1G35720.1, AT2G25080.1, AT2G30860.1, AT2G31570.1, AT3G11630.1, AT3G32980.1, AT3G52960.1	GO:0016209
493	⊕	GO:MF	GO:0016878	acid-thiol ligase activity	0.0157	1.8	32	441	4	12.5	AT1G62940.1, AT5G08300.1, AT5G23250.2, AT5G36880.1	GO:0016878
496	⊕	GO:BP	GO:0046177	D-gluconate catabolic process	0.016	1.8	4	426	2	50	AT1G64190.1, AT5G41670.1	GO:0046177
497	⊕	GO:BP	GO:0046176	aldonic acid catabolic process	0.016	1.8	4	426	2	50	AT1G64190.1, AT5G41670.1	GO:0046176
499	⊕	GO:BP	GO:0019520	aldonic acid metabolic process	0.016	1.8	4	426	2	50	AT1G64190.1, AT5G41670.1	GO:0019520
501	⊕	GO:BP	GO:0019521	D-gluconate metabolic process	0.016	1.8	4	426	2	50	AT1G64190.1, AT5G41670.1	GO:0019521
591	⊕	GO:BP	GO:1901880	negative regulation of protein depolymerization	0.016	1.8	14	426	3	21.43	AT2G43800.1, AT3G57410.1, AT4G30160.1	GO:1901880
621	⊕	GO:MF	GO:0016417	S-acyltransferase activity	0.0157	1.8	32	441	4	12.5	AT3G13930.1, AT3G25860.1, AT4G26910.1, AT5G55070.1	GO:0016417
627	⊕	GO:BP	GO:0019860	uracil metabolic process	0.016	1.8	4	426	2	50	AT3G17810.1, AT3G53900.1	GO:0019860
637	⊕	GO:BP	GO:0051014	actin filament severing	0.016	1.8	4	426	2	50	AT3G57410.1, AT4G30160.1	GO:0051014
643	⊕	GO:BP	GO:0033388	putrescine biosynthetic process from arginine	0.016	1.8	4	426	2	50	AT4G08870.1, AT4G08900.1	GO:0033388
647	⊕	GO:BP	GO:0006527	arginine catabolic process	0.016	1.8	4	426	2	50	AT4G08900.1, AT5G46180.1	GO:0006527
652	⊕	GO:BP	GO:0043605	amide catabolic process	0.016	1.8	14	426	3	21.43	AT4G26910.1, AT5G46180.1, AT5G55070.1	GO:0043605
308	⊕	GO:MF	GO:0070403	NAD+ binding	0.0163	1.79	16	441	3	18.75	AT1G15710.1, AT2G47650.2, AT3G15290.1	GO:0070403
115	⊕	GO:BP	GO:0002181	cytoplasmic translation	0.0167	1.78	96	426	7	7.29	AT1G04170.1, AT1G27400.1, AT1G72730.1, AT2G46290.1, AT3G49910.1, AT4G18330.1, AT4G39520.1	GO:0002181
137	⊕	GO:BP	GO:0010035	response to inorganic substance	0.0164	1.78	793	426	27	3.4	AT1G05180.1, AT1G09340.1, AT1G11650.1, AT1G20630.1, AT1G35720.1, AT1G52400.1, AT1G59900.1, AT1G74910.3, AT1G76080.1, AT1G76180.1, AT2G22125.1, AT2G30860.1, AT2G39770.1, AT2G44060.1, AT3G04120.1, AT3G07720.1, AT3G11130.1, AT3G18490.1, AT3G52150.1, AT4G23400.1, AT4G26070.1, AT5G11170.1, AT5G23010.1, AT5G44070.1, AT5G56030.1, AT5G58270.1, AT5G67030.1	GO:0010035
170	⊕	GO:MF	GO:0003727	single-stranded RNA binding	0.0167	1.78	77	441	6	7.79	AT1G06680.1, AT1G11650.1, AT1G49600.1, AT4G27000.1, AT4G34110.1, AT5G11170.1	GO:0003727
277	⊕	GO:BP	GO:0005982	starch metabolic process	0.0164	1.78	71	426	6	8.45	AT1G11720.1, AT2G39930.1, AT2G40840.1, AT3G01510.1, AT3G10940.1, AT5G40870.1	GO:0005982
348	⊕	GO:MF	GO:0019208	phosphatase regulator activity	0.0167	1.78	53	441	5	9.43	AT1G17720.1, AT1G25490.1, AT1G51690.1, AT3G09880.1, AT5G28850.1	GO:0019208
515	⊕	GO:MF	GO:0047635	alanine-oxo-acid transaminase activity	0.0167	1.78	5	441	2	40	AT1G70580.1, AT1G72330.1	GO:0047635
517	⊕	GO:MF	GO:0004021	L-alanine:2-oxoglutarate aminotransferase activity	0.0167	1.78	5	441	2	40	AT1G70580.1, AT1G72330.1	GO:0004021
560	⊕	GO:MF	GO:0102040	fumarate reductase (menaquinone)	0.0167	1.78	5	441	2	40	AT2G18450.1, AT5G66760.1	GO:0102040
610	⊕	GO:MF	GO:0004449	isocitrate dehydrogenase (NAD+) activity	0.0167	1.78	5	441	2	40	AT3G09810.1, AT5G03290.1	GO:0004449
618	⊕	GO:MF	GO:0004742	dihydrolipoyllysine-residue acetyltransferase activity	0.0167	1.78	5	441	2	40	AT3G13930.1, AT3G25860.1	GO:0004742
620	⊕	GO:MF	GO:0016418	S-acetyltransferase activity	0.0167	1.78	5	441	2	40	AT3G13930.1, AT3G25860.1	GO:0016418
629	⊕	GO:MF	GO:0008753	NADPH dehydrogenase (quinone) activity	0.0167	1.78	5	441	2	40	AT3G27890.1, AT5G54500.1	GO:0008753
78	⊕	GO:BP	GO:1901360	organic cyclic compound metabolic process	0.0171	1.77	5621	426	131	2.33	AT1G03475.1, AT1G05180.1, AT1G07370.1, AT1G07890.1, AT1G08520.1, AT1G09100.1, AT1G09340.1, AT1G11650.1, AT1G12230.1, AT1G15470.1, AT1G15710.1, AT1G16350.1, AT1G18450.1, AT1G22410.1, AT1G22940.1, AT1G24280.1, AT1G26570.1, AT1G29900.1, AT1G30230.1, AT1G36160.1, AT1G36180.1, AT1G36280.1, AT1G36310.1, AT1G44542.1, AT1G45000.1, AT1G48830.1, AT1G49600.1, AT1G49970.1, AT1G55810.1, AT1G59900.1, AT1G62940…	GO:1901360
134	⊕	GO:BP	GO:0009628	response to abiotic stimulus	0.0171	1.77	2173	426	59	2.72	AT1G05180.1, AT1G07890.1, AT1G09340.1, AT1G18450.1, AT1G20630.1, AT1G23740.1, AT1G26910.2, AT1G35720.1, AT1G48410.1, AT1G49600.1, AT1G52400.1, AT1G52410.1, AT1G55480.1, AT1G55810.1, AT1G64520.1, AT1G72330.1, AT1G75780.1, AT1G76080.1, AT1G76180.1, AT1G79930.1, AT2G22125.1, AT2G22360.1, AT2G27820.1, AT2G39770.1, AT2G44060.1, AT3G04120.1, AT3G11130.1, AT3G11630.1, AT3G18490.1, AT3G18780.1, AT3G20810…	GO:0009628
488	⊕	GO:BP	GO:0046686	response to cadmium ion	0.0174	1.76	72	426	6	8.33	AT1G59900.1, AT1G74910.3, AT2G30860.1, AT5G11170.1, AT5G44070.1, AT5G58270.1	GO:0046686
88	⊕	KEGG	map01240	Biosynthesis of cofactors	0.0177	1.75	236	265	23	9.75	AT1G03475.1, AT1G22940.1, AT1G23800.1, AT1G26570.1, AT1G29900.1, AT1G36280.1, AT1G60550.1, AT1G74910.3, AT2G20860.1, AT2G23420.1, AT2G29630.1, AT2G38230.1, AT2G39770.1, AT3G16950.1, AT3G29360.1, AT4G16155.1, AT5G05980.1, AT5G27380.1, AT5G28840.1, AT5G39320.1, AT5G54500.1, AT5G64050.1, AT5G65720.1	map01240
247	⊕	GO:BP	GO:0005976	polysaccharide metabolic process	0.0178	1.75	490	426	19	3.88	AT1G09340.1, AT1G11720.1, AT1G30230.1, AT1G69940.1, AT1G78060.1, AT2G22125.1, AT2G39770.1, AT2G39930.1, AT2G40840.1, AT2G43050.1, AT3G01510.1, AT3G10740.1, AT3G10940.1, AT3G29360.1, AT3G59010.1, AT5G40870.1, AT5G53370.1, AT5G61680.1, AT5G64570.1	GO:0005976
519	⊕	KEGG	map00710	Carbon fixation in photosynthetic organisms	0.0177	1.75	68	265	10	14.71	AT1G70580.1, AT1G72330.1, AT2G13560.1, AT2G21170.1, AT3G04120.1, AT3G14940.1, AT3G54050.1, AT4G38970.2, AT5G09660.3, AT5G58330.1	map00710
217	⊕	GO:BP	GO:0051649	establishment of localization in cell	0.0184	1.74	761	426	26	3.42	AT1G08730.1, AT1G10290.1, AT1G10730.1, AT1G27310.1, AT1G52360.1, AT1G60780.1, AT2G17390.1, AT2G17790.1, AT2G21390.1, AT2G45770.1, AT3G11130.1, AT3G43300.1, AT3G51310.1, AT3G53110.1, AT4G13350.1, AT4G19210.1, AT4G24550.1, AT4G30160.1, AT5G03340.1, AT5G05010.1, AT5G06120.1, AT5G10470.1, AT5G11490.1, AT5G19820.1, AT5G46630.2, AT5G54440.1	GO:0051649
378	⊕	GO:BP	GO:0009110	vitamin biosynthetic process	0.0184	1.74	98	426	7	7.14	AT1G22940.1, AT1G60550.1, AT1G74910.3, AT2G29630.1, AT2G38230.1, AT2G39770.1, AT5G28840.1	GO:0009110
465	⊕	GO:CC	GO:0030120	vesicle coat	0.0181	1.74	53	453	5	9.43	AT1G52360.1, AT1G60780.1, AT2G21390.1, AT3G11130.1, AT5G05010.1	GO:0030120
309	⊕	GO:BP	GO:0006570	tyrosine metabolic process	0.0187	1.73	15	426	3	20	AT1G15710.1, AT2G27820.1, AT4G08870.1	GO:0006570
368	⊕	GO:BP	GO:0046417	chorismate metabolic process	0.0187	1.73	15	426	3	20	AT1G22410.1, AT4G33510.1, AT4G39980.1	GO:0046417
463	⊕	GO:BP	GO:0006891	intra-Golgi vesicle-mediated transport	0.0188	1.73	31	426	4	12.9	AT1G52360.1, AT1G67930.1, AT2G21390.1, AT5G54440.1	GO:0006891
575	⊕	GO:BP	GO:0110053	regulation of actin filament organization	0.0188	1.73	31	426	4	12.9	AT2G43800.1, AT3G57410.1, AT4G16340.1, AT4G30160.1	GO:0110053
583	⊕	GO:BP	GO:0030834	regulation of actin filament depolymerization	0.0187	1.73	15	426	3	20	AT2G43800.1, AT3G57410.1, AT4G30160.1	GO:0030834
312	⊕	GO:BP	GO:0009205	purine ribonucleoside triphosphate metabolic process	0.019	1.72	51	426	5	9.8	AT1G16350.1, AT1G79470.1, AT2G19680.1, AT3G01390.1, AT3G52300.1	GO:0009205
603	⊕	GO:MF	GO:0042625	ATPase-coupled ion transmembrane transporter activity	0.0199	1.7	35	441	4	11.43	AT3G01390.1, AT3G08560.1, AT3G42050.1, AT4G11150.1	GO:0042625
604	⊕	GO:MF	GO:0044769	ATPase activity, coupled to transmembrane movement of ions, rotational mechanism	0.0199	1.7	35	441	4	11.43	AT3G01390.1, AT3G08560.1, AT3G42050.1, AT4G11150.1	GO:0044769
605	⊕	GO:MF	GO:0046961	proton-transporting ATPase activity, rotational mechanism	0.0199	1.7	35	441	4	11.43	AT3G01390.1, AT3G08560.1, AT3G42050.1, AT4G11150.1	GO:0046961
469	⊕	GO:CC	GO:0009509	chromoplast	0.0213	1.67	6	453	2	33.33	AT1G55480.1, AT4G14210.1	GO:0009509
537	⊕	GO:BP	GO:0045493	xylan catabolic process	0.022	1.66	16	426	3	18.75	AT1G78060.1, AT3G10740.1, AT5G64570.1	GO:0045493
541	⊕	GO:BP	GO:2000895	hemicellulose catabolic process	0.022	1.66	16	426	3	18.75	AT1G78060.1, AT3G10740.1, AT5G64570.1	GO:2000895
586	⊕	GO:BP	GO:0043242	negative regulation of protein-containing complex disassembly	0.022	1.66	16	426	3	18.75	AT2G43800.1, AT3G57410.1, AT4G30160.1	GO:0043242
622	⊕	GO:BP	GO:0046685	response to arsenic-containing substance	0.022	1.66	16	426	3	18.75	AT3G16950.1, AT4G16155.1, AT5G44070.1	GO:0046685
230	⊕	GO:BP	GO:0048229	gametophyte development	0.0222	1.65	465	426	18	3.87	AT1G09100.1, AT1G18450.1, AT1G62940.1, AT1G72970.1, AT1G74260.1, AT2G01690.1, AT2G22125.1, AT2G31170.1, AT3G09880.1, AT3G48750.1, AT3G55610.1, AT4G24510.1, AT4G35420.1, AT5G07370.1, AT5G11110.1, AT5G19820.1, AT5G52820.1, AT5G58270.1	GO:0048229
381	⊕	GO:BP	GO:0042364	water-soluble vitamin biosynthetic process	0.023	1.64	77	426	6	7.79	AT1G22940.1, AT1G74910.3, AT2G29630.1, AT2G38230.1, AT2G39770.1, AT5G28840.1	GO:0042364
193	⊕	GO:BP	GO:0098754	detoxification	0.0233	1.63	289	426	13	4.5	AT1G07890.1, AT1G20630.1, AT1G35720.1, AT2G25080.1, AT2G30860.1, AT2G31570.1, AT2G41530.1, AT3G11630.1, AT3G32980.1, AT3G44300.1, AT3G52960.1, AT3G61440.1, AT5G44070.1	GO:0098754
307	⊕	GO:BP	GO:0006571	tyrosine biosynthetic process	0.0233	1.63	5	426	2	40	AT1G15710.1, AT2G27820.1	GO:0006571
340	⊕	GO:BP	GO:0009144	purine nucleoside triphosphate metabolic process	0.0233	1.63	54	426	5	9.26	AT1G16350.1, AT1G79470.1, AT2G19680.1, AT3G01390.1, AT3G52300.1	GO:0009144
403	⊕	GO:BP	GO:0006541	glutamine metabolic process	0.0233	1.63	54	426	5	9.26	AT1G29900.1, AT1G48470.1, AT1G63660.1, AT1G74260.1, AT4G30530.1	GO:0006541
511	⊕	GO:BP	GO:0006524	alanine catabolic process	0.0233	1.63	5	426	2	40	AT1G70580.1, AT1G72330.1	GO:0006524
512	⊕	GO:BP	GO:0042853	L-alanine catabolic process	0.0233	1.63	5	426	2	40	AT1G70580.1, AT1G72330.1	GO:0042853
513	⊕	GO:BP	GO:0042851	L-alanine metabolic process	0.0233	1.63	5	426	2	40	AT1G70580.1, AT1G72330.1	GO:0042851
514	⊕	GO:BP	GO:0006522	alanine metabolic process	0.0233	1.63	5	426	2	40	AT1G70580.1, AT1G72330.1	GO:0006522
516	⊕	GO:BP	GO:0009078	pyruvate family amino acid metabolic process	0.0233	1.63	5	426	2	40	AT1G70580.1, AT1G72330.1	GO:0009078
520	⊕	GO:BP	GO:0009080	pyruvate family amino acid catabolic process	0.0233	1.63	5	426	2	40	AT1G70580.1, AT1G72330.1	GO:0009080
630	⊕	GO:BP	GO:0051410	detoxification of nitrogen compound	0.0233	1.63	5	426	2	40	AT3G44300.1, AT3G61440.1	GO:0051410
441	⊕	GO:MF	GO:0140098	catalytic activity, acting on RNA	0.0239	1.62	556	441	20	3.6	AT1G36310.1, AT1G48410.1, AT1G72730.1, AT2G04842.1, AT2G27040.1, AT2G31170.1, AT2G42520.1, AT2G45810.1, AT3G02760.1, AT3G53110.1, AT3G58140.1, AT3G61240.1, AT4G13780.1, AT4G21710.1, AT4G25630.1, AT4G33760.1, AT4G35800.1, AT5G11170.1, AT5G16715.1, AT5G64050.1	GO:0140098
597	⊕	GO:MF	GO:0070402	NADPH binding	0.0239	1.62	6	441	2	33.33	AT2G44040.1, AT5G62790.1	GO:0070402
147	⊕	GO:MF	GO:0008270	zinc ion binding	0.0247	1.61	636	441	22	3.46	AT1G06430.1, AT1G12230.1, AT1G18270.1, AT1G23740.1, AT1G35720.1, AT2G13560.1, AT2G44350.1, AT3G52300.1, AT3G55410.1, AT3G62330.1, AT4G26910.1, AT4G33580.1, AT4G34030.1, AT4G34230.1, AT4G37990.1, AT5G03290.1, AT5G46180.1, AT5G51970.1, AT5G55070.1, AT5G63620.1, AT5G64050.1, AT5G65720.1	GO:0008270
572	⊕	GO:MF	GO:0016836	hydro-lyase activity	0.0245	1.61	84	441	6	7.14	AT2G27820.1, AT3G14790.1, AT3G15290.1, AT3G44300.1, AT3G58990.1, AT4G33580.1	GO:0016836
356	⊕	KEGG	map00290	Valine, leucine and isoleucine biosynthesis	0.025	1.6	21	265	5	23.81	AT1G18500.1, AT1G74040.2, AT3G10050.1, AT3G58990.1, AT5G16290.1	map00290
538	⊕	GO:BP	GO:0044347	cell wall polysaccharide catabolic process	0.0249	1.6	17	426	3	17.65	AT1G78060.1, AT3G10740.1, AT5G64570.1	GO:0044347
590	⊕	GO:BP	GO:0030837	negative regulation of actin filament polymerization	0.0249	1.6	17	426	3	17.65	AT2G43800.1, AT3G57410.1, AT4G30160.1	GO:0030837
636	⊕	GO:BP	GO:0006560	proline metabolic process	0.0249	1.6	17	426	3	17.65	AT3G55610.1, AT4G08870.1, AT5G46180.1	GO:0006560
478	⊕	GO:MF	GO:0019205	nucleobase-containing compound kinase activity	0.026	1.59	38	441	4	10.53	AT1G55810.1, AT3G09820.1, AT4G26510.1, AT5G40870.1	GO:0019205
201	⊕	GO:BP	GO:0009636	response to toxic substance	0.0264	1.58	330	426	14	4.24	AT1G07890.1, AT1G20630.1, AT1G35720.1, AT2G25080.1, AT2G30860.1, AT2G31570.1, AT2G41530.1, AT3G11630.1, AT3G32980.1, AT3G44300.1, AT3G52960.1, AT3G61440.1, AT5G02790.1, AT5G44070.1	GO:0009636
306	⊕	GO:BP	GO:0009073	aromatic amino acid family biosynthetic process	0.0264	1.58	56	426	5	8.93	AT1G15710.1, AT1G22410.1, AT2G27820.1, AT4G33510.1, AT4G39980.1	GO:0009073
143	⊕	GO:BP	GO:0046351	disaccharide biosynthetic process	0.0268	1.57	35	426	4	11.43	AT1G06410.1, AT1G51420.1, AT3G54050.1, AT5G11110.1	GO:0046351
189	⊕	GO:BP	GO:0098869	cellular oxidant detoxification	0.0266	1.57	165	426	9	5.45	AT1G07890.1, AT1G20630.1, AT1G35720.1, AT2G25080.1, AT2G30860.1, AT2G31570.1, AT3G11630.1, AT3G32980.1, AT3G52960.1	GO:0098869
194	⊕	GO:BP	GO:0048316	seed development	0.0266	1.57	630	426	22	3.49	AT1G07890.1, AT1G16460.1, AT1G32440.1, AT1G32500.1, AT1G36160.1, AT1G64520.1, AT2G04842.1, AT3G04120.1, AT3G11270.1, AT3G48750.1, AT3G55610.1, AT3G61140.1, AT4G01560.1, AT4G11150.1, AT4G11260.1, AT4G13940.3, AT4G14510.1, AT4G35420.1, AT5G07370.1, AT5G16715.1, AT5G52920.1, AT5G63800.1	GO:0048316
384	⊕	GO:MF	GO:0016903	oxidoreductase activity, acting on the aldehyde or oxo group of donors	0.0272	1.56	61	441	5	8.2	AT1G23800.1, AT1G59900.1, AT3G04120.1, AT3G55410.1, AT3G55610.1	GO:0016903
354	⊕	GO:CC	GO:1904949	ATPase complex	0.0284	1.55	135	453	8	5.93	AT1G18450.1, AT1G65650.1, AT2G19680.1, AT3G01390.1, AT3G08560.1, AT3G42050.1, AT3G52300.1, AT4G11150.1	GO:1904949
479	⊕	GO:BP	GO:0046036	CTP metabolic process	0.0283	1.55	18	426	3	16.67	AT1G55810.1, AT4G26510.1, AT5G40870.1	GO:0046036
480	⊕	GO:BP	GO:0006241	CTP biosynthetic process	0.0283	1.55	18	426	3	16.67	AT1G55810.1, AT4G26510.1, AT5G40870.1	GO:0006241
485	⊕	GO:BP	GO:0009208	pyrimidine ribonucleoside triphosphate metabolic process	0.0283	1.55	18	426	3	16.67	AT1G55810.1, AT4G26510.1, AT5G40870.1	GO:0009208
487	⊕	GO:BP	GO:0009209	pyrimidine ribonucleoside triphosphate biosynthetic process	0.0283	1.55	18	426	3	16.67	AT1G55810.1, AT4G26510.1, AT5G40870.1	GO:0009209
549	⊕	GO:BP	GO:0006108	malate metabolic process	0.0283	1.55	18	426	3	16.67	AT2G13560.1, AT5G09660.3, AT5G58330.1	GO:0006108
589	⊕	GO:BP	GO:1901879	regulation of protein depolymerization	0.0283	1.55	18	426	3	16.67	AT2G43800.1, AT3G57410.1, AT4G30160.1	GO:1901879
127	⊕	GO:CC	GO:0015934	large ribosomal subunit	0.0287	1.54	193	453	10	5.18	AT1G04480.1, AT1G26910.2, AT1G27400.1, AT3G09630.1, AT3G24830.1, AT3G25920.1, AT3G49910.1, AT4G01310.1, AT5G13510.1, ATCG00790.1	GO:0015934
619	⊕	GO:CC	GO:0045254	pyruvate dehydrogenase complex	0.0287	1.54	7	453	2	28.57	AT3G13930.1, AT3G25860.1	GO:0045254
600	⊕	KEGG	map00261	Monobactam biosynthesis	0.0295	1.53	14	265	4	28.57	AT2G44040.1, AT4G19710.2, AT5G13280.1, AT5G14060.1	map00261
104	⊕	GO:BP	GO:0002183	cytoplasmic translational initiation	0.0319	1.5	37	426	4	10.81	AT1G04170.1, AT1G72730.1, AT2G46290.1, AT4G18330.1	GO:0002183
366	⊕	GO:BP	GO:0043650	dicarboxylic acid biosynthetic process	0.0319	1.5	37	426	4	10.81	AT1G22410.1, AT2G44040.1, AT4G33510.1, AT4G39980.1	GO:0043650
447	⊕	GO:BP	GO:0070189	kynurenine metabolic process	0.0319	1.5	6	426	2	33.33	AT1G44542.1, AT1G77670.1	GO:0070189
471	⊕	GO:BP	GO:0009148	pyrimidine nucleoside triphosphate biosynthetic process	0.0319	1.5	19	426	3	15.79	AT1G55810.1, AT4G26510.1, AT5G40870.1	GO:0009148
502	⊕	GO:BP	GO:0009647	skotomorphogenesis	0.0319	1.5	6	426	2	33.33	AT1G64520.1, AT5G54190.1	GO:0009647
505	⊕	GO:MF	GO:0052689	carboxylic ester hydrolase activity	0.0318	1.5	210	441	10	4.76	AT1G69940.1, AT2G41530.1, AT2G43050.1, AT3G05910.1, AT3G59010.1, AT4G19410.1, AT5G16715.1, AT5G24420.1, AT5G53370.1, AT5G61680.1	GO:0052689
555	⊕	GO:MF	GO:0008177	succinate dehydrogenase (ubiquinone) activity	0.0318	1.5	7	441	2	28.57	AT2G18450.1, AT5G66760.1	GO:0008177
592	⊕	GO:BP	GO:0031333	negative regulation of protein-containing complex assembly	0.0319	1.5	19	426	3	15.79	AT2G43800.1, AT3G57410.1, AT4G30160.1	GO:0031333
593	⊕	GO:BP	GO:0032272	negative regulation of protein polymerization	0.0319	1.5	19	426	3	15.79	AT2G43800.1, AT3G57410.1, AT4G30160.1	GO:0032272
601	⊕	GO:BP	GO:0072350	tricarboxylic acid metabolic process	0.0319	1.5	19	426	3	15.79	AT2G44350.1, AT3G09810.1, AT5G03290.1	GO:0072350
608	⊕	GO:BP	GO:0051775	response to redox state	0.0319	1.5	6	426	2	33.33	AT3G04120.1, AT5G58330.1	GO:0051775
631	⊕	GO:BP	GO:0051646	mitochondrion localization	0.0319	1.5	6	426	2	33.33	AT3G52140.1, AT5G46180.1	GO:0051646
640	⊕	GO:BP	GO:0009446	putrescine biosynthetic process	0.0319	1.5	6	426	2	33.33	AT4G08870.1, AT4G08900.1	GO:0009446
139	⊕	GO:CC	GO:0071944	cell periphery	0.0324	1.49	3238	453	88	2.72	AT1G06400.1, AT1G07890.1, AT1G09310.1, AT1G10200.1, AT1G10290.1, AT1G20630.1, AT1G22530.1, AT1G22780.1, AT1G25490.1, AT1G30230.1, AT1G35720.1, AT1G45000.1, AT1G48830.1, AT1G69940.1, AT1G72160.1, AT1G72730.1, AT1G76180.1, AT1G78060.1, AT2G21620.1, AT2G22125.1, AT2G30860.1, AT2G30940.1, AT2G31570.1, AT2G33470.1, AT2G44060.1, AT2G44350.1, AT3G01390.1, AT3G04120.1, AT3G05910.1, AT3G09630.1, AT3G09820…	GO:0071944
203	⊕	GO:BP	GO:0009793	embryo development ending in seed dormancy	0.0326	1.49	414	426	16	3.86	AT1G07890.1, AT1G16460.1, AT1G32500.1, AT1G36160.1, AT1G64520.1, AT2G04842.1, AT3G11270.1, AT3G48750.1, AT3G55610.1, AT3G61140.1, AT4G01560.1, AT4G11150.1, AT4G11260.1, AT4G13940.3, AT5G07370.1, AT5G16715.1	GO:0009793
244	⊕	GO:CC	GO:0010287	plastoglobule	0.0327	1.49	62	453	5	8.06	AT1G09340.1, AT1G32220.1, AT2G35490.1, AT4G04020.1, AT4G38970.2	GO:0010287
259	⊕	GO:CC	GO:0030135	coated vesicle	0.0324	1.49	139	453	8	5.76	AT1G10290.1, AT1G10730.1, AT1G52360.1, AT1G60780.1, AT2G21390.1, AT3G11130.1, AT5G05010.1, AT5G11490.1	GO:0030135
377	⊕	GO:BP	GO:0006766	vitamin metabolic process	0.0323	1.49	112	426	7	6.25	AT1G22940.1, AT1G60550.1, AT1G74910.3, AT2G29630.1, AT2G38230.1, AT2G39770.1, AT5G28840.1	GO:0006766
91	⊕	KEGG	map00860	Porphyrin metabolism	0.0328	1.48	53	265	8	15.09	AT1G03475.1, AT1G08520.1, AT4G18480.1, AT4G27440.1, AT5G13630.1, AT5G45930.1, AT5G54190.1, AT5G64050.1	map00860
207	⊕	GO:BP	GO:0010498	proteasomal protein catabolic process	0.0338	1.47	307	426	13	4.23	AT1G08450.1, AT1G09100.1, AT1G45000.1, AT1G50670.1, AT1G51710.1, AT1G53780.1, AT1G64520.1, AT1G75950.1, AT2G20140.1, AT3G11270.1, AT3G22630.1, AT5G03340.1, AT5G23540.1	GO:0010498
596	⊕	KEGG	map00300	Lysine biosynthesis	0.0343	1.46	15	265	4	26.67	AT2G44040.1, AT4G19710.2, AT5G13280.1, AT5G14060.1	map00300
138	⊕	GO:BP	GO:0016192	vesicle-mediated transport	0.0353	1.45	532	426	19	3.57	AT1G06400.1, AT1G10290.1, AT1G10730.1, AT1G52360.1, AT1G60780.1, AT1G67930.1, AT2G17790.1, AT2G21390.1, AT2G37550.1, AT3G11130.1, AT3G43300.1, AT3G51310.1, AT4G16340.1, AT4G24550.1, AT5G05010.1, AT5G11490.1, AT5G41950.1, AT5G46630.2, AT5G54440.1	GO:0016192
116	⊕	GO:CC	GO:0005850	eukaryotic translation initiation factor 2 complex	0.0362	1.44	8	453	2	25	AT1G04170.1, AT4G18330.1	GO:0005850
578	⊕	GO:BP	GO:1902904	negative regulation of supramolecular fiber organization	0.0362	1.44	20	426	3	15	AT2G43800.1, AT3G57410.1, AT4G30160.1	GO:1902904
585	⊕	GO:BP	GO:1902903	regulation of supramolecular fiber organization	0.0365	1.44	39	426	4	10.26	AT2G43800.1, AT3G57410.1, AT4G16340.1, AT4G30160.1	GO:1902903
587	⊕	GO:BP	GO:0051494	negative regulation of cytoskeleton organization	0.0362	1.44	20	426	3	15	AT2G43800.1, AT3G57410.1, AT4G30160.1	GO:0051494
602	⊕	GO:BP	GO:0019321	pentose metabolic process	0.0362	1.44	20	426	3	15	AT2G47650.2, AT3G10740.1, AT4G16130.1	GO:0019321
504	⊕	GO:BP	GO:0042545	cell wall modification	0.0369	1.43	145	426	8	5.52	AT1G69940.1, AT2G43050.1, AT3G59010.1, AT4G34980.1, AT5G44070.1, AT5G53370.1, AT5G61680.1, AT5G63800.1	GO:0042545
524	⊕	GO:BP	GO:0009069	serine family amino acid metabolic process	0.0369	1.43	62	426	5	8.06	AT1G72810.1, AT2G20860.1, AT3G10050.1, AT3G61440.1, AT4G19710.2	GO:0009069
4	⊕	GO:CC	GO:0030659	cytoplasmic vesicle membrane	0.0377	1.42	265	453	12	4.53	AT1G01200.1, AT1G10730.1, AT1G52360.1, AT1G60780.1, AT2G01690.1, AT2G17790.1, AT2G21390.1, AT3G11130.1, AT3G43300.1, AT3G51310.1, AT5G05010.1, AT5G11490.1	GO:0030659
71	⊕	GO:BP	GO:0006508	proteolysis	0.0384	1.42	1114	426	33	2.96	AT1G02560.1, AT1G06430.1, AT1G08450.1, AT1G09100.1, AT1G09130.1, AT1G11910.1, AT1G20200.1, AT1G23410.1, AT1G29150.1, AT1G45000.1, AT1G47250.1, AT1G49970.1, AT1G50670.1, AT1G51710.1, AT1G53780.1, AT1G64520.1, AT1G65650.1, AT1G66670.1, AT1G75950.1, AT1G75990.1, AT2G20140.1, AT2G47940.1, AT3G11270.1, AT3G18490.1, AT3G19170.1, AT3G22630.1, AT3G61140.1, AT4G11260.1, AT4G30530.1, AT4G34980.1, AT5G03340…	GO:0006508
14	⊕	GO:BP	GO:0071554	cell wall organization or biogenesis	0.0393	1.41	699	426	23	3.29	AT1G01200.1, AT1G06400.1, AT1G30230.1, AT1G69940.1, AT1G78060.1, AT2G22125.1, AT2G39770.1, AT2G43050.1, AT3G05910.1, AT3G08900.1, AT3G10740.1, AT3G29360.1, AT3G59010.1, AT4G11150.1, AT4G19410.1, AT4G24510.1, AT4G34980.1, AT5G16510.1, AT5G44070.1, AT5G53370.1, AT5G61680.1, AT5G63800.1, AT5G64570.1	GO:0071554
131	⊕	GO:BP	GO:0009414	response to water deprivation	0.0388	1.41	424	426	16	3.77	AT1G05180.1, AT1G09340.1, AT1G35720.1, AT1G52400.1, AT1G76080.1, AT1G76180.1, AT2G22125.1, AT2G44060.1, AT3G11130.1, AT3G18490.1, AT3G52150.1, AT4G23400.1, AT4G26070.1, AT5G23010.1, AT5G56030.1, AT5G67030.1	GO:0009414
140	⊕	GO:BP	GO:0016051	carbohydrate biosynthetic process	0.0388	1.41	350	426	14	4	AT1G06410.1, AT1G11720.1, AT1G30230.1, AT1G51420.1, AT1G74910.3, AT2G21170.1, AT2G22125.1, AT2G39770.1, AT2G39930.1, AT3G04120.1, AT3G54050.1, AT4G38970.2, AT5G11110.1, AT5G28840.1	GO:0016051
142	⊕	GO:BP	GO:0009312	oligosaccharide biosynthetic process	0.0388	1.41	40	426	4	10	AT1G06410.1, AT1G51420.1, AT3G54050.1, AT5G11110.1	GO:0009312
582	⊕	GO:BP	GO:0032535	regulation of cellular component size	0.0388	1.41	63	426	5	7.94	AT2G43800.1, AT3G57410.1, AT4G16340.1, AT4G30160.1, AT4G33650.1	GO:0032535
584	⊕	GO:BP	GO:0090066	regulation of anatomical structure size	0.0388	1.41	63	426	5	7.94	AT2G43800.1, AT3G57410.1, AT4G16340.1, AT4G30160.1, AT4G33650.1	GO:0090066
613	⊕	GO:BP	GO:0009112	nucleobase metabolic process	0.0388	1.41	40	426	4	10	AT3G09820.1, AT3G17810.1, AT3G53900.1, AT4G12440.1	GO:0009112
276	⊕	GO:BP	GO:2000896	amylopectin metabolic process	0.0402	1.4	7	426	2	28.57	AT1G11720.1, AT2G39930.1	GO:2000896
278	⊕	GO:BP	GO:0010021	amylopectin biosynthetic process	0.0402	1.4	7	426	2	28.57	AT1G11720.1, AT2G39930.1	GO:0010021
353	⊕	GO:MF	GO:0016832	aldehyde-lyase activity	0.0397	1.4	23	441	3	13.04	AT1G18270.1, AT1G72970.1, AT4G38970.2	GO:0016832
375	⊕	GO:BP	GO:0042357	thiamine diphosphate metabolic process	0.0402	1.4	7	426	2	28.57	AT1G22940.1, AT2G29630.1	GO:0042357
382	⊕	GO:BP	GO:0009229	thiamine diphosphate biosynthetic process	0.0402	1.4	7	426	2	28.57	AT1G22940.1, AT2G29630.1	GO:0009229
450	⊕	GO:MF	GO:0016880	acid-ammonia (or amide) ligase activity	0.0403	1.4	8	441	2	25	AT1G48470.1, AT3G04480.1	GO:0016880
474	⊕	GO:BP	GO:0009147	pyrimidine nucleoside triphosphate metabolic process	0.0401	1.4	21	426	3	14.29	AT1G55810.1, AT4G26510.1, AT5G40870.1	GO:0009147
506	⊕	GO:MF	GO:0045330	aspartyl esterase activity	0.0396	1.4	67	441	5	7.46	AT1G69940.1, AT2G43050.1, AT3G59010.1, AT5G53370.1, AT5G61680.1	GO:0045330
521	⊕	GO:MF	GO:0008186	ATP-dependent activity, acting on RNA	0.0397	1.4	94	441	6	6.38	AT1G72730.1, AT2G42520.1, AT2G45810.1, AT3G53110.1, AT3G61240.1, AT5G11170.1	GO:0008186
522	⊕	GO:MF	GO:0003724	RNA helicase activity	0.0397	1.4	94	441	6	6.38	AT1G72730.1, AT2G42520.1, AT2G45810.1, AT3G53110.1, AT3G61240.1, AT5G11170.1	GO:0003724
611	⊕	GO:MF	GO:0004448	isocitrate dehydrogenase [NAD(P)+] activity	0.0403	1.4	8	441	2	25	AT3G09810.1, AT5G03290.1	GO:0004448
615	⊕	GO:BP	GO:0044209	AMP salvage	0.0402	1.4	7	426	2	28.57	AT3G09820.1, AT4G12440.1	GO:0044209
617	⊕	GO:BP	GO:0019566	arabinose metabolic process	0.0402	1.4	7	426	2	28.57	AT3G10740.1, AT4G16130.1	GO:0019566
639	⊕	GO:BP	GO:0019627	urea metabolic process	0.0402	1.4	7	426	2	28.57	AT4G08870.1, AT4G08900.1	GO:0019627
169	⊕	GO:BP	GO:0019684	photosynthesis, light reaction	0.041	1.39	149	426	8	5.37	AT1G06680.1, AT1G16720.1, AT1G55480.1, AT2G46820.1, AT2G47940.1, AT3G54050.1, AT4G04020.1, AT4G21280.1	GO:0019684
227	⊕	GO:BP	GO:0009555	pollen development	0.0412	1.39	354	426	14	3.95	AT1G09100.1, AT1G18450.1, AT1G62940.1, AT1G74260.1, AT2G01690.1, AT2G22125.1, AT3G09880.1, AT3G48750.1, AT3G55610.1, AT4G24510.1, AT4G35420.1, AT5G07370.1, AT5G11110.1, AT5G58270.1	GO:0009555
8	⊕	GO:CC	GO:0012506	vesicle membrane	0.0417	1.38	269	453	12	4.46	AT1G01200.1, AT1G10730.1, AT1G52360.1, AT1G60780.1, AT2G01690.1, AT2G17790.1, AT2G21390.1, AT3G11130.1, AT3G43300.1, AT3G51310.1, AT5G05010.1, AT5G11490.1	GO:0012506
121	⊕	GO:CC	GO:0022625	cytosolic large ribosomal subunit	0.0421	1.38	147	453	8	5.44	AT1G04480.1, AT1G26910.2, AT1G27400.1, AT3G09630.1, AT3G24830.1, AT3G25920.1, AT3G49910.1, AT4G01310.1	GO:0022625
183	⊕	GO:BP	GO:1901615	organic hydroxy compound metabolic process	0.0419	1.38	392	426	15	3.83	AT1G07250.1, AT1G11840.1, AT1G22940.1, AT1G52400.1, AT2G21170.1, AT2G29630.1, AT2G38230.1, AT3G09810.1, AT3G14790.1, AT4G11820.1, AT4G33070.1, AT5G03290.1, AT5G07370.1, AT5G51970.1, AT5G67030.1	GO:1901615
213	⊕	GO:CC	GO:0005856	cytoskeleton	0.0417	1.38	472	453	18	3.81	AT1G08730.1, AT1G10200.1, AT1G10290.1, AT1G75780.1, AT1G75950.1, AT2G22125.1, AT3G18780.1, AT3G48750.1, AT3G57410.1, AT4G14960.1, AT4G19410.1, AT4G20890.1, AT4G30160.1, AT4G33650.1, AT5G03340.1, AT5G10470.1, AT5G44340.1, AT5G62690.1	GO:0005856
374	⊕	GO:BP	GO:0006767	water-soluble vitamin metabolic process	0.0417	1.38	91	426	6	6.59	AT1G22940.1, AT1G74910.3, AT2G29630.1, AT2G38230.1, AT2G39770.1, AT5G28840.1	GO:0006767
261	⊕	GO:CC	GO:0030136	clathrin-coated vesicle	0.0425	1.37	67	453	5	7.46	AT1G10290.1, AT1G10730.1, AT1G60780.1, AT3G11130.1, AT5G11490.1	GO:0030136
264	⊕	GO:CC	GO:0099513	polymeric cytoskeletal fiber	0.0425	1.37	271	453	12	4.43	AT1G10290.1, AT1G75780.1, AT2G22125.1, AT3G48750.1, AT3G57410.1, AT4G14960.1, AT4G20890.1, AT4G30160.1, AT4G33650.1, AT5G10470.1, AT5G44340.1, AT5G62690.1	GO:0099513
242	⊕	GO:BP	GO:0006364	rRNA processing	0.044	1.36	285	426	12	4.21	AT1G09340.1, AT1G48830.1, AT1G49970.1, AT2G36160.1, AT3G11270.1, AT3G51800.1, AT3G52150.1, AT4G01560.1, AT4G14510.1, AT4G25630.1, AT5G13650.1, AT5G16130.1	GO:0006364
498	⊕	GO:BP	GO:0009313	oligosaccharide catabolic process	0.044	1.36	22	426	3	13.64	AT1G64190.1, AT2G40840.1, AT5G41670.1	GO:0009313
542	⊕	GO:MF	GO:0097599	xylanase activity	0.0439	1.36	24	441	3	12.5	AT1G78060.1, AT3G10740.1, AT5G64570.1	GO:0097599
649	⊕	GO:CC	GO:0016281	eukaryotic translation initiation factor 4F complex	0.0433	1.36	9	453	2	22.22	AT4G18040.1, AT5G57870.1	GO:0016281
58	⊕	GO:MF	GO:0004252	serine-type endopeptidase activity	0.0443	1.35	126	441	7	5.56	AT1G02560.1, AT1G09130.1, AT1G49970.1, AT1G66670.1, AT2G47940.1, AT4G34980.1, AT5G45390.1	GO:0004252
130	⊕	GO:BP	GO:0010033	response to organic substance	0.0449	1.35	2352	426	60	2.55	AT1G05180.1, AT1G06400.1, AT1G08450.1, AT1G09100.1, AT1G09310.1, AT1G09340.1, AT1G20630.1, AT1G22530.1, AT1G25490.1, AT1G35720.1, AT1G36160.1, AT1G45000.1, AT1G48410.1, AT1G48630.1, AT1G50670.1, AT1G52400.1, AT1G64520.1, AT1G75950.1, AT1G76080.1, AT1G76180.1, AT1G76550.1, AT2G22125.1, AT2G29630.1, AT2G33150.1, AT2G36250.1, AT2G39770.1, AT2G41530.1, AT2G44060.1, AT3G04120.1, AT3G09820.1, AT3G09880…	GO:0010033
260	⊕	GO:CC	GO:0099081	supramolecular polymer	0.0448	1.35	274	453	12	4.38	AT1G10290.1, AT1G75780.1, AT2G22125.1, AT3G48750.1, AT3G57410.1, AT4G14960.1, AT4G20890.1, AT4G30160.1, AT4G33650.1, AT5G10470.1, AT5G44340.1, AT5G62690.1	GO:0099081
262	⊕	GO:CC	GO:0099512	supramolecular fiber	0.0448	1.35	274	453	12	4.38	AT1G10290.1, AT1G75780.1, AT2G22125.1, AT3G48750.1, AT3G57410.1, AT4G14960.1, AT4G20890.1, AT4G30160.1, AT4G33650.1, AT5G10470.1, AT5G44340.1, AT5G62690.1	GO:0099512
470	⊕	GO:BP	GO:0009642	response to light intensity	0.045	1.35	152	426	8	5.26	AT1G55480.1, AT1G64520.1, AT2G27820.1, AT3G18780.1, AT3G61140.1, AT4G04020.1, AT4G24800.1, AT5G54190.1	GO:0009642
609	⊕	GO:CC	GO:0033178	proton-transporting two-sector ATPase complex, catalytic domain	0.0449	1.35	25	453	3	12	AT3G08560.1, AT3G42050.1, AT4G11150.1	GO:0033178
196	⊕	GO:BP	GO:0010154	fruit development	0.0458	1.34	671	426	22	3.28	AT1G07890.1, AT1G16460.1, AT1G32440.1, AT1G32500.1, AT1G36160.1, AT1G64520.1, AT2G04842.1, AT3G04120.1, AT3G11270.1, AT3G48750.1, AT3G55610.1, AT3G61140.1, AT4G01560.1, AT4G11150.1, AT4G11260.1, AT4G13940.3, AT4G14510.1, AT4G35420.1, AT5G07370.1, AT5G16715.1, AT5G52920.1, AT5G63800.1	GO:0010154
136	⊕	GO:BP	GO:0009415	response to water	0.0471	1.33	436	426	16	3.67	AT1G05180.1, AT1G09340.1, AT1G35720.1, AT1G52400.1, AT1G76080.1, AT1G76180.1, AT2G22125.1, AT2G44060.1, AT3G11130.1, AT3G18490.1, AT3G52150.1, AT4G23400.1, AT4G26070.1, AT5G23010.1, AT5G56030.1, AT5G67030.1	GO:0009415
468	⊕	GO:CC	GO:0098552	side of membrane	0.047	1.33	46	453	4	8.7	AT1G55480.1, AT2G22125.1, AT3G46780.1, AT5G24020.1	GO:0098552
206	⊕	GO:BP	GO:0019941	modification-dependent protein catabolic process	0.0475	1.32	514	426	18	3.5	AT1G08450.1, AT1G09100.1, AT1G20200.1, AT1G23410.1, AT1G29150.1, AT1G45000.1, AT1G47250.1, AT1G50670.1, AT1G51710.1, AT1G64520.1, AT1G65650.1, AT1G75950.1, AT1G75990.1, AT2G20140.1, AT3G11270.1, AT4G11260.1, AT5G03340.1, AT5G23540.1	GO:0019941
214	⊕	GO:BP	GO:0030029	actin filament-based process	0.0475	1.32	123	426	7	5.69	AT1G08730.1, AT1G10200.1, AT2G43800.1, AT3G57410.1, AT4G16340.1, AT4G30160.1, AT5G10470.1	GO:0030029
507	⊕	GO:MF	GO:0030599	pectinesterase activity	0.0478	1.32	71	441	5	7.04	AT1G69940.1, AT2G43050.1, AT3G59010.1, AT5G53370.1, AT5G61680.1	GO:0030599
208	⊕	KEGG	map04145	Phagosome	0.0494	1.31	83	265	10	12.05	AT1G08450.1, AT1G75780.1, AT3G01390.1, AT3G08560.1, AT3G42050.1, AT4G11150.1, AT4G14960.1, AT4G20890.1, AT5G44340.1, AT5G62690.1	map04145
323	⊕	GO:BP	GO:0006183	GTP biosynthetic process	0.0495	1.31	8	426	2	25	AT1G16350.1, AT1G79470.1	GO:0006183
337	⊕	GO:BP	GO:0046039	GTP metabolic process	0.0495	1.31	8	426	2	25	AT1G16350.1, AT1G79470.1	GO:0046039
448	⊕	GO:BP	GO:0043254	regulation of protein-containing complex assembly	0.0495	1.31	44	426	4	9.09	AT1G45000.1, AT2G43800.1, AT3G57410.1, AT4G30160.1	GO:0043254
449	⊕	GO:MF	GO:0035197	siRNA binding	0.0484	1.31	9	441	2	22.22	AT1G48410.1, AT2G27040.1	GO:0035197
451	⊕	KEGG	map00220	Arginine biosynthesis	0.0488	1.31	36	265	6	16.67	AT1G48470.1, AT1G70580.1, AT1G72330.1, AT3G57560.1, AT4G08870.1, AT4G08900.1	map00220
494	⊕	GO:BP	GO:0080110	sporopollenin biosynthetic process	0.0495	1.31	8	426	2	25	AT1G62940.1, AT4G35420.1	GO:0080110
510	⊕	KEGG	map00260	Glycine, serine and threonine metabolism	0.0488	1.31	70	265	9	12.86	AT1G70580.1, AT1G72810.1, AT1G80380.1, AT3G10050.1, AT3G16950.1, AT4G16155.1, AT4G19710.2, AT5G13280.1, AT5G14060.1	map00260
540	⊕	GO:BP	GO:0031222	arabinan catabolic process	0.0495	1.31	8	426	2	25	AT1G78060.1, AT5G64570.1	GO:0031222
557	⊕	GO:MF	GO:0000104	succinate dehydrogenase activity	0.0484	1.31	9	441	2	22.22	AT2G18450.1, AT5G66760.1	GO:0000104
559	⊕	GO:MF	GO:0016635	oxidoreductase activity, acting on the CH-CH group of donors, quinone or related compound as acceptor	0.0484	1.31	9	441	2	22.22	AT2G18450.1, AT5G66760.1	GO:0016635
574	⊕	GO:BP	GO:0008154	actin polymerization or depolymerization	0.0495	1.31	44	426	4	9.09	AT2G43800.1, AT3G57410.1, AT4G16340.1, AT4G30160.1	GO:0008154
576	⊕	GO:BP	GO:0030833	regulation of actin filament polymerization	0.0489	1.31	23	426	3	13.04	AT2G43800.1, AT3G57410.1, AT4G30160.1	GO:0030833
588	⊕	GO:BP	GO:0032956	regulation of actin cytoskeleton organization	0.0495	1.31	44	426	4	9.09	AT2G43800.1, AT3G57410.1, AT4G16340.1, AT4G30160.1	GO:0032956
612	⊕	GO:BP	GO:0006166	purine ribonucleoside salvage	0.0495	1.31	8	426	2	25	AT3G09820.1, AT4G12440.1	GO:0006166
614	⊕	GO:BP	GO:0043174	nucleoside salvage	0.0495	1.31	8	426	2	25	AT3G09820.1, AT4G12440.1	GO:0043174
632	⊕	GO:MF	GO:0030976	thiamine pyrophosphate binding	0.0484	1.31	9	441	2	22.22	AT3G55410.1, AT4G33070.1	GO:0030976
635	⊕	GO:BP	GO:0006561	proline biosynthetic process	0.0495	1.31	8	426	2	25	AT3G55610.1, AT5G46180.1	GO:0006561
644	⊕	GO:MF	GO:0016813	hydrolase activity, acting on carbon-nitrogen (but not peptide) bonds, in linear amidines	0.0484	1.31	9	441	2	22.22	AT4G08870.1, AT4G08900.1	GO:0016813
667	⊕	GO:MF	GO:0030060	L-malate dehydrogenase activity	0.0484	1.31	9	441	2	22.22	AT5G09660.3, AT5G58330.1	GO:0030060
